# Supplementary material
Source: publisher figshare collection journal article supplement (https://springernature.figshare.com/ndownloader/files/13158620)
Supplement: Supplementary file 1 [file 13158620]

id	X	Y	Day	String	Pot	Sex	Carapace_length_[mm]	Notching_performed	Notch_present	Berried	Recently_moulted	Date_captured	Tagged_recapture	Days_at_liberty	Starting_Carapace_length_[mm]	Growth_[mm]	Distance_from_release_point_[m]
1.1.1	650372	656228	1	1	1	F	33.8	N	N	N	N	02/04/2014	Y	U	33.4	0.4	131
1.1.1	650372	656228	1	1	1	M	43.5	Y	N	N	N	02/04/2014	N	NA	NA	NA	NA
1.1.10	650462	656193	1	1	10	M	42	Y	N	N	N	02/04/2014	N	NA	NA	NA	NA
1.1.10	650462	656193	1	1	10	M	44	Y	N	N	N	02/04/2014	N	NA	NA	NA	NA
1.1.11	650472	656190	1	1	11	F	38.3	Y	N	N	N	02/04/2014	N	NA	NA	NA	NA
1.1.11	650472	656190	1	1	11	M	48.9	Y	N	N	N	02/04/2014	N	NA	NA	NA	NA
1.1.11	650472	656190	1	1	11	M	53.5	Y	N	N	N	02/04/2014	N	NA	NA	NA	NA
1.1.12	650482	656186	1	1	12	M	34.3	Y	N	N	N	02/04/2014	N	NA	NA	NA	NA
1.1.13	650492	656182	1	1	13	M	40.4	Y	N	N	N	02/04/2014	N	NA	NA	NA	NA
1.1.13	650492	656182	1	1	13	M	50.7	Y	N	N	N	02/04/2014	N	NA	NA	NA	NA
1.1.14	650502	656178	1	1	14	M	41.4	Y	N	N	N	02/04/2014	N	NA	NA	NA	NA
1.1.15	650512	656174	1	1	15	M	41	Y	N	N	N	02/04/2014	N	NA	NA	NA	NA
1.1.16	650522	656171	1	1	16	F	45.5	Y	N	Y	N	02/04/2014	N	NA	NA	NA	NA
1.1.16	650522	656171	1	1	16	F	45.5	Y	N	N	N	02/04/2014	N	NA	NA	NA	NA
1.1.17	650532	656167	1	1	17	M	41.4	N	N	N	N	02/04/2014	N	NA	NA	NA	NA
1.1.18	650542	656163	1	1	18	F	30.3	Y	N	N	N	02/04/2014	N	NA	NA	NA	NA
1.1.18	650542	656163	1	1	18	M	39	Y	N	N	N	02/04/2014	N	NA	NA	NA	NA
1.1.18	650542	656163	1	1	18	M	50.9	N	N	N	N	02/04/2014	N	NA	NA	NA	NA
1.1.19	650552	656159	1	1	19	M	50.1	Y	N	N	N	02/04/2014	N	NA	NA	NA	NA
1.1.19	650552	656159	1	1	19	M	54	Y	N	N	N	02/04/2014	N	NA	NA	NA	NA
1.1.2	650382	656224	1	1	2	9999	NA	N	N	N	N	02/04/2014	N	NA	NA	NA	NA
1.1.20	650562	656155	1	1	20	M	47.7	Y	N	N	N	02/04/2014	N	NA	NA	NA	NA
1.1.21	650570	656149	1	1	21	F	40.1	Y	N	N	N	02/04/2014	N	NA	NA	NA	NA
1.1.21	650570	656149	1	1	21	M	40.3	Y	N	N	N	02/04/2014	N	NA	NA	NA	NA
1.1.22	650573	656132	1	1	22	9999	NA	N	N	N	N	02/04/2014	N	NA	NA	NA	NA
1.1.23	650576	656116	1	1	23	F	43	Y	N	N	N	02/04/2014	N	NA	NA	NA	NA
1.1.23	650576	656116	1	1	23	M	42.6	Y	N	N	N	02/04/2014	N	NA	NA	NA	NA
1.1.24	650579	656099	1	1	24	M	56	N	N	N	N	02/04/2014	N	NA	NA	NA	NA
1.1.25	650576	656091	1	1	25	M	49	Y	N	N	N	02/04/2014	N	NA	NA	NA	NA
1.1.26	650565	656091	1	1	26	M	55.6	Y	N	N	N	02/04/2014	N	NA	NA	NA	NA
1.1.27	650555	656091	1	1	27	M	44.7	Y	N	N	N	02/04/2014	N	NA	NA	NA	NA
1.1.27	650555	656091	1	1	27	M	49.2	Y	N	N	N	02/04/2014	N	NA	NA	NA	NA
1.1.28	650545	656091	1	1	28	9999	NA	N	N	N	N	02/04/2014	N	NA	NA	NA	NA
1.1.29	650535	656092	1	1	29	F	38.7	Y	N	N	N	02/04/2014	N	NA	NA	NA	NA
1.1.29	650535	656092	1	1	29	M	39.7	Y	N	N	N	02/04/2014	N	NA	NA	NA	NA
1.1.29	650535	656092	1	1	29	M	46.5	Y	N	N	N	02/04/2014	N	NA	NA	NA	NA
1.1.29	650535	656092	1	1	29	M	53.2	Y	N	N	N	02/04/2014	N	NA	NA	NA	NA
1.1.29	650535	656092	1	1	29	M	56.5	N	N	N	N	02/04/2014	N	NA	NA	NA	NA
1.1.3	650392	656220	1	1	3	M	30.8	Y	N	N	N	02/04/2014	N	NA	NA	NA	NA
1.1.30	650525	656095	1	1	30	M	41.6	Y	N	N	N	02/04/2014	N	NA	NA	NA	NA
1.1.31	650515	656099	1	1	31	F	36.6	Y	N	N	Y	02/04/2014	N	NA	NA	NA	NA
1.1.31	650515	656099	1	1	31	F	41.9	Y	N	N	N	02/04/2014	N	NA	NA	NA	NA
1.1.31	650515	656099	1	1	31	M	46.5	Y	N	N	N	02/04/2014	N	NA	NA	NA	NA
1.1.31	650515	656099	1	1	31	M	47.4	Y	N	N	N	02/04/2014	N	NA	NA	NA	NA
1.1.31	650515	656099	1	1	31	M	47.6	Y	N	N	N	02/04/2014	N	NA	NA	NA	NA
1.1.31	650515	656099	1	1	31	M	51	N	N	N	N	02/04/2014	N	NA	NA	NA	NA
1.1.32	650505	656104	1	1	32	M	46.5	Y	N	N	N	02/04/2014	N	NA	NA	NA	NA
1.1.32	650505	656104	1	1	32	M	47.9	Y	N	N	N	02/04/2014	N	NA	NA	NA	NA
1.1.33	650495	656108	1	1	33	F	40.4	Y	N	N	N	02/04/2014	N	NA	NA	NA	NA
1.1.33	650495	656108	1	1	33	M	43.9	Y	N	N	N	02/04/2014	N	NA	NA	NA	NA
1.1.33	650495	656108	1	1	33	M	58.3	Y	N	N	N	02/04/2014	N	NA	NA	NA	NA
1.1.34	650485	656112	1	1	34	F	34.9	Y	N	N	N	02/04/2014	N	NA	NA	NA	NA
1.1.34	650485	656112	1	1	34	F	36.5	N	N	N	N	02/04/2014	Y	287	34.7	1.8	269
1.1.34	650485	656112	1	1	34	M	42.8	Y	N	N	N	02/04/2014	N	NA	NA	NA	NA
1.1.34	650485	656112	1	1	34	M	52.5	Y	N	N	N	02/04/2014	N	NA	NA	NA	NA
1.1.35	650475	656117	1	1	35	M	30.3	Y	N	N	N	02/04/2014	N	NA	NA	NA	NA
1.1.35	650475	656117	1	1	35	M	34.3	Y	N	N	N	02/04/2014	N	NA	NA	NA	NA
1.1.35	650475	656117	1	1	35	M	39.8	Y	N	N	N	02/04/2014	N	NA	NA	NA	NA
1.1.35	650475	656117	1	1	35	M	49.2	N	N	N	N	02/04/2014	N	NA	NA	NA	NA
1.1.36	650465	656121	1	1	36	F	33.3	Y	N	N	N	02/04/2014	N	NA	NA	NA	NA
1.1.36	650465	656121	1	1	36	F	41.5	Y	N	N	N	02/04/2014	N	NA	NA	NA	NA
1.1.36	650465	656121	1	1	36	F	44.6	Y	N	N	N	02/04/2014	N	NA	NA	NA	NA
1.1.36	650465	656121	1	1	36	M	44.7	Y	N	N	N	02/04/2014	N	NA	NA	NA	NA
1.1.37	650455	656125	1	1	37	F	41	Y	N	N	N	02/04/2014	N	NA	NA	NA	NA
1.1.37	650455	656125	1	1	37	M	36.8	Y	N	N	N	02/04/2014	N	NA	NA	NA	NA
1.1.37	650455	656125	1	1	37	M	46.8	Y	N	N	N	02/04/2014	N	NA	NA	NA	NA
1.1.37	650455	656125	1	1	37	M	51.4	N	N	N	N	02/04/2014	N	NA	NA	NA	NA
1.1.38	650445	656130	1	1	38	F	37.2	Y	N	N	N	02/04/2014	N	NA	NA	NA	NA
1.1.38	650445	656130	1	1	38	M	39.3	Y	N	N	N	02/04/2014	N	NA	NA	NA	NA
1.1.38	650445	656130	1	1	38	M	39.3	Y	N	N	N	02/04/2014	N	NA	NA	NA	NA
1.1.39	650435	656134	1	1	39	F	33.3	Y	N	N	N	02/04/2014	N	NA	NA	NA	NA
1.1.39	650435	656134	1	1	39	F	36.4	Y	N	N	N	02/04/2014	N	NA	NA	NA	NA
1.1.39	650435	656134	1	1	39	F	36.8	Y	N	N	N	02/04/2014	N	NA	NA	NA	NA
1.1.39	650435	656134	1	1	39	F	41.5	Y	N	N	N	02/04/2014	N	NA	NA	NA	NA
1.1.39	650435	656134	1	1	39	F	49.7	Y	N	N	N	02/04/2014	N	NA	NA	NA	NA
1.1.4	650402	656216	1	1	4	M	37.4	Y	N	N	N	02/04/2014	N	NA	NA	NA	NA
1.1.40	650426	656138	1	1	40	F	34.9	Y	N	N	N	02/04/2014	N	NA	NA	NA	NA
1.1.40	650426	656138	1	1	40	F	37.5	Y	N	N	N	02/04/2014	N	NA	NA	NA	NA
1.1.40	650426	656138	1	1	40	M	44.5	Y	N	N	N	02/04/2014	N	NA	NA	NA	NA
1.1.40	650426	656138	1	1	40	M	54.5	N	N	N	N	02/04/2014	N	NA	NA	NA	NA
1.1.41	650416	656143	1	1	41	M	37	Y	N	N	N	02/04/2014	N	NA	NA	NA	NA
1.1.41	650416	656143	1	1	41	M	38	N	N	N	N	02/04/2014	Y	258	35.3	2.7	193
1.1.41	650416	656143	1	1	41	M	40	N	N	N	N	02/04/2014	Y	301	34.1	5.9	193
1.1.41	650416	656143	1	1	41	M	42.6	Y	N	N	N	02/04/2014	N	NA	NA	NA	NA
1.1.41	650416	656143	1	1	41	M	47.1	Y	N	N	N	02/04/2014	N	NA	NA	NA	NA
1.1.42	650406	656147	1	1	42	M	43.3	Y	N	N	N	02/04/2014	N	NA	NA	NA	NA
1.1.43	650396	656151	1	1	43	F	39.1	Y	N	Y	N	02/04/2014	N	NA	NA	NA	NA
1.1.43	650396	656151	1	1	43	M	44.4	Y	N	N	N	02/04/2014	N	NA	NA	NA	NA
1.1.44	650386	656156	1	1	44	M	40.2	Y	N	N	N	02/04/2014	N	NA	NA	NA	NA
1.1.44	650386	656156	1	1	44	M	U	Y	N	N	N	02/04/2014	N	NA	NA	NA	NA
1.1.45	650376	656160	1	1	45	F	41	Y	N	N	N	02/04/2014	N	NA	NA	NA	NA
1.1.45	650376	656160	1	1	45	M	34.6	Y	N	N	N	02/04/2014	N	NA	NA	NA	NA
1.1.45	650376	656160	1	1	45	M	53.1	N	N	N	N	02/04/2014	N	NA	NA	NA	NA
1.1.46	650366	656164	1	1	46	M	46.6	Y	N	N	N	02/04/2014	N	NA	NA	NA	NA
1.1.47	650356	656169	1	1	47	F	35	Y	N	N	N	02/04/2014	N	NA	NA	NA	NA
1.1.47	650356	656169	1	1	47	M	37.7	N	N	N	N	02/04/2014	Y	301	34	3.7	129
1.1.47	650356	656169	1	1	47	M	47.8	Y	N	N	N	02/04/2014	N	NA	NA	NA	NA
1.1.48	650346	656173	1	1	48	F	36.7	Y	N	N	N	02/04/2014	N	NA	NA	NA	NA
1.1.48	650346	656173	1	1	48	M	47.8	Y	N	N	N	02/04/2014	N	NA	NA	NA	NA
1.1.5	650412	656213	1	1	5	U	37.4	Y	N	N	N	02/04/2014	N	NA	NA	NA	NA
1.1.5	650412	656213	1	1	5	M	34.9	Y	N	N	N	02/04/2014	N	NA	NA	NA	NA
1.1.5	650412	656213	1	1	5	M	41.8	Y	N	N	N	02/04/2014	N	NA	NA	NA	NA
1.1.5	650412	656213	1	1	5	M	49.3	Y	N	N	N	02/04/2014	N	NA	NA	NA	NA
1.1.5	650412	656213	1	1	5	M	54.6	Y	N	N	N	02/04/2014	N	NA	NA	NA	NA
1.1.6	650422	656209	1	1	6	9999	NA	N	N	N	N	02/04/2014	N	NA	NA	NA	NA
1.1.7	650432	656205	1	1	7	M	33.9	Y	N	N	N	02/04/2014	N	NA	NA	NA	NA
1.1.7	650432	656205	1	1	7	M	48.7	Y	N	N	N	02/04/2014	N	NA	NA	NA	NA
1.1.7	650432	656205	1	1	7	M	52.4	Y	N	N	N	02/04/2014	N	NA	NA	NA	NA
1.1.8	650442	656201	1	1	8	M	36.4	Y	N	N	N	02/04/2014	N	NA	NA	NA	NA
1.1.8	650442	656201	1	1	8	M	40.4	Y	N	N	N	02/04/2014	N	NA	NA	NA	NA
1.1.9	650452	656197	1	1	9	F	36.8	Y	N	N	N	02/04/2014	N	NA	NA	NA	NA
1.2.1	650377	656100	1	2	1	M	51.5	N	N	N	N	02/04/2014	N	NA	NA	NA	NA
1.2.1	650377	656100	1	2	1	M	51.9	N	N	N	N	02/04/2014	N	NA	NA	NA	NA
1.2.10	650465	656066	1	2	10	F	34.5	N	N	N	N	02/04/2014	Y	258	34.5	0	275
1.2.10	650465	656066	1	2	10	F	35.3	N	N	N	N	02/04/2014	N	NA	NA	NA	NA
1.2.10	650465	656066	1	2	10	M	32.1	N	N	N	N	02/04/2014	N	NA	NA	NA	NA
1.2.10	650465	656066	1	2	10	M	39.8	N	N	N	N	02/04/2014	Y	287	36.4	3.4	275
1.2.11	650475	656062	1	2	11	F	39.9	Y	N	N	N	02/04/2014	N	NA	NA	NA	NA
1.2.12	650484	656058	1	2	12	F	40	Y	N	N	N	02/04/2014	N	NA	NA	NA	NA
1.2.12	650484	656058	1	2	12	F	45.7	Y	N	N	N	02/04/2014	N	NA	NA	NA	NA
1.2.12	650484	656058	1	2	12	M	33.8	Y	N	N	N	02/04/2014	N	NA	NA	NA	NA
1.2.12	650484	656058	1	2	12	M	49.8	Y	N	N	N	02/04/2014	N	NA	NA	NA	NA
1.2.13	650494	656054	1	2	13	F	30.8	Y	N	N	N	02/04/2014	N	NA	NA	NA	NA
1.2.13	650494	656054	1	2	13	M	38.5	N	N	N	N	02/04/2014	N	NA	NA	NA	NA
1.2.13	650494	656054	1	2	13	M	44.3	N	N	N	N	02/04/2014	Y	301	35.5	8.8	306
1.2.14	650504	656050	1	2	14	F	40.7	Y	N	N	N	02/04/2014	N	NA	NA	NA	NA
1.2.14	650504	656050	1	2	14	M	43.6	Y	N	N	N	02/04/2014	N	NA	NA	NA	NA
1.2.15	650514	656046	1	2	15	M	45.5	Y	N	N	N	02/04/2014	N	NA	NA	NA	NA
1.2.15	650514	656046	1	2	15	M	46.6	Y	N	N	N	02/04/2014	N	NA	NA	NA	NA
1.2.15	650514	656046	1	2	15	M	59.2	N	N	N	N	02/04/2014	N	NA	NA	NA	NA
1.2.16	650524	656043	1	2	16	M	49.7	N	N	N	N	02/04/2014	N	NA	NA	NA	NA
1.2.17	650533	656039	1	2	17	M	35.9	Y	N	N	N	02/04/2014	N	NA	NA	NA	NA
1.2.17	650533	656039	1	2	17	M	54.8	N	N	N	N	02/04/2014	N	NA	NA	NA	NA
1.2.17	650533	656039	1	2	17	M	54.8	N	N	N	N	02/04/2014	N	NA	NA	NA	NA
1.2.18	650543	656035	1	2	18	M	43.2	Y	N	N	N	02/04/2014	N	NA	NA	NA	NA
1.2.19	650553	656031	1	2	19	F	42	Y	N	N	N	02/04/2014	N	NA	NA	NA	NA
1.2.19	650553	656031	1	2	19	F	42.9	Y	N	N	N	02/04/2014	N	NA	NA	NA	NA
1.2.2	650387	656096	1	2	2	9999	NA	N	N	N	N	02/04/2014	N	NA	NA	NA	NA
1.2.20	650561	656023	1	2	20	F	43.5	Y	N	N	N	02/04/2014	N	NA	NA	NA	NA
1.2.20	650561	656023	1	2	20	M	50.7	Y	N	N	N	02/04/2014	N	NA	NA	NA	NA
1.2.20	650561	656023	1	2	20	M	52.3	Y	N	N	N	02/04/2014	N	NA	NA	NA	NA
1.2.21	650569	656012	1	2	21	F	31.9	Y	N	N	N	02/04/2014	N	NA	NA	NA	NA
1.2.21	650569	656012	1	2	21	F	32.7	Y	N	Y	N	02/04/2014	N	NA	NA	NA	NA
1.2.21	650569	656012	1	2	21	F	41.9	Y	N	Y	N	02/04/2014	N	NA	NA	NA	NA
1.2.21	650569	656012	1	2	21	F	50.5	Y	N	Y	N	02/04/2014	N	NA	NA	NA	NA
1.2.21	650569	656012	1	2	21	M	50	N	N	N	N	02/04/2014	N	NA	NA	NA	NA
1.2.21	650569	656012	1	2	21	M	55.9	N	N	N	N	02/04/2014	N	NA	NA	NA	NA
1.2.22	650577	656001	1	2	22	F	39.9	Y	N	N	N	02/04/2014	N	NA	NA	NA	NA
1.2.23	650584	655991	1	2	23	9999	NA	N	N	N	N	02/04/2014	N	NA	NA	NA	NA
1.2.24	650577	655989	1	2	24	9999	NA	N	N	N	N	02/04/2014	N	NA	NA	NA	NA
1.2.25	650567	655990	1	2	25	9999	NA	N	N	N	N	02/04/2014	N	NA	NA	NA	NA
1.2.26	650557	655990	1	2	26	9999	NA	N	N	N	N	02/04/2014	N	NA	NA	NA	NA
1.2.27	650547	655990	1	2	27	9999	NA	N	N	N	N	02/04/2014	N	NA	NA	NA	NA
1.2.28	650537	655990	1	2	28	9999	NA	N	N	N	N	02/04/2014	N	NA	NA	NA	NA
1.2.29	650527	655991	1	2	29	9999	NA	N	N	N	N	02/04/2014	N	NA	NA	NA	NA
1.2.3	650396	656092	1	2	3	F	34.5	Y	N	N	N	02/04/2014	N	NA	NA	NA	NA
1.2.3	650396	656092	1	2	3	M	55.1	Y	N	N	N	02/04/2014	N	NA	NA	NA	NA
1.2.30	650517	655993	1	2	30	9999	NA	N	N	N	N	02/04/2014	N	NA	NA	NA	NA
1.2.31	650507	655996	1	2	31	M	53.6	N	N	N	N	02/04/2014	N	NA	NA	NA	NA
1.2.32	650497	655999	1	2	32	F	47.6	Y	N	N	N	02/04/2014	N	NA	NA	NA	NA
1.2.32	650497	655999	1	2	32	M	52.3	N	N	N	N	02/04/2014	N	NA	NA	NA	NA
1.2.33	650487	656001	1	2	33	M	50.8	N	N	N	N	02/04/2014	N	NA	NA	NA	NA
1.2.34	650477	656004	1	2	34	9999	NA	N	N	N	N	02/04/2014	N	NA	NA	NA	NA
1.2.35	650467	656007	1	2	35	9999	NA	N	N	N	N	02/04/2014	N	NA	NA	NA	NA
1.2.36	650457	656010	1	2	36	M	51.1	N	N	N	N	02/04/2014	N	NA	NA	NA	NA
1.2.37	650447	656012	1	2	37	M	45.5	N	N	N	N	02/04/2014	N	NA	NA	NA	NA
1.2.38	650437	656015	1	2	38	M	54.5	N	N	N	N	02/04/2014	N	NA	NA	NA	NA
1.2.39	650427	656018	1	2	39	F	41.3	Y	N	N	N	02/04/2014	N	NA	NA	NA	NA
1.2.4	650406	656088	1	2	4	M	42.4	N	N	N	N	02/04/2014	N	NA	NA	NA	NA
1.2.4	650406	656088	1	2	4	M	42.8	N	N	N	N	02/04/2014	Y	301	38.4	4.4	215
1.2.4	650406	656088	1	2	4	M	50	Y	N	N	N	02/04/2014	N	NA	NA	NA	NA
1.2.40	650417	656021	1	2	40	M	41.5	Y	N	N	N	02/04/2014	N	NA	NA	NA	NA
1.2.41	650407	656024	1	2	41	9999	NA	N	N	N	N	02/04/2014	N	NA	NA	NA	NA
1.2.42	650398	656026	1	2	42	M	48	N	N	N	N	02/04/2014	N	NA	NA	NA	NA
1.2.43	650388	656029	1	2	43	9999	NA	N	N	N	N	02/04/2014	N	NA	NA	NA	NA
1.2.44	650378	656032	1	2	44	9999	NA	N	N	N	N	02/04/2014	N	NA	NA	NA	NA
1.2.45	650368	656035	1	2	45	F	40.5	Y	N	N	N	02/04/2014	N	NA	NA	NA	NA
1.2.46	650358	656037	1	2	46	9999	NA	N	N	N	N	02/04/2014	N	NA	NA	NA	NA
1.2.47	650348	656040	1	2	47	9999	NA	N	N	N	N	02/04/2014	N	NA	NA	NA	NA
1.2.48	650338	656043	1	2	48	9999	NA	N	N	N	N	02/04/2014	N	NA	NA	NA	NA
1.2.5	650416	656085	1	2	5	M	45	Y	N	N	N	02/04/2014	N	NA	NA	NA	NA
1.2.5	650416	656085	1	2	5	M	55.4	Y	N	N	N	02/04/2014	N	NA	NA	NA	NA
1.2.6	650426	656081	1	2	6	9999	NA	N	N	N	N	02/04/2014	N	NA	NA	NA	NA
1.2.7	650436	656077	1	2	7	M	38.9	Y	N	N	N	02/04/2014	N	NA	NA	NA	NA
1.2.7	650436	656077	1	2	7	M	42.9	Y	N	N	N	02/04/2014	N	NA	NA	NA	NA
1.2.8	650445	656073	1	2	8	M	42.6	Y	N	N	N	02/04/2014	N	NA	NA	NA	NA
1.2.9	650455	656069	1	2	9	F	38.5	N	N	N	N	02/04/2014	N	NA	NA	NA	NA
1.2.9	650455	656069	1	2	9	M	42	Y	N	N	N	02/04/2014	N	NA	NA	NA	NA
1.2.9	650455	656069	1	2	9	M	45	N	N	N	N	02/04/2014	Y	301	35.4	9.6	265
10.1.1	650404	656334	10	1	1	9999	NA	N	N	N	N	25/06/2014	N	NA	NA	NA	NA
10.1.10	650495	656303	10	1	10	9999	NA	N	N	N	N	25/06/2014	N	NA	NA	NA	NA
10.1.11	650505	656300	10	1	11	9999	NA	N	N	N	N	25/06/2014	N	NA	NA	NA	NA
10.1.12	650515	656296	10	1	12	9999	NA	N	N	N	N	25/06/2014	N	NA	NA	NA	NA
10.1.13	650525	656293	10	1	13	9999	NA	N	N	N	N	25/06/2014	N	NA	NA	NA	NA
10.1.14	650535	656289	10	1	14	9999	NA	N	N	N	N	25/06/2014	N	NA	NA	NA	NA
10.1.15	650545	656286	10	1	15	9999	NA	N	N	N	N	25/06/2014	N	NA	NA	NA	NA
10.1.16	650555	656283	10	1	16	9999	NA	N	N	N	N	25/06/2014	N	NA	NA	NA	NA
10.1.17	650565	656279	10	1	17	9999	NA	N	N	N	N	25/06/2014	N	NA	NA	NA	NA
10.1.18	650575	656276	10	1	18	9999	NA	N	N	N	N	25/06/2014	N	NA	NA	NA	NA
10.1.19	650586	656272	10	1	19	9999	NA	N	N	N	N	25/06/2014	N	NA	NA	NA	NA
10.1.2	650414	656331	10	1	2	9999	NA	N	N	N	N	25/06/2014	N	NA	NA	NA	NA
10.1.20	650596	656269	10	1	20	9999	NA	N	N	N	N	25/06/2014	N	NA	NA	NA	NA
10.1.21	650606	656265	10	1	21	9999	NA	N	N	N	N	25/06/2014	N	NA	NA	NA	NA
10.1.22	650616	656262	10	1	22	9999	NA	N	N	N	N	25/06/2014	N	NA	NA	NA	NA
10.1.23	650626	656257	10	1	23	9999	NA	N	N	N	N	25/06/2014	N	NA	NA	NA	NA
10.1.24	650632	656244	10	1	24	9999	NA	N	N	N	N	25/06/2014	N	NA	NA	NA	NA
10.1.25	650625	656239	10	1	25	F	37	N	N	N	N	25/06/2014	N	NA	NA	NA	NA
10.1.25	650625	656239	10	1	25	F	38.2	N	N	N	N	25/06/2014	N	NA	NA	NA	NA
10.1.25	650625	656239	10	1	25	F	40	N	N	N	N	25/06/2014	N	NA	NA	NA	NA
10.1.26	650615	656236	10	1	26	9999	NA	N	N	N	N	25/06/2014	N	NA	NA	NA	NA
10.1.27	650605	656235	10	1	27	9999	NA	N	N	N	N	25/06/2014	N	NA	NA	NA	NA
10.1.28	650595	656238	10	1	28	9999	NA	N	N	N	N	25/06/2014	N	NA	NA	NA	NA
10.1.29	650585	656242	10	1	29	9999	NA	N	N	N	N	25/06/2014	N	NA	NA	NA	NA
10.1.3	650424	656327	10	1	3	9999	NA	N	N	N	N	25/06/2014	N	NA	NA	NA	NA
10.1.30	650575	656245	10	1	30	F	34.8	N	N	N	N	25/06/2014	Y	371	33.9	0.9	334
10.1.30	650575	656245	10	1	30	9999	NA	N	N	N	N	25/06/2014	N	NA	NA	NA	NA
10.1.31	650565	656249	10	1	31	9999	NA	N	N	N	N	25/06/2014	N	NA	NA	NA	NA
10.1.32	650555	656252	10	1	32	9999	NA	N	N	N	N	25/06/2014	N	NA	NA	NA	NA
10.1.33	650545	656256	10	1	33	9999	NA	N	N	N	N	25/06/2014	N	NA	NA	NA	NA
10.1.34	650535	656259	10	1	34	9999	NA	N	N	N	N	25/06/2014	N	NA	NA	NA	NA
10.1.35	650525	656263	10	1	35	9999	NA	N	N	N	N	25/06/2014	N	NA	NA	NA	NA
10.1.36	650514	656266	10	1	36	9999	NA	N	N	N	N	25/06/2014	N	NA	NA	NA	NA
10.1.37	650504	656270	10	1	37	9999	NA	N	N	N	N	25/06/2014	N	NA	NA	NA	NA
10.1.38	650494	656273	10	1	38	9999	NA	N	N	N	N	25/06/2014	N	NA	NA	NA	NA
10.1.39	650484	656277	10	1	39	9999	NA	N	N	N	N	25/06/2014	N	NA	NA	NA	NA
10.1.4	650434	656324	10	1	4	9999	NA	N	N	N	N	25/06/2014	N	NA	NA	NA	NA
10.1.40	650474	656280	10	1	40	9999	NA	N	N	N	N	25/06/2014	N	NA	NA	NA	NA
10.1.41	650464	656284	10	1	41	9999	NA	N	N	N	N	25/06/2014	N	NA	NA	NA	NA
10.1.42	650454	656288	10	1	42	9999	NA	N	N	N	N	25/06/2014	N	NA	NA	NA	NA
10.1.43	650444	656291	10	1	43	9999	NA	N	N	N	N	25/06/2014	N	NA	NA	NA	NA
10.1.44	650434	656295	10	1	44	9999	NA	N	N	N	N	25/06/2014	N	NA	NA	NA	NA
10.1.45	650424	656298	10	1	45	9999	NA	N	N	N	N	25/06/2014	N	NA	NA	NA	NA
10.1.46	650414	656302	10	1	46	9999	NA	N	N	N	N	25/06/2014	N	NA	NA	NA	NA
10.1.47	650404	656305	10	1	47	9999	NA	N	N	N	N	25/06/2014	N	NA	NA	NA	NA
10.1.48	650394	656309	10	1	48	9999	NA	N	N	N	N	25/06/2014	N	NA	NA	NA	NA
10.1.5	650444	656320	10	1	5	9999	NA	N	N	N	N	25/06/2014	N	NA	NA	NA	NA
10.1.6	650455	656317	10	1	6	9999	NA	N	N	N	N	25/06/2014	N	NA	NA	NA	NA
10.1.7	650465	656313	10	1	7	9999	NA	N	N	N	N	25/06/2014	N	NA	NA	NA	NA
10.1.8	650475	656310	10	1	8	9999	NA	N	N	N	N	25/06/2014	N	NA	NA	NA	NA
10.1.9	650485	656307	10	1	9	9999	NA	N	N	N	N	25/06/2014	N	NA	NA	NA	NA
10.2.1	650378	656276	10	2	1	9999	NA	N	N	N	N	25/06/2014	N	NA	NA	NA	NA
10.2.10	650470	656249	10	2	10	9999	NA	N	N	N	N	25/06/2014	N	NA	NA	NA	NA
10.2.11	650480	656246	10	2	11	9999	NA	N	N	N	N	25/06/2014	N	NA	NA	NA	NA
10.2.12	650491	656243	10	2	12	9999	NA	N	N	N	N	25/06/2014	N	NA	NA	NA	NA
10.2.13	650501	656241	10	2	13	F	43.1	N	N	N	N	25/06/2014	N	NA	NA	NA	NA
10.2.14	650511	656238	10	2	14	M	33.8	N	N	N	N	25/06/2014	N	NA	NA	NA	NA
10.2.15	650522	656235	10	2	15	F	29	N	N	N	N	25/06/2014	N	NA	NA	NA	NA
10.2.15	650522	656235	10	2	15	F	34.9	N	N	N	N	25/06/2014	N	NA	NA	NA	NA
10.2.15	650522	656235	10	2	15	F	37.8	N	N	N	N	25/06/2014	Y	342	36	1.8	281
10.2.15	650522	656235	10	2	15	F	38.2	N	Y	N	N	25/06/2014	N	NA	NA	NA	NA
10.2.15	650522	656235	10	2	15	F	38.3	N	N	N	N	25/06/2014	N	NA	NA	NA	NA
10.2.16	650532	656232	10	2	16	F	37	N	N	N	N	25/06/2014	N	NA	NA	NA	NA
10.2.17	650542	656229	10	2	17	F	34.6	N	N	N	N	25/06/2014	N	NA	NA	NA	NA
10.2.17	650542	656229	10	2	17	F	37.9	N	N	N	N	25/06/2014	N	NA	NA	NA	NA
10.2.17	650542	656229	10	2	17	F	38.6	N	N	N	N	25/06/2014	N	NA	NA	NA	NA
10.2.17	650542	656229	10	2	17	M	33.9	N	N	N	N	25/06/2014	N	NA	NA	NA	NA
10.2.18	650552	656226	10	2	18	M	37	N	N	N	N	25/06/2014	N	NA	NA	NA	NA
10.2.18	650552	656226	10	2	18	M	46.1	N	N	N	N	25/06/2014	N	NA	NA	NA	NA
10.2.19	650563	656223	10	2	19	F	43	N	N	N	N	25/06/2014	N	NA	NA	NA	NA
10.2.19	650563	656223	10	2	19	F	43.9	N	N	N	N	25/06/2014	N	NA	NA	NA	NA
10.2.2	650388	656273	10	2	2	9999	NA	N	N	N	N	25/06/2014	N	NA	NA	NA	NA
10.2.20	650573	656220	10	2	20	9999	NA	N	N	N	N	25/06/2014	N	NA	NA	NA	NA
10.2.21	650583	656217	10	2	21	F	39.1	N	N	N	N	25/06/2014	N	NA	NA	NA	NA
10.2.21	650583	656217	10	2	21	M	40.5	N	N	N	N	25/06/2014	Y	342	34.6	5.9	342
10.2.22	650594	656214	10	2	22	9999	NA	N	N	N	N	25/06/2014	N	NA	NA	NA	NA
10.2.23	650602	656206	10	2	23	F	34.7	N	N	N	N	25/06/2014	N	NA	NA	NA	NA
10.2.23	650602	656206	10	2	23	F	42.5	N	N	N	N	25/06/2014	N	NA	NA	NA	NA
10.2.24	650609	656194	10	2	24	F	36	N	N	N	N	25/06/2014	N	NA	NA	NA	NA
10.2.24	650609	656194	10	2	24	M	29	N	N	N	N	25/06/2014	N	NA	NA	NA	NA
10.2.25	650604	656189	10	2	25	F	35.2	N	N	N	N	25/06/2014	N	NA	NA	NA	NA
10.2.26	650593	656186	10	2	26	9999	NA	N	N	N	N	25/06/2014	N	NA	NA	NA	NA
10.2.27	650583	656184	10	2	27	F	32.3	N	N	N	N	25/06/2014	N	NA	NA	NA	NA
10.2.27	650583	656184	10	2	27	F	37.8	N	Y	N	N	25/06/2014	N	NA	NA	NA	NA
10.2.28	650573	656182	10	2	28	F	39.6	N	N	N	N	25/06/2014	N	NA	NA	NA	NA
10.2.28	650573	656182	10	2	28	M	37.8	N	N	N	N	25/06/2014	N	NA	NA	NA	NA
10.2.29	650562	656185	10	2	29	F	36.7	N	N	N	N	25/06/2014	N	NA	NA	NA	NA
10.2.3	650398	656270	10	2	3	9999	NA	N	N	N	N	25/06/2014	N	NA	NA	NA	NA
10.2.30	650552	656188	10	2	30	F	29.1	N	N	N	N	25/06/2014	N	NA	NA	NA	NA
10.2.30	650552	656188	10	2	30	F	33.7	N	N	N	N	25/06/2014	N	NA	NA	NA	NA
10.2.30	650552	656188	10	2	30	F	41.3	N	N	N	N	25/06/2014	N	NA	NA	NA	NA
10.2.30	650552	656188	10	2	30	F	48.8	N	N	N	N	25/06/2014	N	NA	NA	NA	NA
10.2.30	650552	656188	10	2	30	M	29.7	N	N	N	N	25/06/2014	N	NA	NA	NA	NA
10.2.31	650542	656191	10	2	31	F	39.2	N	N	N	N	25/06/2014	N	NA	NA	NA	NA
10.2.32	650531	656194	10	2	32	U	38.2	N	N	N	N	25/06/2014	N	NA	NA	NA	NA
10.2.32	650531	656194	10	2	32	F	25.7	N	N	N	N	25/06/2014	N	NA	NA	NA	NA
10.2.32	650531	656194	10	2	32	F	31.4	N	N	N	N	25/06/2014	N	NA	NA	NA	NA
10.2.32	650531	656194	10	2	32	F	31.7	N	N	N	N	25/06/2014	N	NA	NA	NA	NA
10.2.32	650531	656194	10	2	32	F	31.8	N	N	N	N	25/06/2014	N	NA	NA	NA	NA
10.2.32	650531	656194	10	2	32	F	35.2	N	Y	N	N	25/06/2014	N	NA	NA	NA	NA
10.2.32	650531	656194	10	2	32	F	39.9	N	Y	N	N	25/06/2014	N	NA	NA	NA	NA
10.2.32	650531	656194	10	2	32	F	41.8	N	N	N	N	25/06/2014	N	NA	NA	NA	NA
10.2.32	650531	656194	10	2	32	M	31.7	N	N	N	N	25/06/2014	N	NA	NA	NA	NA
10.2.32	650531	656194	10	2	32	M	32.6	N	N	N	N	25/06/2014	N	NA	NA	NA	NA
10.2.32	650531	656194	10	2	32	M	35.9	N	N	N	N	25/06/2014	N	NA	NA	NA	NA
10.2.32	650531	656194	10	2	32	M	37.1	N	N	N	N	25/06/2014	N	NA	NA	NA	NA
10.2.33	650521	656197	10	2	33	F	38.1	N	N	N	N	25/06/2014	N	NA	NA	NA	NA
10.2.34	650511	656200	10	2	34	F	38.7	N	N	N	N	25/06/2014	N	NA	NA	NA	NA
10.2.34	650511	656200	10	2	34	M	54.3	N	N	N	N	25/06/2014	N	NA	NA	NA	NA
10.2.35	650501	656203	10	2	35	M	36.7	N	N	N	N	25/06/2014	N	NA	NA	NA	NA
10.2.36	650490	656205	10	2	36	F	37.3	N	N	N	N	25/06/2014	N	NA	NA	NA	NA
10.2.37	650480	656208	10	2	37	M	34.3	N	Y	N	N	25/06/2014	N	NA	NA	NA	NA
10.2.38	650470	656211	10	2	38	9999	NA	N	N	N	N	25/06/2014	N	NA	NA	NA	NA
10.2.38	650470	656211	10	2	38	F	31.3	N	N	N	N	25/06/2014	N	NA	NA	NA	NA
10.2.38	650470	656211	10	2	38	F	37	N	N	N	N	25/06/2014	N	NA	NA	NA	NA
10.2.38	650470	656211	10	2	38	F	39.2	N	N	N	N	25/06/2014	N	NA	NA	NA	NA
10.2.38	650470	656211	10	2	38	M	35.7	N	N	N	N	25/06/2014	N	NA	NA	NA	NA
10.2.39	650460	656214	10	2	39	F	25.1	N	N	N	N	25/06/2014	N	NA	NA	NA	NA
10.2.39	650460	656214	10	2	39	M	46.5	N	N	N	N	25/06/2014	N	NA	NA	NA	NA
10.2.4	650409	656267	10	2	4	9999	NA	N	N	N	N	25/06/2014	N	NA	NA	NA	NA
10.2.40	650449	656217	10	2	40	F	35.7	N	N	N	N	25/06/2014	N	NA	NA	NA	NA
10.2.41	650439	656220	10	2	41	9999	NA	N	N	N	N	25/06/2014	N	NA	NA	NA	NA
10.2.42	650429	656223	10	2	42	F	44	N	N	N	N	25/06/2014	N	NA	NA	NA	NA
10.2.43	650418	656226	10	2	43	F	34	N	N	N	N	25/06/2014	N	NA	NA	NA	NA
10.2.44	650408	656229	10	2	44	F	45.2	N	N	N	N	25/06/2014	N	NA	NA	NA	NA
10.2.45	650398	656232	10	2	45	F	35.7	N	N	N	N	25/06/2014	Y	371	33.4	2.3	157
10.2.45	650398	656232	10	2	45	F	37.6	N	N	N	N	25/06/2014	N	NA	NA	NA	NA
10.2.45	650398	656232	10	2	45	M	41.5	N	N	N	N	25/06/2014	Y	371	37.2	4.3	157
10.2.46	650388	656235	10	2	46	F	36	N	N	N	N	25/06/2014	N	NA	NA	NA	NA
10.2.47	650377	656237	10	2	47	9999	NA	N	N	N	N	25/06/2014	N	NA	NA	NA	NA
10.2.48	650367	656240	10	2	48	9999	NA	N	N	N	N	25/06/2014	N	NA	NA	NA	NA
10.2.5	650419	656264	10	2	5	9999	NA	N	N	N	N	25/06/2014	N	NA	NA	NA	NA
10.2.6	650429	656261	10	2	6	9999	NA	N	N	N	N	25/06/2014	N	NA	NA	NA	NA
10.2.7	650439	656258	10	2	7	9999	NA	N	N	N	N	25/06/2014	N	NA	NA	NA	NA
10.2.8	650450	656255	10	2	8	9999	NA	N	N	N	N	25/06/2014	N	NA	NA	NA	NA
10.2.9	650460	656252	10	2	9	F	40.8	N	N	N	N	25/06/2014	N	NA	NA	NA	NA
10.2.9	650460	656252	10	2	9	F	41.4	N	N	N	N	25/06/2014	N	NA	NA	NA	NA
10.2.9	650460	656252	10	2	9	M	52.2	N	N	N	N	25/06/2014	N	NA	NA	NA	NA
10.3.1	650266	656217	10	3	1	F	36.1	N	N	N	N	25/06/2014	N	NA	NA	NA	NA
10.3.1	650266	656217	10	3	1	F	36.2	N	N	N	N	25/06/2014	N	NA	NA	NA	NA
10.3.10	650375	656194	10	3	10	M	32.1	N	N	N	N	25/06/2014	N	NA	NA	NA	NA
10.3.11	650387	656192	10	3	11	9999	NA	N	N	N	N	25/06/2014	N	NA	NA	NA	NA
10.3.12	650399	656189	10	3	12	9999	NA	N	N	N	N	25/06/2014	N	NA	NA	NA	NA
10.3.13	650411	656187	10	3	13	F	39.8	N	N	N	N	25/06/2014	N	NA	NA	NA	NA
10.3.14	650423	656184	10	3	14	F	34.9	N	N	N	N	25/06/2014	N	NA	NA	NA	NA
10.3.15	650435	656182	10	3	15	F	30.6	N	N	N	N	25/06/2014	N	NA	NA	NA	NA
10.3.15	650435	656182	10	3	15	F	35.2	N	N	N	N	25/06/2014	N	NA	NA	NA	NA
10.3.16	650447	656179	10	3	16	F	35.5	N	Y	N	N	25/06/2014	N	NA	NA	NA	NA
10.3.17	650459	656176	10	3	17	9999	NA	N	N	N	N	25/06/2014	N	NA	NA	NA	NA
10.3.18	650471	656174	10	3	18	F	41.4	N	N	N	N	25/06/2014	N	NA	NA	NA	NA
10.3.19	650483	656171	10	3	19	F	35.8	N	N	N	N	25/06/2014	N	NA	NA	NA	NA
10.3.19	650483	656171	10	3	19	F	36	N	N	N	N	25/06/2014	N	NA	NA	NA	NA
10.3.19	650483	656171	10	3	19	M	33.1	N	N	N	N	25/06/2014	N	NA	NA	NA	NA
10.3.2	650278	656215	10	3	2	F	31.5	N	N	N	N	25/06/2014	N	NA	NA	NA	NA
10.3.2	650278	656215	10	3	2	F	36	N	N	N	N	25/06/2014	N	NA	NA	NA	NA
10.3.2	650278	656215	10	3	2	F	36.9	N	N	N	N	25/06/2014	N	NA	NA	NA	NA
10.3.2	650278	656215	10	3	2	F	38.8	N	N	N	N	25/06/2014	N	NA	NA	NA	NA
10.3.2	650278	656215	10	3	2	F	45.6	N	N	N	N	25/06/2014	N	NA	NA	NA	NA
10.3.20	650495	656169	10	3	20	F	35.6	N	N	N	N	25/06/2014	N	NA	NA	NA	NA
10.3.20	650495	656169	10	3	20	F	35.8	N	N	N	N	25/06/2014	N	NA	NA	NA	NA
10.3.20	650495	656169	10	3	20	F	37.6	N	N	N	N	25/06/2014	N	NA	NA	NA	NA
10.3.21	650507	656166	10	3	21	F	48.4	N	Y	N	N	25/06/2014	N	NA	NA	NA	NA
10.3.21	650507	656166	10	3	21	M	35	N	N	N	N	25/06/2014	N	NA	NA	NA	NA
10.3.22	650519	656164	10	3	22	9999	NA	N	N	N	N	25/06/2014	N	NA	NA	NA	NA
10.3.23	650531	656161	10	3	23	9999	NA	N	N	N	N	25/06/2014	N	NA	NA	NA	NA
10.3.24	650543	656159	10	3	24	F	37.7	N	N	N	N	25/06/2014	N	NA	NA	NA	NA
10.3.25	650556	656156	10	3	25	9999	NA	N	N	N	N	25/06/2014	N	NA	NA	NA	NA
10.3.26	650568	656154	10	3	26	F	37.3	N	N	N	N	25/06/2014	N	NA	NA	NA	NA
10.3.27	650578	656146	10	3	27	F	38.4	N	Y	N	N	25/06/2014	N	NA	NA	NA	NA
10.3.28	650585	656130	10	3	28	F	36.4	N	N	N	N	25/06/2014	N	NA	NA	NA	NA
10.3.29	650573	656126	10	3	29	9999	NA	N	N	N	N	25/06/2014	N	NA	NA	NA	NA
10.3.3	650291	656212	10	3	3	F	29.5	N	N	N	N	25/06/2014	Y	371	28.6	0.9	51
10.3.3	650291	656212	10	3	3	F	31.5	N	N	N	N	25/06/2014	N	NA	NA	NA	NA
10.3.3	650291	656212	10	3	3	F	34.1	N	N	N	N	25/06/2014	N	NA	NA	NA	NA
10.3.3	650291	656212	10	3	3	F	37	N	N	N	N	25/06/2014	N	NA	NA	NA	NA
10.3.3	650291	656212	10	3	3	F	39	N	Y	N	N	25/06/2014	N	NA	NA	NA	NA
10.3.30	650561	656122	10	3	30	9999	NA	N	N	N	N	25/06/2014	N	NA	NA	NA	NA
10.3.31	650549	656119	10	3	31	F	32.5	N	N	N	N	25/06/2014	N	NA	NA	NA	NA
10.3.31	650549	656119	10	3	31	F	37.5	N	N	N	N	25/06/2014	N	NA	NA	NA	NA
10.3.32	650537	656121	10	3	32	F	44.2	N	N	N	N	25/06/2014	N	NA	NA	NA	NA
10.3.33	650525	656124	10	3	33	9999	NA	N	N	N	N	25/06/2014	N	NA	NA	NA	NA
10.3.34	650513	656128	10	3	34	F	33.1	N	N	N	N	25/06/2014	N	NA	NA	NA	NA
10.3.34	650513	656128	10	3	34	M	55.4	N	Y	N	N	25/06/2014	N	NA	NA	NA	NA
10.3.35	650501	656131	10	3	35	9999	NA	N	N	N	N	25/06/2014	N	NA	NA	NA	NA
10.3.36	650489	656135	10	3	36	9999	NA	N	N	N	N	25/06/2014	N	NA	NA	NA	NA
10.3.37	650477	656138	10	3	37	9999	NA	N	N	N	N	25/06/2014	N	NA	NA	NA	NA
10.3.38	650465	656142	10	3	38	F	37.9	N	N	N	N	25/06/2014	N	NA	NA	NA	NA
10.3.39	650453	656145	10	3	39	F	36.9	N	N	N	N	25/06/2014	N	NA	NA	NA	NA
10.3.4	650303	656209	10	3	4	F	32.6	N	N	N	N	25/06/2014	N	NA	NA	NA	NA
10.3.4	650303	656209	10	3	4	M	28.5	N	N	N	N	25/06/2014	N	NA	NA	NA	NA
10.3.4	650303	656209	10	3	4	M	32.8	N	N	N	N	25/06/2014	N	NA	NA	NA	NA
10.3.4	650303	656209	10	3	4	M	33.1	N	N	N	N	25/06/2014	N	NA	NA	NA	NA
10.3.4	650303	656209	10	3	4	M	34	N	N	N	N	25/06/2014	N	NA	NA	NA	NA
10.3.4	650303	656209	10	3	4	M	37.5	N	N	N	N	25/06/2014	N	NA	NA	NA	NA
10.3.40	650441	656149	10	3	40	F	35.7	N	N	N	N	25/06/2014	N	NA	NA	NA	NA
10.3.41	650429	656152	10	3	41	F	38.8	N	N	N	N	25/06/2014	N	NA	NA	NA	NA
10.3.41	650429	656152	10	3	41	M	44.5	N	Y	N	N	25/06/2014	N	NA	NA	NA	NA
10.3.42	650417	656156	10	3	42	M	58.7	N	Y	N	N	25/06/2014	N	NA	NA	NA	NA
10.3.43	650406	656159	10	3	43	F	32.5	N	N	N	N	25/06/2014	N	NA	NA	NA	NA
10.3.43	650406	656159	10	3	43	M	35	N	Y	N	N	25/06/2014	N	NA	NA	NA	NA
10.3.44	650394	656162	10	3	44	F	38.5	N	N	N	N	25/06/2014	Y	342	36.5	2	165
10.3.44	650394	656162	10	3	44	F	38.8	N	N	N	N	25/06/2014	N	NA	NA	NA	NA
10.3.45	650382	656166	10	3	45	M	32.5	N	N	N	N	25/06/2014	N	NA	NA	NA	NA
10.3.46	650370	656169	10	3	46	F	34.1	N	N	N	N	25/06/2014	N	NA	NA	NA	NA
10.3.47	650358	656173	10	3	47	F	35.4	N	N	N	N	25/06/2014	N	NA	NA	NA	NA
10.3.47	650358	656173	10	3	47	F	40.2	N	Y	N	N	25/06/2014	N	NA	NA	NA	NA
10.3.48	650346	656176	10	3	48	9999	NA	N	N	N	N	25/06/2014	N	NA	NA	NA	NA
10.3.5	650315	656207	10	3	5	9999	NA	N	N	N	N	25/06/2014	N	NA	NA	NA	NA
10.3.6	650327	656204	10	3	6	F	29.7	N	N	N	N	25/06/2014	N	NA	NA	NA	NA
10.3.6	650327	656204	10	3	6	F	38.7	N	N	N	N	25/06/2014	N	NA	NA	NA	NA
10.3.6	650327	656204	10	3	6	M	38.3	N	N	N	N	25/06/2014	Y	385	34	4.3	88
10.3.7	650339	656202	10	3	7	F	36.7	N	N	N	N	25/06/2014	N	NA	NA	NA	NA
10.3.7	650339	656202	10	3	7	M	37.4	N	N	N	N	25/06/2014	Y	385	33.7	3.7	101
10.3.8	650351	656199	10	3	8	9999	NA	N	N	N	N	25/06/2014	N	NA	NA	NA	NA
10.3.9	650363	656197	10	3	9	F	33.1	N	N	N	N	25/06/2014	N	NA	NA	NA	NA
10.4.1	650326	656162	10	4	1	9999	NA	N	N	N	N	25/06/2014	N	NA	NA	NA	NA
10.4.10	650422	656130	10	4	10	9999	NA	N	N	N	N	25/06/2014	N	NA	NA	NA	NA
10.4.11	650432	656126	10	4	11	9999	NA	N	N	N	N	25/06/2014	N	NA	NA	NA	NA
10.4.12	650443	656122	10	4	12	F	30	N	N	N	N	25/06/2014	N	NA	NA	NA	NA
10.4.12	650443	656122	10	4	12	M	35.2	N	N	N	N	25/06/2014	N	NA	NA	NA	NA
10.4.13	650454	656119	10	4	13	9999	NA	N	N	N	N	25/06/2014	N	NA	NA	NA	NA
10.4.14	650464	656115	10	4	14	F	32.5	N	N	N	N	25/06/2014	N	NA	NA	NA	NA
10.4.14	650464	656115	10	4	14	M	30.8	N	N	N	N	25/06/2014	N	NA	NA	NA	NA
10.4.15	650475	656112	10	4	15	M	36	N	N	N	N	25/06/2014	N	NA	NA	NA	NA
10.4.16	650486	656108	10	4	16	F	33.8	N	N	N	N	25/06/2014	N	NA	NA	NA	NA
10.4.17	650496	656104	10	4	17	F	36.8	N	N	N	N	25/06/2014	N	NA	NA	NA	NA
10.4.17	650496	656104	10	4	17	F	37.8	N	N	N	N	25/06/2014	N	NA	NA	NA	NA
10.4.18	650507	656101	10	4	18	F	30.3	N	N	N	N	25/06/2014	N	NA	NA	NA	NA
10.4.18	650507	656101	10	4	18	F	35.1	N	Y	N	N	25/06/2014	N	NA	NA	NA	NA
10.4.18	650507	656101	10	4	18	F	35.2	N	N	N	N	25/06/2014	N	NA	NA	NA	NA
10.4.18	650507	656101	10	4	18	F	35.9	N	N	N	N	25/06/2014	N	NA	NA	NA	NA
10.4.18	650507	656101	10	4	18	F	37.2	N	Y	N	N	25/06/2014	N	NA	NA	NA	NA
10.4.18	650507	656101	10	4	18	M	35.7	N	N	N	N	25/06/2014	N	NA	NA	NA	NA
10.4.19	650518	656097	10	4	19	F	30.5	N	N	N	N	25/06/2014	N	NA	NA	NA	NA
10.4.19	650518	656097	10	4	19	F	39	N	N	N	N	25/06/2014	N	NA	NA	NA	NA
10.4.19	650518	656097	10	4	19	M	33.8	N	N	N	N	25/06/2014	N	NA	NA	NA	NA
10.4.19	650518	656097	10	4	19	M	36.2	N	N	N	N	25/06/2014	N	NA	NA	NA	NA
10.4.2	650336	656159	10	4	2	9999	NA	N	N	N	N	25/06/2014	N	NA	NA	NA	NA
10.4.20	650528	656093	10	4	20	F	42.4	N	N	N	N	25/06/2014	N	NA	NA	NA	NA
10.4.20	650528	656093	10	4	20	M	31.2	N	N	N	N	25/06/2014	N	NA	NA	NA	NA
10.4.20	650528	656093	10	4	20	M	35.3	N	N	N	N	25/06/2014	N	NA	NA	NA	NA
10.4.20	650528	656093	10	4	20	M	36	N	N	N	N	25/06/2014	N	NA	NA	NA	NA
10.4.21	650539	656090	10	4	21	F	37	N	N	N	N	25/06/2014	N	NA	NA	NA	NA
10.4.22	650550	656086	10	4	22	9999	NA	N	N	N	N	25/06/2014	N	NA	NA	NA	NA
10.4.22	650550	656086	10	4	22	F	29.9	N	N	N	N	25/06/2014	N	NA	NA	NA	NA
10.4.22	650550	656086	10	4	22	F	35.6	N	N	N	N	25/06/2014	N	NA	NA	NA	NA
10.4.22	650550	656086	10	4	22	F	37.1	N	N	N	N	25/06/2014	N	NA	NA	NA	NA
10.4.22	650550	656086	10	4	22	F	38.6	N	N	N	N	25/06/2014	N	NA	NA	NA	NA
10.4.22	650550	656086	10	4	22	M	31	N	N	N	N	25/06/2014	N	NA	NA	NA	NA
10.4.22	650550	656086	10	4	22	M	39.2	N	N	N	N	25/06/2014	Y	342	32.7	6.5	339
10.4.23	650560	656082	10	4	23	9999	NA	N	N	N	N	25/06/2014	N	NA	NA	NA	NA
10.4.24	650569	656073	10	4	24	9999	NA	N	N	N	N	25/06/2014	N	NA	NA	NA	NA
10.4.25	650572	656065	10	4	25	9999	NA	N	N	N	N	25/06/2014	N	NA	NA	NA	NA
10.4.26	650561	656064	10	4	26	F	37.1	N	Y	N	N	25/06/2014	N	NA	NA	NA	NA
10.4.26	650561	656064	10	4	26	F	37.7	N	N	N	N	25/06/2014	N	NA	NA	NA	NA
10.4.27	650550	656064	10	4	27	F	33.8	N	N	N	N	25/06/2014	Y	371	32.5	1.3	349
10.4.27	650550	656064	10	4	27	F	36.5	N	N	N	N	25/06/2014	N	NA	NA	NA	NA
10.4.27	650550	656064	10	4	27	F	39.1	N	N	N	N	25/06/2014	N	NA	NA	NA	NA
10.4.27	650550	656064	10	4	27	F	40.2	N	N	N	N	25/06/2014	N	NA	NA	NA	NA
10.4.28	650539	656065	10	4	28	F	29.1	N	N	N	N	25/06/2014	N	NA	NA	NA	NA
10.4.28	650539	656065	10	4	28	F	45.8	N	Y	N	N	25/06/2014	N	NA	NA	NA	NA
10.4.28	650539	656065	10	4	28	M	34.6	N	N	N	N	25/06/2014	N	NA	NA	NA	NA
10.4.29	650529	656069	10	4	29	F	36.5	N	N	N	N	25/06/2014	N	NA	NA	NA	NA
10.4.3	650347	656155	10	4	3	F	35.6	N	N	N	N	25/06/2014	N	NA	NA	NA	NA
10.4.3	650347	656155	10	4	3	F	36.7	N	Y	N	N	25/06/2014	N	NA	NA	NA	NA
10.4.3	650347	656155	10	4	3	M	30.4	N	N	N	N	25/06/2014	N	NA	NA	NA	NA
10.4.30	650518	656072	10	4	30	F	31.9	N	N	N	N	25/06/2014	N	NA	NA	NA	NA
10.4.30	650518	656072	10	4	30	F	37	N	N	N	N	25/06/2014	N	NA	NA	NA	NA
10.4.31	650507	656076	10	4	31	F	32.6	N	N	N	N	25/06/2014	N	NA	NA	NA	NA
10.4.31	650507	656076	10	4	31	F	36.5	N	Y	N	N	25/06/2014	N	NA	NA	NA	NA
10.4.31	650507	656076	10	4	31	F	38.4	N	N	N	N	25/06/2014	N	NA	NA	NA	NA
10.4.31	650507	656076	10	4	31	F	44.5	N	N	N	N	25/06/2014	N	NA	NA	NA	NA
10.4.32	650497	656079	10	4	32	F	38.7	N	N	N	N	25/06/2014	N	NA	NA	NA	NA
10.4.33	650486	656083	10	4	33	F	35.7	N	N	N	N	25/06/2014	N	NA	NA	NA	NA
10.4.34	650475	656086	10	4	34	M	34.9	N	N	N	N	25/06/2014	N	NA	NA	NA	NA
10.4.35	650465	656090	10	4	35	F	35.8	N	N	N	N	25/06/2014	N	NA	NA	NA	NA
10.4.35	650465	656090	10	4	35	F	36.6	N	N	N	N	25/06/2014	N	NA	NA	NA	NA
10.4.36	650454	656093	10	4	36	M	31	N	N	N	N	25/06/2014	N	NA	NA	NA	NA
10.4.37	650443	656097	10	4	37	F	39	N	N	N	N	25/06/2014	N	NA	NA	NA	NA
10.4.38	650433	656100	10	4	38	F	32.3	N	N	N	N	25/06/2014	N	NA	NA	NA	NA
10.4.39	650422	656104	10	4	39	F	39.1	N	Y	N	N	25/06/2014	N	NA	NA	NA	NA
10.4.4	650358	656151	10	4	4	M	36.8	N	N	N	N	25/06/2014	N	NA	NA	NA	NA
10.4.40	650411	656107	10	4	40	9999	NA	N	N	N	N	25/06/2014	N	NA	NA	NA	NA
10.4.41	650401	656111	10	4	41	9999	NA	N	N	N	N	25/06/2014	N	NA	NA	NA	NA
10.4.42	650390	656114	10	4	42	F	32.4	N	N	N	N	25/06/2014	N	NA	NA	NA	NA
10.4.42	650390	656114	10	4	42	F	37.3	N	N	N	N	25/06/2014	N	NA	NA	NA	NA
10.4.42	650390	656114	10	4	42	M	29.1	N	N	N	N	25/06/2014	N	NA	NA	NA	NA
10.4.43	650379	656118	10	4	43	F	31.6	N	N	N	N	25/06/2014	N	NA	NA	NA	NA
10.4.43	650379	656118	10	4	43	F	36.4	N	N	N	N	25/06/2014	N	NA	NA	NA	NA
10.4.43	650379	656118	10	4	43	F	41	N	N	N	N	25/06/2014	N	NA	NA	NA	NA
10.4.44	650368	656122	10	4	44	9999	NA	N	N	N	N	25/06/2014	N	NA	NA	NA	NA
10.4.45	650358	656125	10	4	45	F	35.6	N	N	N	N	25/06/2014	N	NA	NA	NA	NA
10.4.45	650358	656125	10	4	45	F	36.4	N	N	N	N	25/06/2014	N	NA	NA	NA	NA
10.4.45	650358	656125	10	4	45	M	38.8	N	Y	N	N	25/06/2014	N	NA	NA	NA	NA
10.4.46	650347	656129	10	4	46	M	37.6	N	N	N	N	25/06/2014	Y	371	31.6	6	144
10.4.46	650347	656129	10	4	46	M	56.2	N	N	N	N	25/06/2014	N	NA	NA	NA	NA
10.4.47	650336	656132	10	4	47	9999	NA	N	N	N	N	25/06/2014	N	NA	NA	NA	NA
10.4.48	650326	656136	10	4	48	9999	NA	N	N	N	N	25/06/2014	N	NA	NA	NA	NA
10.4.5	650368	656148	10	4	5	9999	NA	N	N	N	N	25/06/2014	N	NA	NA	NA	NA
10.4.6	650379	656144	10	4	6	9999	NA	N	N	N	N	25/06/2014	N	NA	NA	NA	NA
10.4.7	650390	656141	10	4	7	F	29.4	N	N	N	N	25/06/2014	N	NA	NA	NA	NA
10.4.7	650390	656141	10	4	7	F	37.3	N	N	N	N	25/06/2014	N	NA	NA	NA	NA
10.4.8	650400	656137	10	4	8	F	38	N	N	N	N	25/06/2014	N	NA	NA	NA	NA
10.4.9	650411	656133	10	4	9	F	37.4	N	Y	N	N	25/06/2014	N	NA	NA	NA	NA
10.4.9	650411	656133	10	4	9	F	39.7	N	Y	N	N	25/06/2014	N	NA	NA	NA	NA
10.5.1	650326	656085	10	5	1	F	35.2	N	Y	N	N	25/06/2014	N	NA	NA	NA	NA
10.5.10	650428	656060	10	5	10	9999	NA	N	N	N	N	25/06/2014	N	NA	NA	NA	NA
10.5.11	650439	656057	10	5	11	F	35.2	N	N	N	N	25/06/2014	N	NA	NA	NA	NA
10.5.11	650439	656057	10	5	11	F	35.6	N	N	N	N	25/06/2014	N	NA	NA	NA	NA
10.5.11	650439	656057	10	5	11	F	36.4	N	N	N	N	25/06/2014	N	NA	NA	NA	NA
10.5.11	650439	656057	10	5	11	F	43.8	N	N	N	N	25/06/2014	N	NA	NA	NA	NA
10.5.12	650450	656054	10	5	12	F	30.4	N	N	N	N	25/06/2014	N	NA	NA	NA	NA
10.5.12	650450	656054	10	5	12	F	35.8	N	N	N	N	25/06/2014	N	NA	NA	NA	NA
10.5.13	650462	656051	10	5	13	F	37.1	N	Y	N	N	25/06/2014	N	NA	NA	NA	NA
10.5.13	650462	656051	10	5	13	M	35	N	N	N	N	25/06/2014	N	NA	NA	NA	NA
10.5.14	650473	656049	10	5	14	F	34.9	N	N	N	N	25/06/2014	N	NA	NA	NA	NA
10.5.15	650484	656046	10	5	15	F	34.5	N	N	N	N	25/06/2014	N	NA	NA	NA	NA
10.5.15	650484	656046	10	5	15	F	37.5	N	N	N	N	25/06/2014	N	NA	NA	NA	NA
10.5.15	650484	656046	10	5	15	F	37.6	N	Y	N	N	25/06/2014	N	NA	NA	NA	NA
10.5.16	650496	656043	10	5	16	F	36.7	N	N	N	N	25/06/2014	N	NA	NA	NA	NA
10.5.16	650496	656043	10	5	16	F	40	N	N	N	N	25/06/2014	N	NA	NA	NA	NA
10.5.16	650496	656043	10	5	16	M	36.4	N	N	N	N	25/06/2014	N	NA	NA	NA	NA
10.5.17	650507	656040	10	5	17	9999	NA	N	N	N	N	25/06/2014	N	NA	NA	NA	NA
10.5.18	650518	656037	10	5	18	F	28.6	N	N	N	N	25/06/2014	N	NA	NA	NA	NA
10.5.18	650518	656037	10	5	18	F	36	N	N	N	N	25/06/2014	N	NA	NA	NA	NA
10.5.18	650518	656037	10	5	18	F	40.5	N	N	N	N	25/06/2014	N	NA	NA	NA	NA
10.5.19	650529	656034	10	5	19	F	37.5	N	N	N	N	25/06/2014	N	NA	NA	NA	NA
10.5.2	650337	656083	10	5	2	F	36.5	N	N	N	N	25/06/2014	N	NA	NA	NA	NA
10.5.20	650541	656032	10	5	20	F	37.6	N	Y	N	N	25/06/2014	N	NA	NA	NA	NA
10.5.21	650552	656029	10	5	21	F	35.6	N	Y	N	N	25/06/2014	N	NA	NA	NA	NA
10.5.21	650552	656029	10	5	21	F	43.5	N	N	N	N	25/06/2014	N	NA	NA	NA	NA
10.5.22	650563	656026	10	5	22	F	35.6	N	Y	N	N	25/06/2014	N	NA	NA	NA	NA
10.5.23	650575	656023	10	5	23	F	36.6	N	N	N	N	25/06/2014	N	NA	NA	NA	NA
10.5.23	650575	656023	10	5	23	F	37.7	N	N	N	N	25/06/2014	N	NA	NA	NA	NA
10.5.24	650586	656020	10	5	24	F	34.8	N	N	N	N	25/06/2014	N	NA	NA	NA	NA
10.5.24	650586	656020	10	5	24	F	41.1	N	N	N	N	25/06/2014	N	NA	NA	NA	NA
10.5.24	650586	656020	10	5	24	M	35.3	N	N	N	N	25/06/2014	N	NA	NA	NA	NA
10.5.25	650592	656004	10	5	25	9999	NA	N	N	N	N	25/06/2014	N	NA	NA	NA	NA
10.5.26	650585	655999	10	5	26	9999	NA	N	N	N	N	25/06/2014	N	NA	NA	NA	NA
10.5.27	650573	655997	10	5	27	9999	NA	N	N	N	N	25/06/2014	N	NA	NA	NA	NA
10.5.28	650562	656000	10	5	28	9999	NA	N	N	N	N	25/06/2014	N	NA	NA	NA	NA
10.5.29	650551	656004	10	5	29	9999	NA	N	N	N	N	25/06/2014	N	NA	NA	NA	NA
10.5.3	650349	656080	10	5	3	F	38.6	N	N	N	N	25/06/2014	N	NA	NA	NA	NA
10.5.30	650540	656007	10	5	30	F	45.4	N	Y	N	N	25/06/2014	N	NA	NA	NA	NA
10.5.31	650528	656011	10	5	31	9999	NA	N	N	N	N	25/06/2014	N	NA	NA	NA	NA
10.5.32	650517	656014	10	5	32	9999	NA	N	N	N	N	25/06/2014	N	NA	NA	NA	NA
10.5.33	650506	656018	10	5	33	9999	NA	N	N	N	N	25/06/2014	N	NA	NA	NA	NA
10.5.34	650495	656021	10	5	34	9999	NA	N	N	N	N	25/06/2014	N	NA	NA	NA	NA
10.5.35	650483	656025	10	5	35	F	49	N	N	N	N	25/06/2014	N	NA	NA	NA	NA
10.5.36	650472	656028	10	5	36	F	36.1	N	N	N	N	25/06/2014	N	NA	NA	NA	NA
10.5.37	650461	656032	10	5	37	F	32.8	N	N	N	N	25/06/2014	N	NA	NA	NA	NA
10.5.37	650461	656032	10	5	37	F	37.1	N	N	N	N	25/06/2014	N	NA	NA	NA	NA
10.5.37	650461	656032	10	5	37	M	30.6	N	N	N	N	25/06/2014	N	NA	NA	NA	NA
10.5.38	650450	656035	10	5	38	F	34.4	N	N	N	N	25/06/2014	N	NA	NA	NA	NA
10.5.39	650438	656039	10	5	39	F	38	N	N	N	N	25/06/2014	N	NA	NA	NA	NA
10.5.4	650360	656077	10	5	4	9999	NA	N	N	N	N	25/06/2014	N	NA	NA	NA	NA
10.5.40	650427	656043	10	5	40	9999	NA	N	N	N	N	25/06/2014	N	NA	NA	NA	NA
10.5.41	650416	656046	10	5	41	F	37.7	N	N	N	N	25/06/2014	N	NA	NA	NA	NA
10.5.41	650416	656046	10	5	41	F	43	N	N	N	N	25/06/2014	N	NA	NA	NA	NA
10.5.42	650405	656050	10	5	42	9999	NA	N	N	N	N	25/06/2014	N	NA	NA	NA	NA
10.5.43	650394	656053	10	5	43	F	32.4	N	N	N	N	25/06/2014	N	NA	NA	NA	NA
10.5.43	650394	656053	10	5	43	F	35	N	N	N	N	25/06/2014	N	NA	NA	NA	NA
10.5.43	650394	656053	10	5	43	M	35.9	N	N	N	N	25/06/2014	N	NA	NA	NA	NA
10.5.44	650382	656057	10	5	44	9999	NA	N	N	N	N	25/06/2014	N	NA	NA	NA	NA
10.5.45	650371	656060	10	5	45	9999	NA	N	N	N	N	25/06/2014	N	NA	NA	NA	NA
10.5.46	650360	656064	10	5	46	9999	NA	N	N	N	N	25/06/2014	N	NA	NA	NA	NA
10.5.47	650349	656067	10	5	47	F	34.1	N	Y	N	N	25/06/2014	N	NA	NA	NA	NA
10.5.47	650349	656067	10	5	47	F	36.3	N	N	N	N	25/06/2014	N	NA	NA	NA	NA
10.5.47	650349	656067	10	5	47	M	38	N	N	N	N	25/06/2014	N	NA	NA	NA	NA
10.5.48	650337	656071	10	5	48	9999	NA	N	N	N	N	25/06/2014	N	NA	NA	NA	NA
10.5.5	650371	656074	10	5	5	F	41.6	N	N	N	N	25/06/2014	N	NA	NA	NA	NA
10.5.6	650382	656071	10	5	6	F	38.5	N	N	N	N	25/06/2014	N	NA	NA	NA	NA
10.5.7	650394	656068	10	5	7	F	32.9	N	N	N	N	25/06/2014	N	NA	NA	NA	NA
10.5.7	650394	656068	10	5	7	F	36.4	N	N	N	N	25/06/2014	N	NA	NA	NA	NA
10.5.7	650394	656068	10	5	7	F	37.1	N	N	N	N	25/06/2014	N	NA	NA	NA	NA
10.5.7	650394	656068	10	5	7	F	38	N	N	N	N	25/06/2014	N	NA	NA	NA	NA
10.5.7	650394	656068	10	5	7	F	39.3	N	N	N	N	25/06/2014	N	NA	NA	NA	NA
10.5.7	650394	656068	10	5	7	F	41.2	N	N	N	N	25/06/2014	N	NA	NA	NA	NA
10.5.8	650405	656066	10	5	8	F	35.9	N	N	N	N	25/06/2014	N	NA	NA	NA	NA
10.5.8	650405	656066	10	5	8	F	36.5	N	N	N	N	25/06/2014	N	NA	NA	NA	NA
10.5.8	650405	656066	10	5	8	F	38.1	N	N	N	N	25/06/2014	N	NA	NA	NA	NA
10.5.8	650405	656066	10	5	8	M	43	N	Y	N	N	25/06/2014	N	NA	NA	NA	NA
10.5.9	650416	656063	10	5	9	9999	NA	N	N	N	N	25/06/2014	N	NA	NA	NA	NA
11.1.1	650581	656282	11	1	1	9999	NA	N	N	N	N	02/07/2014	N	NA	NA	NA	NA
11.1.10	650504	656299	11	1	10	9999	NA	N	N	N	N	02/07/2014	N	NA	NA	NA	NA
11.1.11	650496	656301	11	1	11	9999	NA	N	N	N	N	02/07/2014	N	NA	NA	NA	NA
11.1.12	650487	656303	11	1	12	9999	NA	N	N	N	N	02/07/2014	N	NA	NA	NA	NA
11.1.13	650479	656305	11	1	13	9999	NA	N	N	N	N	02/07/2014	N	NA	NA	NA	NA
11.1.14	650470	656307	11	1	14	9999	NA	N	N	N	N	02/07/2014	N	NA	NA	NA	NA
11.1.15	650462	656309	11	1	15	9999	NA	N	N	N	N	02/07/2014	N	NA	NA	NA	NA
11.1.16	650453	656311	11	1	16	9999	NA	N	N	N	N	02/07/2014	N	NA	NA	NA	NA
11.1.17	650445	656313	11	1	17	9999	NA	N	N	N	N	02/07/2014	N	NA	NA	NA	NA
11.1.18	650437	656315	11	1	18	9999	NA	N	N	N	N	02/07/2014	N	NA	NA	NA	NA
11.1.19	650428	656317	11	1	19	9999	NA	N	N	N	N	02/07/2014	N	NA	NA	NA	NA
11.1.2	650572	656284	11	1	2	9999	NA	N	N	N	N	02/07/2014	N	NA	NA	NA	NA
11.1.20	650420	656319	11	1	20	9999	NA	N	N	N	N	02/07/2014	N	NA	NA	NA	NA
11.1.21	650411	656321	11	1	21	9999	NA	N	N	N	N	02/07/2014	N	NA	NA	NA	NA
11.1.22	650403	656322	11	1	22	9999	NA	N	N	N	N	02/07/2014	N	NA	NA	NA	NA
11.1.23	650394	656324	11	1	23	F	28.9	N	N	N	N	02/07/2014	N	NA	NA	NA	NA
11.1.24	650386	656326	11	1	24	9999	NA	N	N	N	N	02/07/2014	N	NA	NA	NA	NA
11.1.25	650377	656328	11	1	25	9999	NA	N	N	N	N	02/07/2014	N	NA	NA	NA	NA
11.1.26	650369	656330	11	1	26	9999	NA	N	N	N	N	02/07/2014	N	NA	NA	NA	NA
11.1.27	650360	656332	11	1	27	9999	NA	N	N	N	N	02/07/2014	N	NA	NA	NA	NA
11.1.28	650352	656334	11	1	28	9999	NA	N	N	N	N	02/07/2014	N	NA	NA	NA	NA
11.1.29	650343	656336	11	1	29	9999	NA	N	N	N	N	02/07/2014	N	NA	NA	NA	NA
11.1.3	650564	656286	11	1	3	9999	NA	N	N	N	N	02/07/2014	N	NA	NA	NA	NA
11.1.30	650335	656338	11	1	30	9999	NA	N	N	N	N	02/07/2014	N	NA	NA	NA	NA
11.1.31	650326	656340	11	1	31	9999	NA	N	N	N	N	02/07/2014	N	NA	NA	NA	NA
11.1.32	650318	656338	11	1	32	9999	NA	N	N	N	N	02/07/2014	N	NA	NA	NA	NA
11.1.33	650310	656334	11	1	33	9999	NA	N	N	N	N	02/07/2014	N	NA	NA	NA	NA
11.1.34	650301	656329	11	1	34	9999	NA	N	N	N	N	02/07/2014	N	NA	NA	NA	NA
11.1.35	650293	656325	11	1	35	F	41.9	N	N	N	N	02/07/2014	N	NA	NA	NA	NA
11.1.36	650285	656321	11	1	36	F	38	N	N	N	N	02/07/2014	N	NA	NA	NA	NA
11.1.37	650277	656317	11	1	37	F	43.1	N	N	N	N	02/07/2014	N	NA	NA	NA	NA
11.1.38	650268	656313	11	1	38	9999	NA	N	N	N	N	02/07/2014	N	NA	NA	NA	NA
11.1.39	650260	656309	11	1	39	9999	NA	N	N	N	N	02/07/2014	N	NA	NA	NA	NA
11.1.4	650555	656288	11	1	4	9999	NA	N	N	N	N	02/07/2014	N	NA	NA	NA	NA
11.1.40	650252	656305	11	1	40	9999	NA	N	N	N	N	02/07/2014	N	NA	NA	NA	NA
11.1.41	650243	656300	11	1	41	9999	NA	N	N	N	N	02/07/2014	N	NA	NA	NA	NA
11.1.42	650235	656296	11	1	42	9999	NA	N	N	N	N	02/07/2014	N	NA	NA	NA	NA
11.1.43	650227	656292	11	1	43	9999	NA	N	N	N	N	02/07/2014	N	NA	NA	NA	NA
11.1.44	650219	656288	11	1	44	9999	NA	N	N	N	N	02/07/2014	N	NA	NA	NA	NA
11.1.45	650210	656284	11	1	45	F	40	N	N	N	N	02/07/2014	N	NA	NA	NA	NA
11.1.46	650202	656280	11	1	46	9999	NA	N	N	N	N	02/07/2014	N	NA	NA	NA	NA
11.1.47	650194	656275	11	1	47	9999	NA	N	N	N	N	02/07/2014	N	NA	NA	NA	NA
11.1.48	650185	656271	11	1	48	9999	NA	N	N	N	N	02/07/2014	N	NA	NA	NA	NA
11.1.5	650547	656290	11	1	5	9999	NA	N	N	N	N	02/07/2014	N	NA	NA	NA	NA
11.1.6	650538	656292	11	1	6	9999	NA	N	N	N	N	02/07/2014	N	NA	NA	NA	NA
11.1.7	650530	656294	11	1	7	9999	NA	N	N	N	N	02/07/2014	N	NA	NA	NA	NA
11.1.8	650521	656296	11	1	8	9999	NA	N	N	N	N	02/07/2014	N	NA	NA	NA	NA
11.1.9	650513	656297	11	1	9	9999	NA	N	N	N	N	02/07/2014	N	NA	NA	NA	NA
11.2.1	650654	656230	11	2	1	9999	NA	N	N	N	N	02/07/2014	N	NA	NA	NA	NA
11.2.10	650571	656250	11	2	10	9999	NA	N	N	N	N	02/07/2014	N	NA	NA	NA	NA
11.2.11	650562	656252	11	2	11	9999	NA	N	N	N	N	02/07/2014	N	NA	NA	NA	NA
11.2.12	650553	656254	11	2	12	9999	NA	N	N	N	N	02/07/2014	N	NA	NA	NA	NA
11.2.13	650544	656256	11	2	13	9999	NA	N	N	N	N	02/07/2014	N	NA	NA	NA	NA
11.2.14	650535	656258	11	2	14	9999	NA	N	N	N	N	02/07/2014	N	NA	NA	NA	NA
11.2.15	650526	656260	11	2	15	9999	NA	N	N	N	N	02/07/2014	N	NA	NA	NA	NA
11.2.16	650516	656262	11	2	16	9999	NA	N	N	N	N	02/07/2014	N	NA	NA	NA	NA
11.2.17	650507	656265	11	2	17	9999	NA	N	N	N	N	02/07/2014	N	NA	NA	NA	NA
11.2.18	650498	656267	11	2	18	9999	NA	N	N	N	N	02/07/2014	N	NA	NA	NA	NA
11.2.19	650489	656269	11	2	19	9999	NA	N	N	N	N	02/07/2014	N	NA	NA	NA	NA
11.2.2	650645	656232	11	2	2	9999	NA	N	N	N	N	02/07/2014	N	NA	NA	NA	NA
11.2.20	650480	656271	11	2	20	9999	NA	N	N	N	N	02/07/2014	N	NA	NA	NA	NA
11.2.21	650471	656273	11	2	21	9999	NA	N	N	N	N	02/07/2014	N	NA	NA	NA	NA
11.2.22	650462	656275	11	2	22	F	44.9	N	N	N	N	02/07/2014	N	NA	NA	NA	NA
11.2.23	650452	656277	11	2	23	9999	NA	N	N	N	N	02/07/2014	N	NA	NA	NA	NA
11.2.24	650443	656280	11	2	24	9999	NA	N	N	N	N	02/07/2014	N	NA	NA	NA	NA
11.2.25	650434	656282	11	2	25	9999	NA	N	N	N	N	02/07/2014	N	NA	NA	NA	NA
11.2.26	650425	656284	11	2	26	9999	NA	N	N	N	N	02/07/2014	N	NA	NA	NA	NA
11.2.27	650416	656286	11	2	27	9999	NA	N	N	N	N	02/07/2014	N	NA	NA	NA	NA
11.2.28	650407	656288	11	2	28	9999	NA	N	N	N	N	02/07/2014	N	NA	NA	NA	NA
11.2.29	650397	656290	11	2	29	9999	NA	N	N	N	N	02/07/2014	N	NA	NA	NA	NA
11.2.3	650635	656235	11	2	3	9999	NA	N	N	N	N	02/07/2014	N	NA	NA	NA	NA
11.2.30	650388	656292	11	2	30	9999	NA	N	N	N	N	02/07/2014	N	NA	NA	NA	NA
11.2.31	650379	656295	11	2	31	9999	NA	N	N	N	N	02/07/2014	N	NA	NA	NA	NA
11.2.32	650370	656297	11	2	32	9999	NA	N	N	N	N	02/07/2014	N	NA	NA	NA	NA
11.2.33	650361	656299	11	2	33	9999	NA	N	N	N	N	02/07/2014	N	NA	NA	NA	NA
11.2.34	650352	656301	11	2	34	9999	NA	N	N	N	N	02/07/2014	N	NA	NA	NA	NA
11.2.35	650343	656303	11	2	35	9999	NA	N	N	N	N	02/07/2014	N	NA	NA	NA	NA
11.2.36	650334	656303	11	2	36	F	43.2	N	N	N	N	02/07/2014	N	NA	NA	NA	NA
11.2.37	650325	656296	11	2	37	9999	NA	N	N	N	N	02/07/2014	N	NA	NA	NA	NA
11.2.38	650316	656290	11	2	38	9999	NA	N	N	N	N	02/07/2014	N	NA	NA	NA	NA
11.2.39	650308	656284	11	2	39	F	49.2	N	N	N	N	02/07/2014	N	NA	NA	NA	NA
11.2.4	650626	656237	11	2	4	9999	NA	N	N	N	N	02/07/2014	N	NA	NA	NA	NA
11.2.40	650299	656277	11	2	40	M	37	N	N	N	N	02/07/2014	Y	378	30.1	6.9	78
11.2.40	650299	656277	11	2	40	9999	NA	N	N	N	N	02/07/2014	N	NA	NA	NA	NA
11.2.41	650291	656271	11	2	41	F	36.8	N	N	N	N	02/07/2014	N	NA	NA	NA	NA
11.2.42	650282	656265	11	2	42	F	37.9	N	Y	N	N	02/07/2014	N	NA	NA	NA	NA
11.2.43	650273	656258	11	2	43	F	40	N	N	N	N	02/07/2014	N	NA	NA	NA	NA
11.2.44	650265	656252	11	2	44	9999	NA	N	N	N	N	02/07/2014	N	NA	NA	NA	NA
11.2.45	650256	656246	11	2	45	9999	NA	N	N	N	N	02/07/2014	N	NA	NA	NA	NA
11.2.46	650248	656239	11	2	46	F	46.2	N	Y	N	N	02/07/2014	N	NA	NA	NA	NA
11.2.47	650239	656233	11	2	47	9999	NA	N	N	N	N	02/07/2014	N	NA	NA	NA	NA
11.2.48	650230	656227	11	2	48	9999	NA	N	N	N	N	02/07/2014	N	NA	NA	NA	NA
11.2.5	650617	656239	11	2	5	9999	NA	N	N	N	N	02/07/2014	N	NA	NA	NA	NA
11.2.6	650608	656241	11	2	6	9999	NA	N	N	N	N	02/07/2014	N	NA	NA	NA	NA
11.2.7	650599	656243	11	2	7	9999	NA	N	N	N	N	02/07/2014	N	NA	NA	NA	NA
11.2.8	650590	656245	11	2	8	9999	NA	N	N	N	N	02/07/2014	N	NA	NA	NA	NA
11.2.9	650581	656247	11	2	9	9999	NA	N	N	N	N	02/07/2014	N	NA	NA	NA	NA
11.3.1	650343	656293	11	3	1	M	39.6	N	N	N	N	02/07/2014	Y	392	31.8	7.8	122
11.3.1	650343	656293	11	3	1	9999	NA	N	N	N	N	02/07/2014	N	NA	NA	NA	NA
11.3.10	650442	656254	11	3	10	F	29.5	N	N	N	N	02/07/2014	N	NA	NA	NA	NA
11.3.10	650442	656254	11	3	10	F	38.2	N	N	N	N	02/07/2014	N	NA	NA	NA	NA
11.3.10	650442	656254	11	3	10	F	40.9	N	N	N	N	02/07/2014	N	NA	NA	NA	NA
11.3.10	650442	656254	11	3	10	M	33.4	N	N	N	N	02/07/2014	N	NA	NA	NA	NA
11.3.11	650453	656249	11	3	11	F	34.2	N	N	N	N	02/07/2014	N	NA	NA	NA	NA
11.3.12	650464	656245	11	3	12	9999	NA	N	N	N	N	02/07/2014	N	NA	NA	NA	NA
11.3.13	650475	656240	11	3	13	9999	NA	N	N	N	N	02/07/2014	N	NA	NA	NA	NA
11.3.14	650486	656236	11	3	14	F	39.5	N	N	N	N	02/07/2014	N	NA	NA	NA	NA
11.3.14	650486	656236	11	3	14	F	44	N	N	N	N	02/07/2014	N	NA	NA	NA	NA
11.3.15	650497	656232	11	3	15	F	35.5	N	N	N	N	02/07/2014	N	NA	NA	NA	NA
11.3.15	650497	656232	11	3	15	F	38	N	N	N	N	02/07/2014	N	NA	NA	NA	NA
11.3.15	650497	656232	11	3	15	F	40.7	N	N	N	N	02/07/2014	N	NA	NA	NA	NA
11.3.15	650497	656232	11	3	15	M	49.3	N	N	N	N	02/07/2014	N	NA	NA	NA	NA
11.3.16	650508	656227	11	3	16	F	20.3	N	N	N	N	02/07/2014	N	NA	NA	NA	NA
11.3.16	650508	656227	11	3	16	F	33.4	N	N	N	N	02/07/2014	N	NA	NA	NA	NA
11.3.16	650508	656227	11	3	16	F	41.4	N	N	N	N	02/07/2014	N	NA	NA	NA	NA
11.3.16	650508	656227	11	3	16	M	35.7	N	Y	N	N	02/07/2014	N	NA	NA	NA	NA
11.3.16	650508	656227	11	3	16	M	36.6	N	N	N	N	02/07/2014	N	NA	NA	NA	NA
11.3.16	650508	656227	11	3	16	M	37.9	N	N	N	N	02/07/2014	N	NA	NA	NA	NA
11.3.17	650519	656223	11	3	17	F	33.6	N	N	N	N	02/07/2014	Y	378	32.5	1.1	278
11.3.17	650519	656223	11	3	17	F	37.4	N	N	N	N	02/07/2014	N	NA	NA	NA	NA
11.3.17	650519	656223	11	3	17	M	32	N	N	N	N	02/07/2014	N	NA	NA	NA	NA
11.3.17	650519	656223	11	3	17	M	33.5	N	N	N	N	02/07/2014	N	NA	NA	NA	NA
11.3.18	650530	656218	11	3	18	F	32.3	N	N	N	N	02/07/2014	N	NA	NA	NA	NA
11.3.18	650530	656218	11	3	18	F	35.2	N	N	N	N	02/07/2014	N	NA	NA	NA	NA
11.3.18	650530	656218	11	3	18	F	36.9	N	N	N	N	02/07/2014	N	NA	NA	NA	NA
11.3.18	650530	656218	11	3	18	F	37.2	N	N	N	N	02/07/2014	N	NA	NA	NA	NA
11.3.18	650530	656218	11	3	18	M	40.7	N	Y	N	N	02/07/2014	N	NA	NA	NA	NA
11.3.19	650541	656214	11	3	19	F	35	N	Y	N	N	02/07/2014	N	NA	NA	NA	NA
11.3.19	650541	656214	11	3	19	F	35.6	N	N	N	N	02/07/2014	N	NA	NA	NA	NA
11.3.2	650354	656289	11	3	2	F	41.9	N	N	N	N	02/07/2014	N	NA	NA	NA	NA
11.3.2	650354	656289	11	3	2	F	42.2	N	N	N	N	02/07/2014	N	NA	NA	NA	NA
11.3.20	650552	656209	11	3	20	F	27.2	N	N	N	N	02/07/2014	N	NA	NA	NA	NA
11.3.20	650552	656209	11	3	20	F	30.3	N	Y	N	N	02/07/2014	N	NA	NA	NA	NA
11.3.20	650552	656209	11	3	20	F	33.3	N	Y	N	N	02/07/2014	N	NA	NA	NA	NA
11.3.20	650552	656209	11	3	20	F	33.8	N	Y	N	N	02/07/2014	N	NA	NA	NA	NA
11.3.20	650552	656209	11	3	20	F	34	N	N	N	N	02/07/2014	N	NA	NA	NA	NA
11.3.21	650563	656205	11	3	21	F	35	N	N	N	N	02/07/2014	N	NA	NA	NA	NA
11.3.22	650574	656201	11	3	22	9999	NA	N	N	N	N	02/07/2014	N	NA	NA	NA	NA
11.3.23	650585	656196	11	3	23	F	35.4	N	N	N	N	02/07/2014	N	NA	NA	NA	NA
11.3.23	650585	656196	11	3	23	F	38	N	N	N	N	02/07/2014	N	NA	NA	NA	NA
11.3.23	650585	656196	11	3	23	F	39.2	N	N	N	N	02/07/2014	N	NA	NA	NA	NA
11.3.24	650590	656179	11	3	24	9999	NA	N	N	N	N	02/07/2014	N	NA	NA	NA	NA
11.3.25	650586	656172	11	3	25	9999	NA	N	N	N	N	02/07/2014	N	NA	NA	NA	NA
11.3.26	650574	656171	11	3	26	9999	NA	N	N	N	N	02/07/2014	N	NA	NA	NA	NA
11.3.27	650563	656174	11	3	27	9999	NA	N	N	N	N	02/07/2014	N	NA	NA	NA	NA
11.3.28	650552	656178	11	3	28	9999	NA	N	N	N	N	02/07/2014	N	NA	NA	NA	NA
11.3.29	650541	656183	11	3	29	F	33.8	N	N	N	N	02/07/2014	N	NA	NA	NA	NA
11.3.29	650541	656183	11	3	29	F	42.7	N	Y	N	N	02/07/2014	N	NA	NA	NA	NA
11.3.29	650541	656183	11	3	29	M	30.4	N	N	N	N	02/07/2014	N	NA	NA	NA	NA
11.3.3	650365	656284	11	3	3	9999	NA	N	N	N	N	02/07/2014	N	NA	NA	NA	NA
11.3.30	650530	656187	11	3	30	F	35.5	N	N	N	N	02/07/2014	N	NA	NA	NA	NA
11.3.30	650530	656187	11	3	30	M	31.9	N	N	N	N	02/07/2014	N	NA	NA	NA	NA
11.3.31	650519	656191	11	3	31	9999	NA	N	N	N	N	02/07/2014	N	NA	NA	NA	NA
11.3.32	650508	656196	11	3	32	F	28.6	N	N	N	N	02/07/2014	N	NA	NA	NA	NA
11.3.32	650508	656196	11	3	32	F	38.7	N	N	N	N	02/07/2014	N	NA	NA	NA	NA
11.3.33	650497	656200	11	3	33	F	37.2	N	N	N	N	02/07/2014	N	NA	NA	NA	NA
11.3.34	650486	656204	11	3	34	9999	NA	N	N	N	N	02/07/2014	N	NA	NA	NA	NA
11.3.35	650475	656209	11	3	35	9999	NA	N	N	N	N	02/07/2014	N	NA	NA	NA	NA
11.3.36	650464	656213	11	3	36	F	31.6	N	N	N	N	02/07/2014	N	NA	NA	NA	NA
11.3.36	650464	656213	11	3	36	F	39.4	N	N	N	N	02/07/2014	N	NA	NA	NA	NA
11.3.36	650464	656213	11	3	36	M	37.7	N	N	N	N	02/07/2014	N	NA	NA	NA	NA
11.3.37	650453	656218	11	3	37	F	29.8	N	N	N	N	02/07/2014	N	NA	NA	NA	NA
11.3.37	650453	656218	11	3	37	F	33.5	N	N	N	N	02/07/2014	N	NA	NA	NA	NA
11.3.38	650442	656222	11	3	38	F	36	N	N	N	N	02/07/2014	N	NA	NA	NA	NA
11.3.38	650442	656222	11	3	38	M	37.2	N	N	N	N	02/07/2014	N	NA	NA	NA	NA
11.3.39	650431	656226	11	3	39	F	31.7	N	N	N	N	02/07/2014	N	NA	NA	NA	NA
11.3.39	650431	656226	11	3	39	F	36.8	N	N	N	N	02/07/2014	N	NA	NA	NA	NA
11.3.39	650431	656226	11	3	39	F	40.4	N	N	N	N	02/07/2014	N	NA	NA	NA	NA
11.3.4	650376	656280	11	3	4	9999	NA	N	N	N	N	02/07/2014	N	NA	NA	NA	NA
11.3.40	650420	656231	11	3	40	F	41.6	N	Y	N	N	02/07/2014	N	NA	NA	NA	NA
11.3.40	650420	656231	11	3	40	M	28.2	N	N	N	N	02/07/2014	N	NA	NA	NA	NA
11.3.40	650420	656231	11	3	40	M	34.3	N	N	N	N	02/07/2014	N	NA	NA	NA	NA
11.3.41	650409	656235	11	3	41	F	34.7	N	N	N	N	02/07/2014	N	NA	NA	NA	NA
11.3.41	650409	656235	11	3	41	F	35.8	N	N	N	N	02/07/2014	N	NA	NA	NA	NA
11.3.41	650409	656235	11	3	41	F	38.2	N	N	N	N	02/07/2014	N	NA	NA	NA	NA
11.3.41	650409	656235	11	3	41	F	44.4	N	N	N	N	02/07/2014	N	NA	NA	NA	NA
11.3.42	650398	656239	11	3	42	F	32.2	N	N	N	N	02/07/2014	N	NA	NA	NA	NA
11.3.42	650398	656239	11	3	42	F	34.5	N	N	N	N	02/07/2014	N	NA	NA	NA	NA
11.3.42	650398	656239	11	3	42	F	36.2	N	N	N	N	02/07/2014	Y	349	34.9	1.3	157
11.3.42	650398	656239	11	3	42	F	37.2	N	N	N	N	02/07/2014	N	NA	NA	NA	NA
11.3.42	650398	656239	11	3	42	M	38.6	N	N	N	N	02/07/2014	N	NA	NA	NA	NA
11.3.43	650387	656244	11	3	43	F	35.4	N	N	N	N	02/07/2014	N	NA	NA	NA	NA
11.3.44	650376	656248	11	3	44	9999	NA	N	N	N	N	02/07/2014	N	NA	NA	NA	NA
11.3.45	650365	656253	11	3	45	9999	NA	N	N	N	N	02/07/2014	N	NA	NA	NA	NA
11.3.46	650353	656257	11	3	46	9999	NA	N	N	N	N	02/07/2014	N	NA	NA	NA	NA
11.3.47	650342	656261	11	3	47	9999	NA	N	N	N	N	02/07/2014	N	NA	NA	NA	NA
11.3.48	650331	656266	11	3	48	9999	NA	N	N	N	N	02/07/2014	N	NA	NA	NA	NA
11.3.48	650331	656266	11	3	48	M	41.7	N	N	N	N	02/07/2014	Y	392	35	6.7	99
11.3.5	650387	656276	11	3	5	9999	NA	N	N	N	N	02/07/2014	N	NA	NA	NA	NA
11.3.6	650398	656271	11	3	6	9999	NA	N	N	N	N	02/07/2014	N	NA	NA	NA	NA
11.3.7	650409	656267	11	3	7	9999	NA	N	N	N	N	02/07/2014	N	NA	NA	NA	NA
11.3.8	650420	656262	11	3	8	F	39.9	N	N	N	N	02/07/2014	N	NA	NA	NA	NA
11.3.8	650420	656262	11	3	8	M	36.2	N	N	N	N	02/07/2014	N	NA	NA	NA	NA
11.3.9	650431	656258	11	3	9	F	34.3	N	N	N	N	02/07/2014	N	NA	NA	NA	NA
11.4.1	650313	656242	11	4	1	F	27.3	N	N	N	N	02/07/2014	N	NA	NA	NA	NA
11.4.1	650313	656242	11	4	1	F	33.8	N	N	N	N	02/07/2014	N	NA	NA	NA	NA
11.4.1	650313	656242	11	4	1	F	34.9	N	N	N	N	02/07/2014	N	NA	NA	NA	NA
11.4.1	650313	656242	11	4	1	F	35	N	N	N	N	02/07/2014	N	NA	NA	NA	NA
11.4.1	650313	656242	11	4	1	F	35.6	N	N	N	N	02/07/2014	N	NA	NA	NA	NA
11.4.1	650313	656242	11	4	1	F	37.2	N	Y	N	N	02/07/2014	N	NA	NA	NA	NA
11.4.1	650313	656242	11	4	1	F	42.6	N	N	N	N	02/07/2014	N	NA	NA	NA	NA
11.4.1	650313	656242	11	4	1	M	29.6	N	N	N	N	02/07/2014	N	NA	NA	NA	NA
11.4.1	650313	656242	11	4	1	M	33.1	N	N	N	N	02/07/2014	N	NA	NA	NA	NA
11.4.10	650415	656202	11	4	10	F	31	N	Y	N	N	02/07/2014	N	NA	NA	NA	NA
11.4.10	650415	656202	11	4	10	F	32.8	N	N	N	N	02/07/2014	N	NA	NA	NA	NA
11.4.10	650415	656202	11	4	10	F	33.9	N	N	N	N	02/07/2014	N	NA	NA	NA	NA
11.4.11	650426	656198	11	4	11	9999	NA	N	N	N	N	02/07/2014	N	NA	NA	NA	NA
11.4.12	650437	656193	11	4	12	9999	NA	N	N	N	N	02/07/2014	N	NA	NA	NA	NA
11.4.13	650449	656189	11	4	13	F	37.1	N	N	N	N	02/07/2014	Y	392	35.3	1.8	211
11.4.13	650449	656189	11	4	13	M	30.2	N	N	N	N	02/07/2014	N	NA	NA	NA	NA
11.4.14	650460	656184	11	4	14	F	21.2	N	N	N	N	02/07/2014	N	NA	NA	NA	NA
11.4.15	650471	656180	11	4	15	F	25.3	N	N	N	N	02/07/2014	N	NA	NA	NA	NA
11.4.15	650471	656180	11	4	15	F	32.8	N	N	N	N	02/07/2014	N	NA	NA	NA	NA
11.4.15	650471	656180	11	4	15	F	35.9	N	N	N	N	02/07/2014	Y	349	35	0.9	235
11.4.15	650471	656180	11	4	15	F	43.5	N	N	N	N	02/07/2014	N	NA	NA	NA	NA
11.4.16	650483	656175	11	4	16	9999	NA	N	N	N	N	02/07/2014	N	NA	NA	NA	NA
11.4.17	650494	656171	11	4	17	F	33.7	N	N	N	N	02/07/2014	N	NA	NA	NA	NA
11.4.17	650494	656171	11	4	17	F	37	N	N	N	N	02/07/2014	N	NA	NA	NA	NA
11.4.18	650505	656167	11	4	18	F	29.1	N	N	N	N	02/07/2014	N	NA	NA	NA	NA
11.4.18	650505	656167	11	4	18	F	37.3	N	N	N	N	02/07/2014	N	NA	NA	NA	NA
11.4.19	650516	656162	11	4	19	9999	NA	N	N	N	N	02/07/2014	N	NA	NA	NA	NA
11.4.2	650324	656237	11	4	2	F	27.7	N	N	N	N	02/07/2014	N	NA	NA	NA	NA
11.4.2	650324	656237	11	4	2	F	36	N	N	N	N	02/07/2014	N	NA	NA	NA	NA
11.4.2	650324	656237	11	4	2	F	36.7	N	N	N	N	02/07/2014	N	NA	NA	NA	NA
11.4.2	650324	656237	11	4	2	F	42.9	N	N	N	N	02/07/2014	N	NA	NA	NA	NA
11.4.2	650324	656237	11	4	2	M	33.4	N	N	N	N	02/07/2014	N	NA	NA	NA	NA
11.4.2	650324	656237	11	4	2	M	37.7	N	N	N	N	02/07/2014	N	NA	NA	NA	NA
11.4.2	650324	656237	11	4	2	M	45.4	N	N	N	N	02/07/2014	N	NA	NA	NA	NA
11.4.20	650528	656158	11	4	20	F	35.1	N	N	N	N	02/07/2014	N	NA	NA	NA	NA
11.4.20	650528	656158	11	4	20	F	35.6	N	N	N	N	02/07/2014	N	NA	NA	NA	NA
11.4.20	650528	656158	11	4	20	M	27.6	N	N	N	N	02/07/2014	N	NA	NA	NA	NA
11.4.21	650539	656153	11	4	21	9999	NA	N	N	N	N	02/07/2014	N	NA	NA	NA	NA
11.4.22	650550	656149	11	4	22	F	33.9	N	N	N	N	02/07/2014	N	NA	NA	NA	NA
11.4.22	650550	656149	11	4	22	F	35.7	N	N	N	N	02/07/2014	N	NA	NA	NA	NA
11.4.22	650550	656149	11	4	22	M	39	N	N	N	N	02/07/2014	N	NA	NA	NA	NA
11.4.23	650562	656145	11	4	23	9999	NA	N	N	N	N	02/07/2014	N	NA	NA	NA	NA
11.4.24	650573	656140	11	4	24	F	32.2	N	N	N	N	02/07/2014	N	NA	NA	NA	NA
11.4.25	650574	656124	11	4	25	F	34.4	N	N	N	N	02/07/2014	N	NA	NA	NA	NA
11.4.26	650563	656119	11	4	26	F	34.2	N	N	N	N	02/07/2014	N	NA	NA	NA	NA
11.4.26	650563	656119	11	4	26	M	31.6	N	N	N	N	02/07/2014	N	NA	NA	NA	NA
11.4.26	650563	656119	11	4	26	M	39.5	N	N	N	N	02/07/2014	N	NA	NA	NA	NA
11.4.27	650552	656115	11	4	27	M	36.7	N	N	N	N	02/07/2014	N	NA	NA	NA	NA
11.4.28	650540	656117	11	4	28	9999	NA	N	N	N	N	02/07/2014	N	NA	NA	NA	NA
11.4.29	650529	656121	11	4	29	F	29.5	N	N	N	N	02/07/2014	N	NA	NA	NA	NA
11.4.29	650529	656121	11	4	29	F	31.8	N	N	N	N	02/07/2014	N	NA	NA	NA	NA
11.4.29	650529	656121	11	4	29	F	33.9	N	Y	N	N	02/07/2014	N	NA	NA	NA	NA
11.4.3	650336	656233	11	4	3	F	30.6	N	N	N	N	02/07/2014	Y	378	29.8	0.8	95
11.4.3	650336	656233	11	4	3	M	30	N	N	N	N	02/07/2014	N	NA	NA	NA	NA
11.4.3	650336	656233	11	4	3	M	37.5	N	N	N	N	02/07/2014	N	NA	NA	NA	NA
11.4.30	650518	656126	11	4	30	9999	NA	N	N	N	N	02/07/2014	N	NA	NA	NA	NA
11.4.31	650506	656130	11	4	31	9999	NA	N	N	N	N	02/07/2014	N	NA	NA	NA	NA
11.4.32	650495	656134	11	4	32	F	36.2	N	N	N	N	02/07/2014	N	NA	NA	NA	NA
11.4.33	650484	656139	11	4	33	F	32	N	N	N	N	02/07/2014	N	NA	NA	NA	NA
11.4.33	650484	656139	11	4	33	F	36.8	N	N	N	N	02/07/2014	N	NA	NA	NA	NA
11.4.34	650472	656143	11	4	34	F	33	N	N	N	N	02/07/2014	N	NA	NA	NA	NA
11.4.34	650472	656143	11	4	34	F	38.5	N	N	N	N	02/07/2014	N	NA	NA	NA	NA
11.4.34	650472	656143	11	4	34	F	40	N	Y	N	N	02/07/2014	N	NA	NA	NA	NA
11.4.35	650461	656148	11	4	35	9999	NA	N	N	N	N	02/07/2014	N	NA	NA	NA	NA
11.4.36	650450	656152	11	4	36	F	31	N	N	N	N	02/07/2014	N	NA	NA	NA	NA
11.4.36	650450	656152	11	4	36	F	35.1	N	N	N	N	02/07/2014	N	NA	NA	NA	NA
11.4.37	650438	656156	11	4	37	M	58.2	N	N	N	N	02/07/2014	N	NA	NA	NA	NA
11.4.38	650427	656161	11	4	38	M	33.4	N	N	N	N	02/07/2014	N	NA	NA	NA	NA
11.4.39	650416	656165	11	4	39	9999	NA	N	N	N	N	02/07/2014	N	NA	NA	NA	NA
11.4.4	650347	656228	11	4	4	F	30.5	N	N	N	N	02/07/2014	N	NA	NA	NA	NA
11.4.4	650347	656228	11	4	4	F	41.8	N	N	N	N	02/07/2014	N	NA	NA	NA	NA
11.4.4	650347	656228	11	4	4	M	35.5	N	N	N	N	02/07/2014	N	NA	NA	NA	NA
11.4.40	650405	656170	11	4	40	9999	NA	N	N	N	N	02/07/2014	N	NA	NA	NA	NA
11.4.41	650393	656174	11	4	41	9999	NA	N	N	N	N	02/07/2014	N	NA	NA	NA	NA
11.4.42	650382	656178	11	4	42	9999	NA	N	N	N	N	02/07/2014	N	NA	NA	NA	NA
11.4.43	650371	656183	11	4	43	F	36.3	N	N	N	N	02/07/2014	N	NA	NA	NA	NA
11.4.43	650371	656183	11	4	43	F	37.6	N	N	N	N	02/07/2014	Y	349	36.5	1.1	137
11.4.44	650359	656187	11	4	44	F	35.4	N	N	N	N	02/07/2014	N	NA	NA	NA	NA
11.4.44	650359	656187	11	4	44	F	37.1	N	N	N	N	02/07/2014	N	NA	NA	NA	NA
11.4.44	650359	656187	11	4	44	F	37.4	N	N	N	N	02/07/2014	N	NA	NA	NA	NA
11.4.45	650348	656192	11	4	45	9999	NA	N	N	N	N	02/07/2014	N	NA	NA	NA	NA
11.4.46	650337	656196	11	4	46	9999	NA	N	N	N	N	02/07/2014	N	NA	NA	NA	NA
11.4.47	650326	656200	11	4	47	F	39.7	N	N	N	N	02/07/2014	N	NA	NA	NA	NA
11.4.47	650326	656200	11	4	47	M	50.8	N	Y	N	N	02/07/2014	N	NA	NA	NA	NA
11.4.48	650314	656205	11	4	48	F	41.8	N	N	N	N	02/07/2014	N	NA	NA	NA	NA
11.4.5	650358	656224	11	4	5	F	28.6	N	N	N	N	02/07/2014	N	NA	NA	NA	NA
11.4.5	650358	656224	11	4	5	F	31.4	N	N	N	N	02/07/2014	N	NA	NA	NA	NA
11.4.5	650358	656224	11	4	5	F	35	N	N	N	N	02/07/2014	N	NA	NA	NA	NA
11.4.5	650358	656224	11	4	5	F	45.1	N	N	N	N	02/07/2014	N	NA	NA	NA	NA
11.4.5	650358	656224	11	4	5	M	29.7	N	N	N	N	02/07/2014	N	NA	NA	NA	NA
11.4.6	650370	656220	11	4	6	M	29.6	N	N	N	N	02/07/2014	N	NA	NA	NA	NA
11.4.7	650381	656215	11	4	7	F	38	N	N	N	N	02/07/2014	N	NA	NA	NA	NA
11.4.7	650381	656215	11	4	7	M	32.5	N	N	N	N	02/07/2014	N	NA	NA	NA	NA
11.4.8	650392	656211	11	4	8	F	31.7	N	N	N	N	02/07/2014	N	NA	NA	NA	NA
11.4.8	650392	656211	11	4	8	M	50.4	N	Y	N	N	02/07/2014	N	NA	NA	NA	NA
11.4.9	650403	656206	11	4	9	F	39.4	N	Y	N	N	02/07/2014	N	NA	NA	NA	NA
11.5.1	650305	656177	11	5	1	F	36.4	N	N	N	N	02/07/2014	N	NA	NA	NA	NA
11.5.1	650305	656177	11	5	1	F	37.8	N	N	N	N	02/07/2014	N	NA	NA	NA	NA
11.5.1	650305	656177	11	5	1	F	39.5	N	N	N	N	02/07/2014	N	NA	NA	NA	NA
11.5.1	650305	656177	11	5	1	M	33.4	N	N	N	N	02/07/2014	N	NA	NA	NA	NA
11.5.10	650403	656142	11	5	10	F	34.2	N	N	N	N	02/07/2014	N	NA	NA	NA	NA
11.5.10	650403	656142	11	5	10	F	37.1	N	Y	N	N	02/07/2014	N	NA	NA	NA	NA
11.5.10	650403	656142	11	5	10	M	36.9	N	N	N	N	02/07/2014	N	NA	NA	NA	NA
11.5.11	650413	656138	11	5	11	9999	NA	N	N	N	N	02/07/2014	N	NA	NA	NA	NA
11.5.12	650424	656134	11	5	12	F	41.5	N	N	N	N	02/07/2014	N	NA	NA	NA	NA
11.5.13	650435	656130	11	5	13	F	36.4	N	N	N	N	02/07/2014	Y	349	34.9	1.5	216
11.5.13	650435	656130	11	5	13	F	41.2	N	N	N	N	02/07/2014	N	NA	NA	NA	NA
11.5.13	650435	656130	11	5	13	F	43.3	N	N	N	N	02/07/2014	N	NA	NA	NA	NA
11.5.14	650446	656126	11	5	14	M	34.6	N	N	N	N	02/07/2014	N	NA	NA	NA	NA
11.5.15	650457	656122	11	5	15	9999	NA	N	N	N	N	02/07/2014	N	NA	NA	NA	NA
11.5.16	650468	656118	11	5	16	9999	NA	N	N	N	N	02/07/2014	N	NA	NA	NA	NA
11.5.17	650478	656114	11	5	17	M	33	N	Y	N	N	02/07/2014	N	NA	NA	NA	NA
11.5.18	650489	656110	11	5	18	M	32.8	N	N	N	N	02/07/2014	N	NA	NA	NA	NA
11.5.19	650500	656106	11	5	19	F	33	N	N	N	N	02/07/2014	N	NA	NA	NA	NA
11.5.19	650500	656106	11	5	19	F	34.8	N	N	N	N	02/07/2014	N	NA	NA	NA	NA
11.5.2	650316	656173	11	5	2	F	30.6	N	N	N	N	02/07/2014	N	NA	NA	NA	NA
11.5.2	650316	656173	11	5	2	F	33.2	N	N	N	N	02/07/2014	N	NA	NA	NA	NA
11.5.2	650316	656173	11	5	2	F	34.9	N	N	N	N	02/07/2014	N	NA	NA	NA	NA
11.5.2	650316	656173	11	5	2	F	39.8	N	N	N	N	02/07/2014	N	NA	NA	NA	NA
11.5.2	650316	656173	11	5	2	F	41.5	N	N	N	N	02/07/2014	N	NA	NA	NA	NA
11.5.2	650316	656173	11	5	2	F	41.9	N	N	N	N	02/07/2014	N	NA	NA	NA	NA
11.5.2	650316	656173	11	5	2	F	44	N	N	N	N	02/07/2014	N	NA	NA	NA	NA
11.5.2	650316	656173	11	5	2	M	38.6	N	N	N	N	02/07/2014	N	NA	NA	NA	NA
11.5.2	650316	656173	11	5	2	M	41.2	N	N	N	N	02/07/2014	N	NA	NA	NA	NA
11.5.20	650511	656102	11	5	20	F	26.2	N	N	N	N	02/07/2014	N	NA	NA	NA	NA
11.5.20	650511	656102	11	5	20	F	33.2	N	N	N	N	02/07/2014	N	NA	NA	NA	NA
11.5.20	650511	656102	11	5	20	F	37.3	N	N	N	N	02/07/2014	N	NA	NA	NA	NA
11.5.20	650511	656102	11	5	20	M	31.7	N	N	N	N	02/07/2014	N	NA	NA	NA	NA
11.5.20	650511	656102	11	5	20	M	47.7	N	Y	N	N	02/07/2014	N	NA	NA	NA	NA
11.5.21	650522	656098	11	5	21	F	30	N	N	N	N	02/07/2014	N	NA	NA	NA	NA
11.5.21	650522	656098	11	5	21	F	31.9	N	N	N	N	02/07/2014	N	NA	NA	NA	NA
11.5.22	650533	656094	11	5	22	F	33.2	N	N	N	N	02/07/2014	N	NA	NA	NA	NA
11.5.23	650543	656090	11	5	23	9999	NA	N	N	N	N	02/07/2014	N	NA	NA	NA	NA
11.5.24	650554	656086	11	5	24	F	32	N	Y	N	N	02/07/2014	N	NA	NA	NA	NA
11.5.24	650554	656086	11	5	24	F	38.7	N	N	N	N	02/07/2014	N	NA	NA	NA	NA
11.5.24	650554	656086	11	5	24	F	40	N	N	N	N	02/07/2014	N	NA	NA	NA	NA
11.5.25	650560	656073	11	5	25	F	37.9	N	N	N	N	02/07/2014	N	NA	NA	NA	NA
11.5.25	650560	656073	11	5	25	F	38.5	N	N	N	N	02/07/2014	N	NA	NA	NA	NA
11.5.25	650560	656073	11	5	25	F	43.2	N	N	N	N	02/07/2014	N	NA	NA	NA	NA
11.5.26	650553	656068	11	5	26	F	34.5	N	Y	N	N	02/07/2014	N	NA	NA	NA	NA
11.5.27	650542	656066	11	5	27	F	29.5	N	N	N	N	02/07/2014	N	NA	NA	NA	NA
11.5.27	650542	656066	11	5	27	F	34.6	N	N	N	N	02/07/2014	N	NA	NA	NA	NA
11.5.27	650542	656066	11	5	27	F	38.9	N	N	N	N	02/07/2014	N	NA	NA	NA	NA
11.5.27	650542	656066	11	5	27	F	41	N	N	N	N	02/07/2014	N	NA	NA	NA	NA
11.5.27	650542	656066	11	5	27	F	44	N	N	N	N	02/07/2014	N	NA	NA	NA	NA
11.5.28	650530	656064	11	5	28	F	33.6	N	N	N	N	02/07/2014	N	NA	NA	NA	NA
11.5.28	650530	656064	11	5	28	F	43.3	N	N	N	N	02/07/2014	N	NA	NA	NA	NA
11.5.29	650520	656067	11	5	29	F	35.2	N	N	N	N	02/07/2014	N	NA	NA	NA	NA
11.5.29	650520	656067	11	5	29	M	61.2	N	N	N	N	02/07/2014	N	NA	NA	NA	NA
11.5.3	650327	656169	11	5	3	F	35	N	N	N	N	02/07/2014	N	NA	NA	NA	NA
11.5.3	650327	656169	11	5	3	F	37.7	N	N	N	N	02/07/2014	Y	378	37.5	0.2	102
11.5.30	650509	656071	11	5	30	F	40.5	N	Y	N	N	02/07/2014	N	NA	NA	NA	NA
11.5.31	650498	656075	11	5	31	F	38.2	N	N	N	N	02/07/2014	N	NA	NA	NA	NA
11.5.32	650487	656080	11	5	32	F	32.1	N	N	N	N	02/07/2014	N	NA	NA	NA	NA
11.5.32	650487	656080	11	5	32	M	31	N	N	N	N	02/07/2014	N	NA	NA	NA	NA
11.5.33	650476	656084	11	5	33	F	30.3	N	N	N	N	02/07/2014	N	NA	NA	NA	NA
11.5.34	650465	656088	11	5	34	9999	NA	N	N	N	N	02/07/2014	N	NA	NA	NA	NA
11.5.35	650455	656092	11	5	35	F	30.2	N	N	N	N	02/07/2014	N	NA	NA	NA	NA
11.5.35	650455	656092	11	5	35	F	35	N	N	N	N	02/07/2014	N	NA	NA	NA	NA
11.5.35	650455	656092	11	5	35	F	35.8	N	N	N	N	02/07/2014	N	NA	NA	NA	NA
11.5.35	650455	656092	11	5	35	F	44	N	Y	N	N	02/07/2014	N	NA	NA	NA	NA
11.5.36	650444	656096	11	5	36	F	30.4	N	N	N	N	02/07/2014	N	NA	NA	NA	NA
11.5.36	650444	656096	11	5	36	F	35.5	N	N	N	N	02/07/2014	N	NA	NA	NA	NA
11.5.37	650433	656100	11	5	37	F	30.1	N	N	N	N	02/07/2014	Y	378	29.5	0.6	229
11.5.37	650433	656100	11	5	37	F	34	N	N	N	N	02/07/2014	N	NA	NA	NA	NA
11.5.37	650433	656100	11	5	37	F	36.7	N	N	N	N	02/07/2014	N	NA	NA	NA	NA
11.5.37	650433	656100	11	5	37	M	36.5	N	N	N	N	02/07/2014	Y	392	30.6	5.9	229
11.5.38	650422	656104	11	5	38	F	38.1	N	N	N	N	02/07/2014	N	NA	NA	NA	NA
11.5.39	650411	656109	11	5	39	F	36.7	N	N	N	N	02/07/2014	N	NA	NA	NA	NA
11.5.4	650338	656165	11	5	4	M	30.7	N	N	N	N	02/07/2014	N	NA	NA	NA	NA
11.5.4	650338	656165	11	5	4	M	61.4	N	N	N	N	02/07/2014	N	NA	NA	NA	NA
11.5.40	650401	656113	11	5	40	F	29.8	N	N	N	N	02/07/2014	N	NA	NA	NA	NA
11.5.40	650401	656113	11	5	40	F	31.8	N	N	N	N	02/07/2014	N	NA	NA	NA	NA
11.5.40	650401	656113	11	5	40	F	37.3	N	Y	N	N	02/07/2014	N	NA	NA	NA	NA
11.5.40	650401	656113	11	5	40	F	37.8	N	N	N	N	02/07/2014	Y	349	36.2	1.6	195
11.5.41	650390	656117	11	5	41	F	39.4	N	N	N	N	02/07/2014	N	NA	NA	NA	NA
11.5.41	650390	656117	11	5	41	F	40.4	N	N	N	N	02/07/2014	N	NA	NA	NA	NA
11.5.42	650379	656121	11	5	42	F	32.2	N	N	N	N	02/07/2014	N	NA	NA	NA	NA
11.5.42	650379	656121	11	5	42	F	34	N	N	N	N	02/07/2014	N	NA	NA	NA	NA
11.5.42	650379	656121	11	5	42	F	35	N	N	N	N	02/07/2014	N	NA	NA	NA	NA
11.5.42	650379	656121	11	5	42	F	35.2	N	N	N	N	02/07/2014	N	NA	NA	NA	NA
11.5.42	650379	656121	11	5	42	F	39.3	N	N	N	N	02/07/2014	N	NA	NA	NA	NA
11.5.43	650368	656125	11	5	43	M	42.1	N	N	N	N	02/07/2014	N	NA	NA	NA	NA
11.5.44	650357	656129	11	5	44	9999	NA	N	N	N	N	02/07/2014	N	NA	NA	NA	NA
11.5.45	650347	656133	11	5	45	9999	NA	N	N	N	N	02/07/2014	N	NA	NA	NA	NA
11.5.46	650336	656138	11	5	46	F	36.5	N	N	N	N	02/07/2014	N	NA	NA	NA	NA
11.5.46	650336	656138	11	5	46	F	38.4	N	N	N	N	02/07/2014	N	NA	NA	NA	NA
11.5.46	650336	656138	11	5	46	M	48.1	N	N	N	N	02/07/2014	N	NA	NA	NA	NA
11.5.47	650325	656142	11	5	47	9999	NA	N	N	N	N	02/07/2014	N	NA	NA	NA	NA
11.5.48	650314	656146	11	5	48	9999	NA	N	N	N	N	02/07/2014	N	NA	NA	NA	NA
11.5.5	650348	656161	11	5	5	F	18.5	N	Y	N	N	02/07/2014	N	NA	NA	NA	NA
11.5.5	650348	656161	11	5	5	F	20.1	N	N	N	N	02/07/2014	N	NA	NA	NA	NA
11.5.5	650348	656161	11	5	5	F	38.2	N	N	N	N	02/07/2014	N	NA	NA	NA	NA
11.5.6	650359	656157	11	5	6	F	39.2	N	N	N	N	02/07/2014	N	NA	NA	NA	NA
11.5.6	650359	656157	11	5	6	M	54.5	N	N	N	N	02/07/2014	N	NA	NA	NA	NA
11.5.7	650370	656153	11	5	7	9999	NA	N	N	N	N	02/07/2014	N	NA	NA	NA	NA
11.5.8	650381	656149	11	5	8	F	36.5	N	N	N	N	02/07/2014	N	NA	NA	NA	NA
11.5.9	650392	656145	11	5	9	9999	NA	N	N	N	N	02/07/2014	N	NA	NA	NA	NA
11.6.1	650309	656113	11	6	1	9999	NA	N	N	N	N	02/07/2014	N	NA	NA	NA	NA
11.6.10	650404	656084	11	6	10	9999	NA	N	N	N	N	02/07/2014	N	NA	NA	NA	NA
11.6.11	650415	656081	11	6	11	9999	NA	N	N	N	N	02/07/2014	N	NA	NA	NA	NA
11.6.12	650425	656078	11	6	12	F	34.7	N	N	N	N	02/07/2014	N	NA	NA	NA	NA
11.6.12	650425	656078	11	6	12	F	36.2	N	N	N	N	02/07/2014	N	NA	NA	NA	NA
11.6.13	650436	656075	11	6	13	F	36.1	N	N	N	N	02/07/2014	N	NA	NA	NA	NA
11.6.14	650447	656072	11	6	14	M	35.4	N	N	N	N	02/07/2014	N	NA	NA	NA	NA
11.6.15	650457	656069	11	6	15	F	34.8	N	N	N	N	02/07/2014	N	NA	NA	NA	NA
11.6.15	650457	656069	11	6	15	F	41.7	N	N	N	N	02/07/2014	N	NA	NA	NA	NA
11.6.16	650468	656065	11	6	16	F	30.1	N	N	N	N	02/07/2014	N	NA	NA	NA	NA
11.6.17	650478	656062	11	6	17	9999	NA	N	N	N	N	02/07/2014	N	NA	NA	NA	NA
11.6.18	650489	656059	11	6	18	F	31.2	N	N	N	N	02/07/2014	N	NA	NA	NA	NA
11.6.18	650489	656059	11	6	18	F	37.8	N	Y	N	N	02/07/2014	N	NA	NA	NA	NA
11.6.19	650500	656056	11	6	19	F	34	N	Y	N	N	02/07/2014	N	NA	NA	NA	NA
11.6.19	650500	656056	11	6	19	F	34.2	N	N	N	N	02/07/2014	N	NA	NA	NA	NA
11.6.19	650500	656056	11	6	19	F	44.9	N	N	N	N	02/07/2014	N	NA	NA	NA	NA
11.6.2	650319	656109	11	6	2	9999	NA	N	N	N	N	02/07/2014	N	NA	NA	NA	NA
11.6.20	650510	656053	11	6	20	F	41.7	N	N	N	N	02/07/2014	N	NA	NA	NA	NA
11.6.21	650521	656050	11	6	21	F	33.9	N	N	N	N	02/07/2014	N	NA	NA	NA	NA
11.6.21	650521	656050	11	6	21	M	37.5	N	N	N	N	02/07/2014	N	NA	NA	NA	NA
11.6.22	650532	656046	11	6	22	9999	NA	N	N	N	N	02/07/2014	N	NA	NA	NA	NA
11.6.23	650542	656043	11	6	23	F	33.9	N	N	N	N	02/07/2014	N	NA	NA	NA	NA
11.6.23	650542	656043	11	6	23	F	37.6	N	N	N	N	02/07/2014	N	NA	NA	NA	NA
11.6.24	650553	656040	11	6	24	F	37.2	N	N	N	N	02/07/2014	N	NA	NA	NA	NA
11.6.25	650559	656026	11	6	25	F	37.5	N	N	N	N	02/07/2014	N	NA	NA	NA	NA
11.6.26	650558	656017	11	6	26	M	31	N	N	N	N	02/07/2014	N	NA	NA	NA	NA
11.6.27	650547	656014	11	6	27	M	33.5	N	N	N	N	02/07/2014	N	NA	NA	NA	NA
11.6.28	650536	656012	11	6	28	9999	NA	N	N	N	N	02/07/2014	N	NA	NA	NA	NA
11.6.29	650526	656010	11	6	29	F	35	N	N	N	N	02/07/2014	N	NA	NA	NA	NA
11.6.29	650526	656010	11	6	29	F	40.8	N	N	N	N	02/07/2014	N	NA	NA	NA	NA
11.6.29	650526	656010	11	6	29	F	44.5	N	N	N	N	02/07/2014	N	NA	NA	NA	NA
11.6.29	650526	656010	11	6	29	M	34.6	N	N	N	N	02/07/2014	N	NA	NA	NA	NA
11.6.3	650330	656106	11	6	3	F	36.2	N	N	N	N	02/07/2014	N	NA	NA	NA	NA
11.6.3	650330	656106	11	6	3	F	38.6	N	N	N	N	02/07/2014	N	NA	NA	NA	NA
11.6.30	650515	656010	11	6	30	F	37.2	N	N	N	N	02/07/2014	N	NA	NA	NA	NA
11.6.31	650504	656013	11	6	31	F	34.6	N	N	N	N	02/07/2014	N	NA	NA	NA	NA
11.6.31	650504	656013	11	6	31	F	37.4	N	N	N	N	02/07/2014	N	NA	NA	NA	NA
11.6.32	650494	656016	11	6	32	F	47.3	N	N	N	N	02/07/2014	N	NA	NA	NA	NA
11.6.33	650483	656019	11	6	33	F	35.7	N	N	N	N	02/07/2014	N	NA	NA	NA	NA
11.6.33	650483	656019	11	6	33	M	37	N	N	N	N	02/07/2014	N	NA	NA	NA	NA
11.6.34	650472	656022	11	6	34	9999	NA	N	N	N	N	02/07/2014	N	NA	NA	NA	NA
11.6.35	650462	656024	11	6	35	9999	NA	N	N	N	N	02/07/2014	N	NA	NA	NA	NA
11.6.36	650451	656027	11	6	36	F	36.3	N	N	N	N	02/07/2014	N	NA	NA	NA	NA
11.6.36	650451	656027	11	6	36	M	51.9	N	Y	N	N	02/07/2014	N	NA	NA	NA	NA
11.6.37	650440	656030	11	6	37	9999	NA	N	N	N	N	02/07/2014	N	NA	NA	NA	NA
11.6.37	650440	656030	11	6	37	F	36.8	N	N	N	N	02/07/2014	Y	U	36	0.8	279
11.6.38	650430	656033	11	6	38	F	33.1	N	N	N	N	02/07/2014	N	NA	NA	NA	NA
11.6.38	650430	656033	11	6	38	F	36	N	Y	N	N	02/07/2014	N	NA	NA	NA	NA
11.6.39	650419	656036	11	6	39	9999	NA	N	N	N	N	02/07/2014	N	NA	NA	NA	NA
11.6.4	650341	656103	11	6	4	9999	NA	N	N	N	N	02/07/2014	N	NA	NA	NA	NA
11.6.40	650408	656039	11	6	40	F	33.3	N	Y	N	N	02/07/2014	N	NA	NA	NA	NA
11.6.40	650408	656039	11	6	40	M	34.3	N	N	N	N	02/07/2014	N	NA	NA	NA	NA
11.6.41	650398	656042	11	6	41	F	35.6	N	Y	N	N	02/07/2014	N	NA	NA	NA	NA
11.6.42	650387	656045	11	6	42	F	37.8	N	N	N	N	02/07/2014	N	NA	NA	NA	NA
11.6.42	650387	656045	11	6	42	F	39.9	N	N	N	N	02/07/2014	N	NA	NA	NA	NA
11.6.43	650377	656048	11	6	43	9999	NA	N	N	N	N	02/07/2014	N	NA	NA	NA	NA
11.6.44	650366	656051	11	6	44	9999	NA	N	N	N	N	02/07/2014	N	NA	NA	NA	NA
11.6.45	650355	656053	11	6	45	F	32.1	N	N	N	N	02/07/2014	N	NA	NA	NA	NA
11.6.46	650345	656056	11	6	46	9999	NA	N	N	N	N	02/07/2014	N	NA	NA	NA	NA
11.6.47	650334	656059	11	6	47	9999	NA	N	N	N	N	02/07/2014	N	NA	NA	NA	NA
11.6.48	650323	656062	11	6	48	9999	NA	N	N	N	N	02/07/2014	N	NA	NA	NA	NA
11.6.5	650351	656100	11	6	5	F	37.5	N	N	N	N	02/07/2014	N	NA	NA	NA	NA
11.6.6	650362	656097	11	6	6	F	32	N	N	N	N	02/07/2014	N	NA	NA	NA	NA
11.6.6	650362	656097	11	6	6	F	34	N	N	N	N	02/07/2014	N	NA	NA	NA	NA
11.6.6	650362	656097	11	6	6	F	41.1	N	N	N	N	02/07/2014	N	NA	NA	NA	NA
11.6.6	650362	656097	11	6	6	M	32.8	N	N	N	N	02/07/2014	N	NA	NA	NA	NA
11.6.7	650372	656094	11	6	7	9999	NA	N	N	N	N	02/07/2014	N	NA	NA	NA	NA
11.6.8	650383	656091	11	6	8	9999	NA	N	N	N	N	02/07/2014	N	NA	NA	NA	NA
11.6.9	650394	656087	11	6	9	9999	NA	N	N	N	N	02/07/2014	N	NA	NA	NA	NA
12.1.1	650515	656303	12	1	1	9999	NA	N	N	N	N	07/07/2014	N	NA	NA	NA	NA
12.1.10	650426	656327	12	1	10	9999	NA	N	N	N	N	07/07/2014	N	NA	NA	NA	NA
12.1.11	650416	656329	12	1	11	9999	NA	N	N	N	N	07/07/2014	N	NA	NA	NA	NA
12.1.12	650406	656332	12	1	12	9999	NA	N	N	N	N	07/07/2014	N	NA	NA	NA	NA
12.1.13	650396	656335	12	1	13	9999	NA	N	N	N	N	07/07/2014	N	NA	NA	NA	NA
12.1.14	650386	656337	12	1	14	9999	NA	N	N	N	N	07/07/2014	N	NA	NA	NA	NA
12.1.15	650377	656340	12	1	15	9999	NA	N	N	N	N	07/07/2014	N	NA	NA	NA	NA
12.1.16	650367	656343	12	1	16	9999	NA	N	N	N	N	07/07/2014	N	NA	NA	NA	NA
12.1.17	650357	656345	12	1	17	9999	NA	N	N	N	N	07/07/2014	N	NA	NA	NA	NA
12.1.18	650347	656348	12	1	18	9999	NA	N	N	N	N	07/07/2014	N	NA	NA	NA	NA
12.1.19	650337	656351	12	1	19	9999	NA	N	N	N	N	07/07/2014	N	NA	NA	NA	NA
12.1.2	650505	656305	12	1	2	9999	NA	N	N	N	N	07/07/2014	N	NA	NA	NA	NA
12.1.20	650327	656353	12	1	20	9999	NA	N	N	N	N	07/07/2014	N	NA	NA	NA	NA
12.1.21	650317	656356	12	1	21	9999	NA	N	N	N	N	07/07/2014	N	NA	NA	NA	NA
12.1.22	650307	656359	12	1	22	9999	NA	N	N	N	N	07/07/2014	N	NA	NA	NA	NA
12.1.23	650297	656361	12	1	23	9999	NA	N	N	N	N	07/07/2014	N	NA	NA	NA	NA
12.1.24	650287	656364	12	1	24	9999	NA	N	N	N	N	07/07/2014	N	NA	NA	NA	NA
12.1.25	650278	656367	12	1	25	9999	NA	N	N	N	N	07/07/2014	N	NA	NA	NA	NA
12.1.26	650268	656369	12	1	26	9999	NA	N	N	N	N	07/07/2014	N	NA	NA	NA	NA
12.1.27	650258	656372	12	1	27	9999	NA	N	N	N	N	07/07/2014	N	NA	NA	NA	NA
12.1.28	650248	656375	12	1	28	9999	NA	N	N	N	N	07/07/2014	N	NA	NA	NA	NA
12.1.29	650238	656377	12	1	29	9999	NA	N	N	N	N	07/07/2014	N	NA	NA	NA	NA
12.1.3	650495	656308	12	1	3	9999	NA	N	N	N	N	07/07/2014	N	NA	NA	NA	NA
12.1.30	650228	656380	12	1	30	9999	NA	N	N	N	N	07/07/2014	N	NA	NA	NA	NA
12.1.31	650218	656383	12	1	31	9999	NA	N	N	N	N	07/07/2014	N	NA	NA	NA	NA
12.1.32	650208	656385	12	1	32	9999	NA	N	N	N	N	07/07/2014	N	NA	NA	NA	NA
12.1.33	650198	656388	12	1	33	9999	NA	N	N	N	N	07/07/2014	N	NA	NA	NA	NA
12.1.34	650198	656387	12	1	34	9999	NA	N	N	N	N	07/07/2014	N	NA	NA	NA	NA
12.1.35	650208	656382	12	1	35	9999	NA	N	N	N	N	07/07/2014	N	NA	NA	NA	NA
12.1.36	650218	656377	12	1	36	9999	NA	N	N	N	N	07/07/2014	N	NA	NA	NA	NA
12.1.37	650227	656372	12	1	37	9999	NA	N	N	N	N	07/07/2014	N	NA	NA	NA	NA
12.1.38	650237	656368	12	1	38	9999	NA	N	N	N	N	07/07/2014	N	NA	NA	NA	NA
12.1.39	650246	656363	12	1	39	9999	NA	N	N	N	N	07/07/2014	N	NA	NA	NA	NA
12.1.4	650486	656311	12	1	4	9999	NA	N	N	N	N	07/07/2014	N	NA	NA	NA	NA
12.1.40	650249	656355	12	1	40	9999	NA	N	N	N	N	07/07/2014	N	NA	NA	NA	NA
12.1.41	650242	656343	12	1	41	9999	NA	N	N	N	N	07/07/2014	N	NA	NA	NA	NA
12.1.42	650234	656331	12	1	42	9999	NA	N	N	N	N	07/07/2014	N	NA	NA	NA	NA
12.1.43	650227	656319	12	1	43	9999	NA	N	N	N	N	07/07/2014	N	NA	NA	NA	NA
12.1.44	650219	656308	12	1	44	9999	NA	N	N	N	N	07/07/2014	N	NA	NA	NA	NA
12.1.45	650212	656296	12	1	45	9999	NA	N	N	N	N	07/07/2014	N	NA	NA	NA	NA
12.1.46	650205	656284	12	1	46	F	45.7	N	N	N	N	07/07/2014	N	NA	NA	NA	NA
12.1.47	650197	656272	12	1	47	9999	NA	N	N	N	N	07/07/2014	N	NA	NA	NA	NA
12.1.48	650190	656260	12	1	48	9999	NA	N	N	N	N	07/07/2014	N	NA	NA	NA	NA
12.1.5	650476	656313	12	1	5	9999	NA	N	N	N	N	07/07/2014	N	NA	NA	NA	NA
12.1.6	650466	656316	12	1	6	9999	NA	N	N	N	N	07/07/2014	N	NA	NA	NA	NA
12.1.7	650456	656319	12	1	7	9999	NA	N	N	N	N	07/07/2014	N	NA	NA	NA	NA
12.1.8	650446	656321	12	1	8	9999	NA	N	N	N	N	07/07/2014	N	NA	NA	NA	NA
12.1.9	650436	656324	12	1	9	9999	NA	N	N	N	N	07/07/2014	N	NA	NA	NA	NA
12.2.1	650654	656230	12	2	1	9999	NA	N	N	N	N	07/07/2014	N	NA	NA	NA	NA
12.2.10	650571	656250	12	2	10	9999	NA	N	N	N	N	07/07/2014	N	NA	NA	NA	NA
12.2.11	650562	656252	12	2	11	9999	NA	N	N	N	N	07/07/2014	N	NA	NA	NA	NA
12.2.12	650553	656254	12	2	12	9999	NA	N	N	N	N	07/07/2014	N	NA	NA	NA	NA
12.2.13	650544	656256	12	2	13	9999	NA	N	N	N	N	07/07/2014	N	NA	NA	NA	NA
12.2.14	650535	656258	12	2	14	9999	NA	N	N	N	N	07/07/2014	N	NA	NA	NA	NA
12.2.15	650526	656260	12	2	15	9999	NA	N	N	N	N	07/07/2014	N	NA	NA	NA	NA
12.2.16	650516	656262	12	2	16	9999	NA	N	N	N	N	07/07/2014	N	NA	NA	NA	NA
12.2.17	650507	656265	12	2	17	9999	NA	N	N	N	N	07/07/2014	N	NA	NA	NA	NA
12.2.18	650498	656267	12	2	18	9999	NA	N	N	N	N	07/07/2014	N	NA	NA	NA	NA
12.2.19	650489	656269	12	2	19	9999	NA	N	N	N	N	07/07/2014	N	NA	NA	NA	NA
12.2.2	650645	656232	12	2	2	9999	NA	N	N	N	N	07/07/2014	N	NA	NA	NA	NA
12.2.20	650480	656271	12	2	20	9999	NA	N	N	N	N	07/07/2014	N	NA	NA	NA	NA
12.2.21	650471	656273	12	2	21	9999	NA	N	N	N	N	07/07/2014	N	NA	NA	NA	NA
12.2.22	650462	656275	12	2	22	9999	NA	N	N	N	N	07/07/2014	N	NA	NA	NA	NA
12.2.23	650452	656277	12	2	23	9999	NA	N	N	N	N	07/07/2014	N	NA	NA	NA	NA
12.2.24	650443	656280	12	2	24	9999	NA	N	N	N	N	07/07/2014	N	NA	NA	NA	NA
12.2.25	650434	656282	12	2	25	9999	NA	N	N	N	N	07/07/2014	N	NA	NA	NA	NA
12.2.26	650425	656284	12	2	26	9999	NA	N	N	N	N	07/07/2014	N	NA	NA	NA	NA
12.2.27	650416	656286	12	2	27	9999	NA	N	N	N	N	07/07/2014	N	NA	NA	NA	NA
12.2.28	650407	656288	12	2	28	9999	NA	N	N	N	N	07/07/2014	N	NA	NA	NA	NA
12.2.29	650397	656290	12	2	29	9999	NA	N	N	N	N	07/07/2014	N	NA	NA	NA	NA
12.2.3	650635	656235	12	2	3	9999	NA	N	N	N	N	07/07/2014	N	NA	NA	NA	NA
12.2.30	650388	656292	12	2	30	9999	NA	N	N	N	N	07/07/2014	N	NA	NA	NA	NA
12.2.31	650379	656295	12	2	31	9999	NA	N	N	N	N	07/07/2014	N	NA	NA	NA	NA
12.2.32	650370	656297	12	2	32	9999	NA	N	N	N	N	07/07/2014	N	NA	NA	NA	NA
12.2.33	650361	656299	12	2	33	9999	NA	N	N	N	N	07/07/2014	N	NA	NA	NA	NA
12.2.34	650352	656301	12	2	34	9999	NA	N	N	N	N	07/07/2014	N	NA	NA	NA	NA
12.2.35	650343	656303	12	2	35	9999	NA	N	N	N	N	07/07/2014	N	NA	NA	NA	NA
12.2.36	650334	656303	12	2	36	9999	NA	N	N	N	N	07/07/2014	N	NA	NA	NA	NA
12.2.37	650325	656296	12	2	37	9999	NA	N	N	N	N	07/07/2014	N	NA	NA	NA	NA
12.2.38	650316	656290	12	2	38	9999	NA	N	N	N	N	07/07/2014	N	NA	NA	NA	NA
12.2.39	650308	656284	12	2	39	9999	NA	N	N	N	N	07/07/2014	N	NA	NA	NA	NA
12.2.4	650626	656237	12	2	4	9999	NA	N	N	N	N	07/07/2014	N	NA	NA	NA	NA
12.2.40	650299	656277	12	2	40	9999	NA	N	N	N	N	07/07/2014	N	NA	NA	NA	NA
12.2.41	650291	656271	12	2	41	F	39.8	N	Y	N	N	07/07/2014	N	NA	NA	NA	NA
12.2.42	650282	656265	12	2	42	F	45	N	N	N	N	07/07/2014	N	NA	NA	NA	NA
12.2.43	650273	656258	12	2	43	9999	NA	N	N	N	N	07/07/2014	N	NA	NA	NA	NA
12.2.44	650265	656252	12	2	44	9999	NA	N	N	N	N	07/07/2014	N	NA	NA	NA	NA
12.2.45	650256	656246	12	2	45	9999	NA	N	N	N	N	07/07/2014	N	NA	NA	NA	NA
12.2.46	650248	656239	12	2	46	M	50.7	N	N	N	N	07/07/2014	N	NA	NA	NA	NA
12.2.47	650239	656233	12	2	47	F	39.3	N	N	N	N	07/07/2014	N	NA	NA	NA	NA
12.2.48	650230	656227	12	2	48	9999	NA	N	N	N	N	07/07/2014	N	NA	NA	NA	NA
12.2.5	650617	656239	12	2	5	9999	NA	N	N	N	N	07/07/2014	N	NA	NA	NA	NA
12.2.6	650608	656241	12	2	6	9999	NA	N	N	N	N	07/07/2014	N	NA	NA	NA	NA
12.2.7	650599	656243	12	2	7	9999	NA	N	N	N	N	07/07/2014	N	NA	NA	NA	NA
12.2.8	650590	656245	12	2	8	9999	NA	N	N	N	N	07/07/2014	N	NA	NA	NA	NA
12.2.9	650581	656247	12	2	9	9999	NA	N	N	N	N	07/07/2014	N	NA	NA	NA	NA
12.3.1	650343	656293	12	3	1	9999	NA	N	N	N	N	07/07/2014	N	NA	NA	NA	NA
12.3.10	650442	656254	12	3	10	9999	NA	N	N	N	N	07/07/2014	N	NA	NA	NA	NA
12.3.11	650453	656249	12	3	11	9999	NA	N	N	N	N	07/07/2014	N	NA	NA	NA	NA
12.3.12	650464	656245	12	3	12	9999	NA	N	N	N	N	07/07/2014	N	NA	NA	NA	NA
12.3.13	650475	656240	12	3	13	M	35.5	N	N	N	N	07/07/2014	N	NA	NA	NA	NA
12.3.14	650486	656236	12	3	14	F	47	N	Y	N	N	07/07/2014	N	NA	NA	NA	NA
12.3.14	650486	656236	12	3	14	M	38.6	N	N	N	N	07/07/2014	N	NA	NA	NA	NA
12.3.15	650497	656232	12	3	15	M	33.8	N	N	N	N	07/07/2014	N	NA	NA	NA	NA
12.3.16	650508	656227	12	3	16	9999	NA	N	N	N	N	07/07/2014	N	NA	NA	NA	NA
12.3.17	650519	656223	12	3	17	F	35.4	N	N	N	N	07/07/2014	N	NA	NA	NA	NA
12.3.17	650519	656223	12	3	17	F	45	N	N	N	N	07/07/2014	N	NA	NA	NA	NA
12.3.17	650519	656223	12	3	17	M	33	N	N	N	N	07/07/2014	N	NA	NA	NA	NA
12.3.18	650530	656218	12	3	18	9999	NA	N	N	N	N	07/07/2014	N	NA	NA	NA	NA
12.3.19	650541	656214	12	3	19	9999	NA	N	N	N	N	07/07/2014	N	NA	NA	NA	NA
12.3.2	650354	656289	12	3	2	9999	NA	N	N	N	N	07/07/2014	N	NA	NA	NA	NA
12.3.20	650552	656209	12	3	20	F	30.4	N	N	N	N	07/07/2014	N	NA	NA	NA	NA
12.3.20	650552	656209	12	3	20	M	37	N	N	N	N	07/07/2014	N	NA	NA	NA	NA
12.3.21	650563	656205	12	3	21	F	37.7	N	N	N	N	07/07/2014	N	NA	NA	NA	NA
12.3.22	650574	656201	12	3	22	9999	NA	N	N	N	N	07/07/2014	N	NA	NA	NA	NA
12.3.23	650585	656196	12	3	23	F	32.7	N	N	N	N	07/07/2014	N	NA	NA	NA	NA
12.3.23	650585	656196	12	3	23	F	37.9	N	N	N	N	07/07/2014	N	NA	NA	NA	NA
12.3.24	650590	656179	12	3	24	9999	NA	N	N	N	N	07/07/2014	N	NA	NA	NA	NA
12.3.25	650586	656172	12	3	25	9999	NA	N	N	N	N	07/07/2014	N	NA	NA	NA	NA
12.3.26	650574	656171	12	3	26	9999	NA	N	N	N	N	07/07/2014	N	NA	NA	NA	NA
12.3.27	650563	656174	12	3	27	9999	NA	N	N	N	N	07/07/2014	N	NA	NA	NA	NA
12.3.28	650552	656178	12	3	28	9999	NA	N	N	N	N	07/07/2014	N	NA	NA	NA	NA
12.3.29	650541	656183	12	3	29	9999	NA	N	N	N	N	07/07/2014	N	NA	NA	NA	NA
12.3.3	650365	656284	12	3	3	9999	NA	N	N	N	N	07/07/2014	N	NA	NA	NA	NA
12.3.30	650530	656187	12	3	30	F	38.3	N	N	N	N	07/07/2014	N	NA	NA	NA	NA
12.3.31	650519	656191	12	3	31	9999	NA	N	N	N	N	07/07/2014	N	NA	NA	NA	NA
12.3.32	650508	656196	12	3	32	9999	NA	N	N	N	N	07/07/2014	N	NA	NA	NA	NA
12.3.33	650497	656200	12	3	33	F	36.4	N	N	N	N	07/07/2014	N	NA	NA	NA	NA
12.3.33	650497	656200	12	3	33	F	38	N	N	N	N	07/07/2014	N	NA	NA	NA	NA
12.3.34	650486	656204	12	3	34	9999	NA	N	N	N	N	07/07/2014	N	NA	NA	NA	NA
12.3.35	650475	656209	12	3	35	F	32.1	N	N	N	N	07/07/2014	N	NA	NA	NA	NA
12.3.36	650464	656213	12	3	36	9999	NA	N	N	N	N	07/07/2014	N	NA	NA	NA	NA
12.3.37	650453	656218	12	3	37	F	39.5	N	N	N	N	07/07/2014	N	NA	NA	NA	NA
12.3.38	650442	656222	12	3	38	9999	NA	N	N	N	N	07/07/2014	N	NA	NA	NA	NA
12.3.39	650431	656226	12	3	39	9999	NA	N	N	N	N	07/07/2014	N	NA	NA	NA	NA
12.3.4	650376	656280	12	3	4	9999	NA	N	N	N	N	07/07/2014	N	NA	NA	NA	NA
12.3.40	650420	656231	12	3	40	M	46	N	N	N	N	07/07/2014	N	NA	NA	NA	NA
12.3.41	650409	656235	12	3	41	9999	NA	N	N	N	N	07/07/2014	N	NA	NA	NA	NA
12.3.42	650398	656239	12	3	42	9999	NA	N	N	N	N	07/07/2014	N	NA	NA	NA	NA
12.3.43	650387	656244	12	3	43	9999	NA	N	N	N	N	07/07/2014	N	NA	NA	NA	NA
12.3.44	650376	656248	12	3	44	9999	NA	N	N	N	N	07/07/2014	N	NA	NA	NA	NA
12.3.45	650365	656253	12	3	45	M	52	N	N	N	N	07/07/2014	N	NA	NA	NA	NA
12.3.46	650353	656257	12	3	46	9999	NA	N	N	N	N	07/07/2014	N	NA	NA	NA	NA
12.3.47	650342	656261	12	3	47	9999	NA	N	N	N	N	07/07/2014	N	NA	NA	NA	NA
12.3.48	650331	656266	12	3	48	9999	NA	N	N	N	N	07/07/2014	N	NA	NA	NA	NA
12.3.5	650387	656276	12	3	5	9999	NA	N	N	N	N	07/07/2014	N	NA	NA	NA	NA
12.3.6	650398	656271	12	3	6	9999	NA	N	N	N	N	07/07/2014	N	NA	NA	NA	NA
12.3.7	650409	656267	12	3	7	9999	NA	N	N	N	N	07/07/2014	N	NA	NA	NA	NA
12.3.8	650420	656262	12	3	8	9999	NA	N	N	N	N	07/07/2014	N	NA	NA	NA	NA
12.3.9	650431	656258	12	3	9	9999	NA	N	N	N	N	07/07/2014	N	NA	NA	NA	NA
12.4.1	650313	656242	12	4	1	9999	NA	N	N	N	N	07/07/2014	N	NA	NA	NA	NA
12.4.10	650415	656202	12	4	10	9999	NA	N	N	N	N	07/07/2014	N	NA	NA	NA	NA
12.4.11	650426	656198	12	4	11	9999	NA	N	N	N	N	07/07/2014	N	NA	NA	NA	NA
12.4.12	650437	656193	12	4	12	9999	NA	N	N	N	N	07/07/2014	N	NA	NA	NA	NA
12.4.13	650449	656189	12	4	13	9999	NA	N	N	N	N	07/07/2014	N	NA	NA	NA	NA
12.4.14	650460	656184	12	4	14	9999	NA	N	N	N	N	07/07/2014	N	NA	NA	NA	NA
12.4.15	650471	656180	12	4	15	F	37	N	N	N	N	07/07/2014	N	NA	NA	NA	NA
12.4.15	650471	656180	12	4	15	M	42	N	N	N	N	07/07/2014	N	NA	NA	NA	NA
12.4.16	650483	656175	12	4	16	9999	NA	N	N	N	N	07/07/2014	N	NA	NA	NA	NA
12.4.17	650494	656171	12	4	17	9999	NA	N	N	N	N	07/07/2014	N	NA	NA	NA	NA
12.4.18	650505	656167	12	4	18	F	30.5	N	N	N	N	07/07/2014	N	NA	NA	NA	NA
12.4.18	650505	656167	12	4	18	M	32.4	N	N	N	N	07/07/2014	N	NA	NA	NA	NA
12.4.19	650516	656162	12	4	19	9999	NA	N	N	N	N	07/07/2014	N	NA	NA	NA	NA
12.4.2	650324	656237	12	4	2	9999	NA	N	N	N	N	07/07/2014	N	NA	NA	NA	NA
12.4.20	650528	656158	12	4	20	9999	NA	N	N	N	N	07/07/2014	N	NA	NA	NA	NA
12.4.21	650539	656153	12	4	21	F	37.5	N	N	N	N	07/07/2014	N	NA	NA	NA	NA
12.4.22	650550	656149	12	4	22	9999	NA	N	N	N	N	07/07/2014	N	NA	NA	NA	NA
12.4.23	650562	656145	12	4	23	9999	NA	N	N	N	N	07/07/2014	N	NA	NA	NA	NA
12.4.24	650573	656140	12	4	24	9999	NA	N	N	N	N	07/07/2014	N	NA	NA	NA	NA
12.4.25	650574	656124	12	4	25	M	27.9	N	N	N	N	07/07/2014	N	NA	NA	NA	NA
12.4.26	650563	656119	12	4	26	M	54.6	N	N	N	N	07/07/2014	N	NA	NA	NA	NA
12.4.27	650552	656115	12	4	27	F	32.9	N	N	N	N	07/07/2014	N	NA	NA	NA	NA
12.4.27	650552	656115	12	4	27	F	39.8	N	N	N	N	07/07/2014	N	NA	NA	NA	NA
12.4.28	650540	656117	12	4	28	9999	NA	N	N	N	N	07/07/2014	N	NA	NA	NA	NA
12.4.29	650529	656121	12	4	29	9999	NA	N	N	N	N	07/07/2014	N	NA	NA	NA	NA
12.4.3	650336	656233	12	4	3	9999	NA	N	N	N	N	07/07/2014	N	NA	NA	NA	NA
12.4.30	650518	656126	12	4	30	9999	NA	N	N	N	N	07/07/2014	N	NA	NA	NA	NA
12.4.31	650506	656130	12	4	31	F	36.4	N	N	N	N	07/07/2014	N	NA	NA	NA	NA
12.4.31	650506	656130	12	4	31	M	33.5	N	N	N	N	07/07/2014	N	NA	NA	NA	NA
12.4.32	650495	656134	12	4	32	9999	NA	N	N	N	N	07/07/2014	N	NA	NA	NA	NA
12.4.33	650484	656139	12	4	33	F	39.6	N	N	N	N	07/07/2014	N	NA	NA	NA	NA
12.4.34	650472	656143	12	4	34	F	37.5	N	N	N	N	07/07/2014	N	NA	NA	NA	NA
12.4.35	650461	656148	12	4	35	F	37.2	N	N	N	N	07/07/2014	N	NA	NA	NA	NA
12.4.36	650450	656152	12	4	36	9999	NA	N	N	N	N	07/07/2014	N	NA	NA	NA	NA
12.4.37	650438	656156	12	4	37	F	35.7	N	N	N	N	07/07/2014	N	NA	NA	NA	NA
12.4.38	650427	656161	12	4	38	F	34.2	N	N	N	N	07/07/2014	N	NA	NA	NA	NA
12.4.38	650427	656161	12	4	38	F	38.1	N	N	N	N	07/07/2014	N	NA	NA	NA	NA
12.4.38	650427	656161	12	4	38	M	35.7	N	N	N	N	07/07/2014	N	NA	NA	NA	NA
12.4.39	650416	656165	12	4	39	M	36.4	N	N	N	N	07/07/2014	N	NA	NA	NA	NA
12.4.39	650416	656165	12	4	39	M	37.6	N	N	N	N	07/07/2014	N	NA	NA	NA	NA
12.4.4	650347	656228	12	4	4	9999	NA	N	N	N	N	07/07/2014	N	NA	NA	NA	NA
12.4.40	650405	656170	12	4	40	9999	NA	N	N	N	N	07/07/2014	N	NA	NA	NA	NA
12.4.41	650393	656174	12	4	41	F	32.1	N	N	N	N	07/07/2014	N	NA	NA	NA	NA
12.4.41	650393	656174	12	4	41	F	36.7	N	N	N	N	07/07/2014	N	NA	NA	NA	NA
12.4.42	650382	656178	12	4	42	9999	NA	N	N	N	N	07/07/2014	N	NA	NA	NA	NA
12.4.43	650371	656183	12	4	43	9999	NA	N	N	N	N	07/07/2014	N	NA	NA	NA	NA
12.4.44	650359	656187	12	4	44	9999	NA	N	N	N	N	07/07/2014	N	NA	NA	NA	NA
12.4.45	650348	656192	12	4	45	9999	NA	N	N	N	N	07/07/2014	N	NA	NA	NA	NA
12.4.46	650337	656196	12	4	46	9999	NA	N	N	N	N	07/07/2014	N	NA	NA	NA	NA
12.4.47	650326	656200	12	4	47	9999	NA	N	N	N	N	07/07/2014	N	NA	NA	NA	NA
12.4.48	650314	656205	12	4	48	9999	NA	N	N	N	N	07/07/2014	N	NA	NA	NA	NA
12.4.5	650358	656224	12	4	5	F	34.8	N	N	N	N	07/07/2014	N	NA	NA	NA	NA
12.4.6	650370	656220	12	4	6	M	39.4	N	Y	N	N	07/07/2014	N	NA	NA	NA	NA
12.4.7	650381	656215	12	4	7	9999	NA	N	N	N	N	07/07/2014	N	NA	NA	NA	NA
12.4.8	650392	656211	12	4	8	9999	NA	N	N	N	N	07/07/2014	N	NA	NA	NA	NA
12.4.9	650403	656206	12	4	9	F	33	N	N	N	N	07/07/2014	Y	383	31.5	1.5	164
12.4.9	650403	656206	12	4	9	F	36	N	N	N	N	07/07/2014	N	NA	NA	NA	NA
12.4.9	650403	656206	12	4	9	F	36.5	N	N	N	N	07/07/2014	N	NA	NA	NA	NA
12.5.1	650305	656177	12	5	1	9999	NA	N	N	N	N	07/07/2014	N	NA	NA	NA	NA
12.5.10	650403	656142	12	5	10	9999	NA	N	N	N	N	07/07/2014	N	NA	NA	NA	NA
12.5.11	650413	656138	12	5	11	F	34.9	N	N	N	N	07/07/2014	N	NA	NA	NA	NA
12.5.11	650413	656138	12	5	11	F	38.8	N	N	N	N	07/07/2014	N	NA	NA	NA	NA
12.5.12	650424	656134	12	5	12	M	47.8	N	Y	N	N	07/07/2014	N	NA	NA	NA	NA
12.5.13	650435	656130	12	5	13	9999	NA	N	N	N	N	07/07/2014	N	NA	NA	NA	NA
12.5.14	650446	656126	12	5	14	9999	NA	N	N	N	N	07/07/2014	N	NA	NA	NA	NA
12.5.15	650457	656122	12	5	15	F	36.8	N	N	N	N	07/07/2014	N	NA	NA	NA	NA
12.5.16	650468	656118	12	5	16	9999	NA	N	N	N	N	07/07/2014	N	NA	NA	NA	NA
12.5.17	650478	656114	12	5	17	9999	NA	N	N	N	N	07/07/2014	N	NA	NA	NA	NA
12.5.18	650489	656110	12	5	18	9999	NA	N	N	N	N	07/07/2014	N	NA	NA	NA	NA
12.5.19	650500	656106	12	5	19	9999	NA	N	N	N	N	07/07/2014	N	NA	NA	NA	NA
12.5.2	650316	656173	12	5	2	F	32	N	N	N	N	07/07/2014	N	NA	NA	NA	NA
12.5.20	650511	656102	12	5	20	F	34.8	N	N	N	N	07/07/2014	N	NA	NA	NA	NA
12.5.20	650511	656102	12	5	20	F	35.2	N	Y	N	N	07/07/2014	N	NA	NA	NA	NA
12.5.20	650511	656102	12	5	20	F	37.3	N	Y	N	N	07/07/2014	N	NA	NA	NA	NA
12.5.21	650522	656098	12	5	21	F	33.2	N	N	N	N	07/07/2014	N	NA	NA	NA	NA
12.5.22	650533	656094	12	5	22	9999	NA	N	N	N	N	07/07/2014	N	NA	NA	NA	NA
12.5.23	650543	656090	12	5	23	F	32.8	N	N	N	N	07/07/2014	N	NA	NA	NA	NA
12.5.24	650554	656086	12	5	24	9999	NA	N	N	N	N	07/07/2014	N	NA	NA	NA	NA
12.5.25	650560	656073	12	5	25	F	33.2	N	N	N	N	07/07/2014	N	NA	NA	NA	NA
12.5.26	650553	656068	12	5	26	9999	NA	N	N	N	N	07/07/2014	N	NA	NA	NA	NA
12.5.27	650542	656066	12	5	27	9999	NA	N	N	N	N	07/07/2014	N	NA	NA	NA	NA
12.5.28	650530	656064	12	5	28	9999	NA	N	N	N	N	07/07/2014	N	NA	NA	NA	NA
12.5.29	650520	656067	12	5	29	9999	NA	N	N	N	N	07/07/2014	N	NA	NA	NA	NA
12.5.3	650327	656169	12	5	3	9999	NA	N	N	N	N	07/07/2014	N	NA	NA	NA	NA
12.5.30	650509	656071	12	5	30	9999	NA	N	N	N	N	07/07/2014	N	NA	NA	NA	NA
12.5.31	650498	656075	12	5	31	F	32.9	N	N	N	N	07/07/2014	N	NA	NA	NA	NA
12.5.32	650487	656080	12	5	32	9999	NA	N	N	N	N	07/07/2014	N	NA	NA	NA	NA
12.5.33	650476	656084	12	5	33	9999	NA	N	N	N	N	07/07/2014	N	NA	NA	NA	NA
12.5.34	650465	656088	12	5	34	9999	NA	N	N	N	N	07/07/2014	N	NA	NA	NA	NA
12.5.35	650455	656092	12	5	35	M	44	N	N	N	N	07/07/2014	N	NA	NA	NA	NA
12.5.36	650444	656096	12	5	36	F	32.4	N	N	N	N	07/07/2014	N	NA	NA	NA	NA
12.5.37	650433	656100	12	5	37	9999	NA	N	N	N	N	07/07/2014	N	NA	NA	NA	NA
12.5.38	650422	656104	12	5	38	9999	NA	N	N	N	N	07/07/2014	N	NA	NA	NA	NA
12.5.39	650411	656109	12	5	39	F	35.8	N	N	N	N	07/07/2014	N	NA	NA	NA	NA
12.5.4	650338	656165	12	5	4	F	35.1	N	N	N	N	07/07/2014	N	NA	NA	NA	NA
12.5.40	650401	656113	12	5	40	F	35.1	N	N	N	N	07/07/2014	N	NA	NA	NA	NA
12.5.41	650390	656117	12	5	41	9999	NA	N	N	N	N	07/07/2014	N	NA	NA	NA	NA
12.5.42	650379	656121	12	5	42	9999	NA	N	N	N	N	07/07/2014	N	NA	NA	NA	NA
12.5.43	650368	656125	12	5	43	9999	NA	N	N	N	N	07/07/2014	N	NA	NA	NA	NA
12.5.44	650357	656129	12	5	44	9999	NA	N	N	N	N	07/07/2014	N	NA	NA	NA	NA
12.5.45	650347	656133	12	5	45	9999	NA	N	N	N	N	07/07/2014	N	NA	NA	NA	NA
12.5.46	650336	656138	12	5	46	9999	NA	N	N	N	N	07/07/2014	N	NA	NA	NA	NA
12.5.47	650325	656142	12	5	47	9999	NA	N	N	N	N	07/07/2014	N	NA	NA	NA	NA
12.5.48	650314	656146	12	5	48	9999	NA	N	N	N	N	07/07/2014	N	NA	NA	NA	NA
12.5.5	650348	656161	12	5	5	9999	NA	N	N	N	N	07/07/2014	N	NA	NA	NA	NA
12.5.6	650359	656157	12	5	6	F	37.7	N	N	N	N	07/07/2014	N	NA	NA	NA	NA
12.5.7	650370	656153	12	5	7	9999	NA	N	N	N	N	07/07/2014	N	NA	NA	NA	NA
12.5.8	650381	656149	12	5	8	9999	NA	N	N	N	N	07/07/2014	N	NA	NA	NA	NA
12.5.9	650392	656145	12	5	9	9999	NA	N	N	N	N	07/07/2014	N	NA	NA	NA	NA
12.6.1	650309	656113	12	6	1	9999	NA	N	N	N	N	07/07/2014	N	NA	NA	NA	NA
12.6.10	650404	656084	12	6	10	9999	NA	N	N	N	N	07/07/2014	N	NA	NA	NA	NA
12.6.11	650415	656081	12	6	11	9999	NA	N	N	N	N	07/07/2014	N	NA	NA	NA	NA
12.6.12	650425	656078	12	6	12	9999	NA	N	N	N	N	07/07/2014	N	NA	NA	NA	NA
12.6.13	650436	656075	12	6	13	9999	NA	N	N	N	N	07/07/2014	N	NA	NA	NA	NA
12.6.14	650447	656072	12	6	14	9999	NA	N	N	N	N	07/07/2014	N	NA	NA	NA	NA
12.6.15	650457	656069	12	6	15	F	37	N	N	N	N	07/07/2014	N	NA	NA	NA	NA
12.6.16	650468	656065	12	6	16	9999	NA	N	N	N	N	07/07/2014	N	NA	NA	NA	NA
12.6.17	650478	656062	12	6	17	9999	NA	N	N	N	N	07/07/2014	N	NA	NA	NA	NA
12.6.18	650489	656059	12	6	18	9999	NA	N	N	N	N	07/07/2014	N	NA	NA	NA	NA
12.6.19	650500	656056	12	6	19	9999	NA	N	N	N	N	07/07/2014	N	NA	NA	NA	NA
12.6.2	650319	656109	12	6	2	9999	NA	N	N	N	N	07/07/2014	N	NA	NA	NA	NA
12.6.20	650510	656053	12	6	20	9999	NA	N	N	N	N	07/07/2014	N	NA	NA	NA	NA
12.6.21	650521	656050	12	6	21	9999	NA	N	N	N	N	07/07/2014	N	NA	NA	NA	NA
12.6.22	650532	656046	12	6	22	9999	NA	N	N	N	N	07/07/2014	N	NA	NA	NA	NA
12.6.23	650542	656043	12	6	23	9999	NA	N	N	N	N	07/07/2014	N	NA	NA	NA	NA
12.6.24	650553	656040	12	6	24	F	36.7	N	N	N	N	07/07/2014	N	NA	NA	NA	NA
12.6.25	650559	656026	12	6	25	9999	NA	N	N	N	N	07/07/2014	N	NA	NA	NA	NA
12.6.26	650558	656017	12	6	26	F	35.6	N	Y	N	N	07/07/2014	N	NA	NA	NA	NA
12.6.27	650547	656014	12	6	27	9999	NA	N	N	N	N	07/07/2014	N	NA	NA	NA	NA
12.6.28	650536	656012	12	6	28	9999	NA	N	N	N	N	07/07/2014	N	NA	NA	NA	NA
12.6.29	650526	656010	12	6	29	F	39.3	N	N	N	N	07/07/2014	N	NA	NA	NA	NA
12.6.3	650330	656106	12	6	3	9999	NA	N	N	N	N	07/07/2014	N	NA	NA	NA	NA
12.6.30	650515	656010	12	6	30	F	37.4	N	N	N	N	07/07/2014	Y	383	36	1.4	348
12.6.30	650515	656010	12	6	30	M	38.1	N	N	N	N	07/07/2014	N	NA	NA	NA	NA
12.6.30	650515	656010	12	6	30	M	57	N	N	N	N	07/07/2014	N	NA	NA	NA	NA
12.6.31	650504	656013	12	6	31	F	37.6	N	Y	N	N	07/07/2014	N	NA	NA	NA	NA
12.6.32	650494	656016	12	6	32	M	36.5	N	N	N	N	07/07/2014	N	NA	NA	NA	NA
12.6.33	650483	656019	12	6	33	9999	NA	N	N	N	N	07/07/2014	N	NA	NA	NA	NA
12.6.34	650472	656022	12	6	34	9999	NA	N	N	N	N	07/07/2014	N	NA	NA	NA	NA
12.6.35	650462	656024	12	6	35	M	32.1	N	N	N	N	07/07/2014	N	NA	NA	NA	NA
12.6.36	650451	656027	12	6	36	9999	NA	N	N	N	N	07/07/2014	N	NA	NA	NA	NA
12.6.37	650440	656030	12	6	37	9999	NA	N	N	N	N	07/07/2014	N	NA	NA	NA	NA
12.6.38	650430	656033	12	6	38	9999	NA	N	N	N	N	07/07/2014	N	NA	NA	NA	NA
12.6.39	650419	656036	12	6	39	9999	NA	N	N	N	N	07/07/2014	N	NA	NA	NA	NA
12.6.4	650341	656103	12	6	4	9999	NA	N	N	N	N	07/07/2014	N	NA	NA	NA	NA
12.6.40	650408	656039	12	6	40	9999	NA	N	N	N	N	07/07/2014	N	NA	NA	NA	NA
12.6.41	650398	656042	12	6	41	9999	NA	N	N	N	N	07/07/2014	N	NA	NA	NA	NA
12.6.42	650387	656045	12	6	42	9999	NA	N	N	N	N	07/07/2014	N	NA	NA	NA	NA
12.6.43	650377	656048	12	6	43	9999	NA	N	N	N	N	07/07/2014	N	NA	NA	NA	NA
12.6.44	650366	656051	12	6	44	9999	NA	N	N	N	N	07/07/2014	N	NA	NA	NA	NA
12.6.45	650355	656053	12	6	45	9999	NA	N	N	N	N	07/07/2014	N	NA	NA	NA	NA
12.6.46	650345	656056	12	6	46	9999	NA	N	N	N	N	07/07/2014	N	NA	NA	NA	NA
12.6.47	650334	656059	12	6	47	F	29.7	N	N	N	N	07/07/2014	N	NA	NA	NA	NA
12.6.47	650334	656059	12	6	47	F	42.7	N	Y	N	N	07/07/2014	N	NA	NA	NA	NA
12.6.48	650323	656062	12	6	48	9999	NA	N	N	N	N	07/07/2014	N	NA	NA	NA	NA
12.6.5	650351	656100	12	6	5	9999	NA	N	N	N	N	07/07/2014	N	NA	NA	NA	NA
12.6.6	650362	656097	12	6	6	9999	NA	N	N	N	N	07/07/2014	N	NA	NA	NA	NA
12.6.7	650372	656094	12	6	7	9999	NA	N	N	N	N	07/07/2014	N	NA	NA	NA	NA
12.6.8	650383	656091	12	6	8	9999	NA	N	N	N	N	07/07/2014	N	NA	NA	NA	NA
12.6.9	650394	656087	12	6	9	9999	NA	N	N	N	N	07/07/2014	N	NA	NA	NA	NA
13.1.1	650561	656529	13	1	1	9999	NA	N	N	N	N	25/07/2014	N	NA	NA	NA	NA
13.1.1	650561	656529	13	1	1	U	U	N	N	N	N	25/07/2014	Y	U	33.4	U	441
13.1.10	650458	656544	13	1	10	9999	NA	N	N	N	N	25/07/2014	N	NA	NA	NA	NA
13.1.11	650446	656546	13	1	11	9999	NA	N	N	N	N	25/07/2014	N	NA	NA	NA	NA
13.1.12	650435	656547	13	1	12	9999	NA	N	N	N	N	25/07/2014	N	NA	NA	NA	NA
13.1.13	650423	656549	13	1	13	9999	NA	N	N	N	N	25/07/2014	N	NA	NA	NA	NA
13.1.14	650412	656550	13	1	14	9999	NA	N	N	N	N	25/07/2014	N	NA	NA	NA	NA
13.1.15	650400	656552	13	1	15	9999	NA	N	N	N	N	25/07/2014	N	NA	NA	NA	NA
13.1.16	650389	656554	13	1	16	9999	NA	N	N	N	N	25/07/2014	N	NA	NA	NA	NA
13.1.17	650378	656555	13	1	17	9999	NA	N	N	N	N	25/07/2014	N	NA	NA	NA	NA
13.1.18	650366	656557	13	1	18	9999	NA	N	N	N	N	25/07/2014	N	NA	NA	NA	NA
13.1.19	650355	656559	13	1	19	9999	NA	N	N	N	N	25/07/2014	N	NA	NA	NA	NA
13.1.2	650550	656531	13	1	2	9999	NA	N	N	N	N	25/07/2014	N	NA	NA	NA	NA
13.1.20	650343	656560	13	1	20	9999	NA	N	N	N	N	25/07/2014	N	NA	NA	NA	NA
13.1.21	650332	656562	13	1	21	F	45.1	N	N	N	N	25/07/2014	N	NA	NA	NA	NA
13.1.22	650320	656563	13	1	22	9999	NA	N	N	N	N	25/07/2014	N	NA	NA	NA	NA
13.1.23	650309	656565	13	1	23	9999	NA	N	N	N	N	25/07/2014	N	NA	NA	NA	NA
13.1.24	650297	656567	13	1	24	9999	NA	N	N	N	N	25/07/2014	N	NA	NA	NA	NA
13.1.25	650287	656560	13	1	25	9999	NA	N	N	N	N	25/07/2014	N	NA	NA	NA	NA
13.1.26	650277	656549	13	1	26	9999	NA	N	N	N	N	25/07/2014	N	NA	NA	NA	NA
13.1.27	650274	656537	13	1	27	9999	NA	N	N	N	N	25/07/2014	N	NA	NA	NA	NA
13.1.28	650282	656525	13	1	28	9999	NA	N	N	N	N	25/07/2014	N	NA	NA	NA	NA
13.1.29	650291	656513	13	1	29	9999	NA	N	N	N	N	25/07/2014	N	NA	NA	NA	NA
13.1.3	650538	656533	13	1	3	9999	NA	N	N	N	N	25/07/2014	N	NA	NA	NA	NA
13.1.30	650302	656510	13	1	30	9999	NA	N	N	N	N	25/07/2014	N	NA	NA	NA	NA
13.1.31	650314	656508	13	1	31	9999	NA	N	N	N	N	25/07/2014	N	NA	NA	NA	NA
13.1.32	650325	656507	13	1	32	9999	NA	N	N	N	N	25/07/2014	N	NA	NA	NA	NA
13.1.33	650337	656505	13	1	33	9999	NA	N	N	N	N	25/07/2014	N	NA	NA	NA	NA
13.1.34	650348	656504	13	1	34	9999	NA	N	N	N	N	25/07/2014	N	NA	NA	NA	NA
13.1.35	650360	656502	13	1	35	9999	NA	N	N	N	N	25/07/2014	N	NA	NA	NA	NA
13.1.36	650371	656500	13	1	36	9999	NA	N	N	N	N	25/07/2014	N	NA	NA	NA	NA
13.1.37	650383	656499	13	1	37	9999	NA	N	N	N	N	25/07/2014	N	NA	NA	NA	NA
13.1.38	650394	656497	13	1	38	9999	NA	N	N	N	N	25/07/2014	N	NA	NA	NA	NA
13.1.39	650406	656496	13	1	39	9999	NA	N	N	N	N	25/07/2014	N	NA	NA	NA	NA
13.1.4	650527	656534	13	1	4	9999	NA	N	N	N	N	25/07/2014	N	NA	NA	NA	NA
13.1.40	650417	656494	13	1	40	9999	NA	N	N	N	N	25/07/2014	N	NA	NA	NA	NA
13.1.41	650429	656492	13	1	41	F	34.1	N	N	N	N	25/07/2014	N	NA	NA	NA	NA
13.1.42	650440	656491	13	1	42	9999	NA	N	N	N	N	25/07/2014	N	NA	NA	NA	NA
13.1.43	650452	656489	13	1	43	9999	NA	N	N	N	N	25/07/2014	N	NA	NA	NA	NA
13.1.44	650463	656487	13	1	44	M	41.8	N	N	N	N	25/07/2014	N	NA	NA	NA	NA
13.1.45	650475	656486	13	1	45	9999	NA	N	N	N	N	25/07/2014	N	NA	NA	NA	NA
13.1.46	650486	656484	13	1	46	9999	NA	N	N	N	N	25/07/2014	N	NA	NA	NA	NA
13.1.47	650498	656483	13	1	47	9999	NA	N	N	N	N	25/07/2014	N	NA	NA	NA	NA
13.1.48	650498	656483	13	1	48	9999	NA	N	N	N	N	25/07/2014	N	NA	NA	NA	NA
13.1.5	650515	656536	13	1	5	9999	NA	N	N	N	N	25/07/2014	N	NA	NA	NA	NA
13.1.6	650504	656537	13	1	6	9999	NA	N	N	N	N	25/07/2014	N	NA	NA	NA	NA
13.1.7	650492	656539	13	1	7	9999	NA	N	N	N	N	25/07/2014	N	NA	NA	NA	NA
13.1.8	650481	656541	13	1	8	9999	NA	N	N	N	N	25/07/2014	N	NA	NA	NA	NA
13.1.9	650469	656542	13	1	9	9999	NA	N	N	N	N	25/07/2014	N	NA	NA	NA	NA
13.2.1	650652	656715	13	2	1	9999	NA	N	N	N	N	25/07/2014	N	NA	NA	NA	NA
13.2.10	650645	656584	13	2	10	9999	NA	N	N	N	N	25/07/2014	N	NA	NA	NA	NA
13.2.11	650644	656569	13	2	11	9999	NA	N	N	N	N	25/07/2014	N	NA	NA	NA	NA
13.2.12	650643	656555	13	2	12	9999	NA	N	N	N	N	25/07/2014	N	NA	NA	NA	NA
13.2.13	650643	656540	13	2	13	9999	NA	N	N	N	N	25/07/2014	N	NA	NA	NA	NA
13.2.14	650642	656526	13	2	14	9999	NA	N	N	N	N	25/07/2014	N	NA	NA	NA	NA
13.2.15	650641	656511	13	2	15	9999	NA	N	N	N	N	25/07/2014	N	NA	NA	NA	NA
13.2.16	650640	656497	13	2	16	9999	NA	N	N	N	N	25/07/2014	N	NA	NA	NA	NA
13.2.17	650640	656482	13	2	17	9999	NA	N	N	N	N	25/07/2014	N	NA	NA	NA	NA
13.2.18	650639	656468	13	2	18	9999	NA	N	N	N	N	25/07/2014	N	NA	NA	NA	NA
13.2.19	650640	656454	13	2	19	9999	NA	N	N	N	N	25/07/2014	N	NA	NA	NA	NA
13.2.2	650651	656700	13	2	2	9999	NA	N	N	N	N	25/07/2014	N	NA	NA	NA	NA
13.2.20	650642	656440	13	2	20	9999	NA	N	N	N	N	25/07/2014	N	NA	NA	NA	NA
13.2.21	650645	656426	13	2	21	9999	NA	N	N	N	N	25/07/2014	N	NA	NA	NA	NA
13.2.22	650647	656412	13	2	22	9999	NA	N	N	N	N	25/07/2014	N	NA	NA	NA	NA
13.2.23	650649	656398	13	2	23	9999	NA	N	N	N	N	25/07/2014	N	NA	NA	NA	NA
13.2.24	650651	656384	13	2	24	9999	NA	N	N	N	N	25/07/2014	N	NA	NA	NA	NA
13.2.25	650654	656370	13	2	25	9999	NA	N	N	N	N	25/07/2014	N	NA	NA	NA	NA
13.2.26	650656	656356	13	2	26	9999	NA	N	N	N	N	25/07/2014	N	NA	NA	NA	NA
13.2.27	650658	656342	13	2	27	9999	NA	N	N	N	N	25/07/2014	N	NA	NA	NA	NA
13.2.28	650660	656328	13	2	28	9999	NA	N	N	N	N	25/07/2014	N	NA	NA	NA	NA
13.2.29	650662	656314	13	2	29	9999	NA	N	N	N	N	25/07/2014	N	NA	NA	NA	NA
13.2.3	650651	656686	13	2	3	9999	NA	N	N	N	N	25/07/2014	N	NA	NA	NA	NA
13.2.30	650665	656300	13	2	30	9999	NA	N	N	N	N	25/07/2014	N	NA	NA	NA	NA
13.2.31	650660	656293	13	2	31	9999	NA	N	N	N	N	25/07/2014	N	NA	NA	NA	NA
13.2.32	650652	656289	13	2	32	9999	NA	N	N	N	N	25/07/2014	N	NA	NA	NA	NA
13.2.33	650643	656285	13	2	33	9999	NA	N	N	N	N	25/07/2014	N	NA	NA	NA	NA
13.2.34	650635	656281	13	2	34	9999	NA	N	N	N	N	25/07/2014	N	NA	NA	NA	NA
13.2.35	650627	656280	13	2	35	9999	NA	N	N	N	N	25/07/2014	N	NA	NA	NA	NA
13.2.36	650618	656280	13	2	36	9999	NA	N	N	N	N	25/07/2014	N	NA	NA	NA	NA
13.2.37	650609	656281	13	2	37	9999	NA	N	N	N	N	25/07/2014	N	NA	NA	NA	NA
13.2.38	650601	656282	13	2	38	9999	NA	N	N	N	N	25/07/2014	N	NA	NA	NA	NA
13.2.39	650592	656283	13	2	39	9999	NA	N	N	N	N	25/07/2014	N	NA	NA	NA	NA
13.2.4	650650	656671	13	2	4	9999	NA	N	N	N	N	25/07/2014	N	NA	NA	NA	NA
13.2.40	650584	656284	13	2	40	9999	NA	N	N	N	N	25/07/2014	N	NA	NA	NA	NA
13.2.41	650575	656285	13	2	41	9999	NA	N	N	N	N	25/07/2014	N	NA	NA	NA	NA
13.2.42	650567	656286	13	2	42	9999	NA	N	N	N	N	25/07/2014	N	NA	NA	NA	NA
13.2.43	650558	656287	13	2	43	9999	NA	N	N	N	N	25/07/2014	N	NA	NA	NA	NA
13.2.44	650549	656288	13	2	44	9999	NA	N	N	N	N	25/07/2014	N	NA	NA	NA	NA
13.2.45	650541	656289	13	2	45	9999	NA	N	N	N	N	25/07/2014	N	NA	NA	NA	NA
13.2.46	650532	656290	13	2	46	9999	NA	N	N	N	N	25/07/2014	N	NA	NA	NA	NA
13.2.47	650524	656291	13	2	47	9999	NA	N	N	N	N	25/07/2014	N	NA	NA	NA	NA
13.2.48	650524	656291	13	2	48	9999	NA	N	N	N	N	25/07/2014	N	NA	NA	NA	NA
13.2.5	650649	656657	13	2	5	9999	NA	N	N	N	N	25/07/2014	N	NA	NA	NA	NA
13.2.6	650648	656642	13	2	6	9999	NA	N	N	N	N	25/07/2014	N	NA	NA	NA	NA
13.2.7	650647	656628	13	2	7	9999	NA	N	N	N	N	25/07/2014	N	NA	NA	NA	NA
13.2.8	650647	656613	13	2	8	9999	NA	N	N	N	N	25/07/2014	N	NA	NA	NA	NA
13.2.9	650646	656598	13	2	9	9999	NA	N	N	N	N	25/07/2014	N	NA	NA	NA	NA
13.3.1	650719	656487	13	3	1	9999	NA	N	N	N	N	25/07/2014	N	NA	NA	NA	NA
13.3.10	650739	656374	13	3	10	9999	NA	N	N	N	N	25/07/2014	N	NA	NA	NA	NA
13.3.11	650741	656362	13	3	11	9999	NA	N	N	N	N	25/07/2014	N	NA	NA	NA	NA
13.3.12	650744	656349	13	3	12	9999	NA	N	N	N	N	25/07/2014	N	NA	NA	NA	NA
13.3.13	650746	656337	13	3	13	9999	NA	N	N	N	N	25/07/2014	N	NA	NA	NA	NA
13.3.14	650748	656324	13	3	14	9999	NA	N	N	N	N	25/07/2014	N	NA	NA	NA	NA
13.3.15	650750	656312	13	3	15	9999	NA	N	N	N	N	25/07/2014	N	NA	NA	NA	NA
13.3.16	650753	656300	13	3	16	9999	NA	N	N	N	N	25/07/2014	N	NA	NA	NA	NA
13.3.17	650755	656287	13	3	17	9999	NA	N	N	N	N	25/07/2014	N	NA	NA	NA	NA
13.3.18	650749	656279	13	3	18	9999	NA	N	N	N	N	25/07/2014	N	NA	NA	NA	NA
13.3.19	650743	656271	13	3	19	9999	NA	N	N	N	N	25/07/2014	N	NA	NA	NA	NA
13.3.2	650721	656474	13	3	2	9999	NA	N	N	N	N	25/07/2014	N	NA	NA	NA	NA
13.3.20	650737	656264	13	3	20	9999	NA	N	N	N	N	25/07/2014	N	NA	NA	NA	NA
13.3.21	650730	656256	13	3	21	9999	NA	N	N	N	N	25/07/2014	N	NA	NA	NA	NA
13.3.22	650724	656249	13	3	22	9999	NA	N	N	N	N	25/07/2014	N	NA	NA	NA	NA
13.3.23	650717	656241	13	3	23	9999	NA	N	N	N	N	25/07/2014	N	NA	NA	NA	NA
13.3.24	650711	656233	13	3	24	9999	NA	N	N	N	N	25/07/2014	N	NA	NA	NA	NA
13.3.25	650704	656226	13	3	25	9999	NA	N	N	N	N	25/07/2014	N	NA	NA	NA	NA
13.3.26	650698	656218	13	3	26	9999	NA	N	N	N	N	25/07/2014	N	NA	NA	NA	NA
13.3.27	650692	656210	13	3	27	9999	NA	N	N	N	N	25/07/2014	N	NA	NA	NA	NA
13.3.28	650686	656200	13	3	28	9999	NA	N	N	N	N	25/07/2014	N	NA	NA	NA	NA
13.3.29	650681	656190	13	3	29	9999	NA	N	N	N	N	25/07/2014	N	NA	NA	NA	NA
13.3.3	650724	656462	13	3	3	9999	NA	N	N	N	N	25/07/2014	N	NA	NA	NA	NA
13.3.30	650676	656180	13	3	30	9999	NA	N	N	N	N	25/07/2014	N	NA	NA	NA	NA
13.3.31	650671	656170	13	3	31	9999	NA	N	N	N	N	25/07/2014	N	NA	NA	NA	NA
13.3.32	650666	656160	13	3	32	9999	NA	N	N	N	N	25/07/2014	N	NA	NA	NA	NA
13.3.33	650660	656150	13	3	33	9999	NA	N	N	N	N	25/07/2014	N	NA	NA	NA	NA
13.3.34	650655	656140	13	3	34	9999	NA	N	N	N	N	25/07/2014	N	NA	NA	NA	NA
13.3.35	650650	656130	13	3	35	9999	NA	N	N	N	N	25/07/2014	N	NA	NA	NA	NA
13.3.36	650645	656121	13	3	36	9999	NA	N	N	N	N	25/07/2014	N	NA	NA	NA	NA
13.3.37	650640	656111	13	3	37	9999	NA	N	N	N	N	25/07/2014	N	NA	NA	NA	NA
13.3.38	650634	656101	13	3	38	9999	NA	N	N	N	N	25/07/2014	N	NA	NA	NA	NA
13.3.39	650629	656091	13	3	39	9999	NA	N	N	N	N	25/07/2014	N	NA	NA	NA	NA
13.3.4	650726	656449	13	3	4	9999	NA	N	N	N	N	25/07/2014	N	NA	NA	NA	NA
13.3.40	650624	656081	13	3	40	9999	NA	N	N	N	N	25/07/2014	N	NA	NA	NA	NA
13.3.41	650619	656071	13	3	41	9999	NA	N	N	N	N	25/07/2014	N	NA	NA	NA	NA
13.3.42	650613	656061	13	3	42	9999	NA	N	N	N	N	25/07/2014	N	NA	NA	NA	NA
13.3.43	650608	656051	13	3	43	9999	NA	N	N	N	N	25/07/2014	N	NA	NA	NA	NA
13.3.44	650603	656041	13	3	44	9999	NA	N	N	N	N	25/07/2014	N	NA	NA	NA	NA
13.3.45	650598	656031	13	3	45	9999	NA	N	N	N	N	25/07/2014	N	NA	NA	NA	NA
13.3.46	650593	656021	13	3	46	9999	NA	N	N	N	N	25/07/2014	N	NA	NA	NA	NA
13.3.47	650587	656011	13	3	47	9999	NA	N	N	N	N	25/07/2014	N	NA	NA	NA	NA
13.3.48	650587	656011	13	3	48	F	26.4	N	N	N	N	25/07/2014	N	NA	NA	NA	NA
13.3.5	650728	656437	13	3	5	9999	NA	N	N	N	N	25/07/2014	N	NA	NA	NA	NA
13.3.6	650730	656424	13	3	6	9999	NA	N	N	N	N	25/07/2014	N	NA	NA	NA	NA
13.3.7	650733	656412	13	3	7	9999	NA	N	N	N	N	25/07/2014	N	NA	NA	NA	NA
13.3.8	650735	656399	13	3	8	9999	NA	N	N	N	N	25/07/2014	N	NA	NA	NA	NA
13.3.9	650737	656387	13	3	9	9999	NA	N	N	N	N	25/07/2014	N	NA	NA	NA	NA
13.4.1	650365	656250	13	4	1	9999	NA	N	N	N	N	25/07/2014	N	NA	NA	NA	NA
13.4.10	650459	656226	13	4	10	9999	NA	N	N	N	N	25/07/2014	N	NA	NA	NA	NA
13.4.11	650469	656223	13	4	11	F	30.1	N	N	N	N	25/07/2014	N	NA	NA	NA	NA
13.4.11	650469	656223	13	4	11	F	37.8	N	N	N	N	25/07/2014	N	NA	NA	NA	NA
13.4.12	650480	656220	13	4	12	9999	NA	N	N	N	N	25/07/2014	N	NA	NA	NA	NA
13.4.13	650490	656217	13	4	13	9999	NA	N	N	N	N	25/07/2014	N	NA	NA	NA	NA
13.4.14	650501	656215	13	4	14	9999	NA	N	N	N	N	25/07/2014	N	NA	NA	NA	NA
13.4.15	650511	656212	13	4	15	F	31.4	N	N	N	N	25/07/2014	N	NA	NA	NA	NA
13.4.16	650522	656209	13	4	16	9999	NA	N	N	N	N	25/07/2014	N	NA	NA	NA	NA
13.4.17	650532	656207	13	4	17	F	31.6	N	N	N	N	25/07/2014	N	NA	NA	NA	NA
13.4.17	650532	656207	13	4	17	F	34.8	N	N	N	N	25/07/2014	N	NA	NA	NA	NA
13.4.17	650532	656207	13	4	17	M	39.3	N	Y	N	N	25/07/2014	N	NA	NA	NA	NA
13.4.18	650543	656204	13	4	18	F	30.4	N	N	N	N	25/07/2014	N	NA	NA	NA	NA
13.4.18	650543	656204	13	4	18	M	28.9	N	N	N	N	25/07/2014	N	NA	NA	NA	NA
13.4.18	650543	656204	13	4	18	M	36.4	N	N	N	N	25/07/2014	N	NA	NA	NA	NA
13.4.19	650553	656201	13	4	19	9999	NA	N	N	N	N	25/07/2014	N	NA	NA	NA	NA
13.4.2	650375	656247	13	4	2	9999	NA	N	N	N	N	25/07/2014	N	NA	NA	NA	NA
13.4.20	650564	656198	13	4	20	F	37.4	N	N	N	N	25/07/2014	N	NA	NA	NA	NA
13.4.21	650574	656196	13	4	21	F	37.7	N	N	N	N	25/07/2014	N	NA	NA	NA	NA
13.4.22	650585	656193	13	4	22	M	39.8	N	Y	N	N	25/07/2014	N	NA	NA	NA	NA
13.4.23	650593	656187	13	4	23	9999	NA	N	N	N	N	25/07/2014	N	NA	NA	NA	NA
13.4.24	650594	656169	13	4	24	M	32.7	N	N	N	N	25/07/2014	N	NA	NA	NA	NA
13.4.24	650594	656169	13	4	24	M	35.2	N	N	N	N	25/07/2014	N	NA	NA	NA	NA
13.4.25	650589	656158	13	4	25	9999	NA	N	N	N	N	25/07/2014	N	NA	NA	NA	NA
13.4.26	650579	656154	13	4	26	M	32.9	N	N	N	N	25/07/2014	N	NA	NA	NA	NA
13.4.26	650579	656154	13	4	26	M	36	N	N	N	N	25/07/2014	N	NA	NA	NA	NA
13.4.27	650569	656150	13	4	27	F	37	N	N	N	N	25/07/2014	N	NA	NA	NA	NA
13.4.27	650569	656150	13	4	27	F	40.3	N	N	N	N	25/07/2014	N	NA	NA	NA	NA
13.4.27	650569	656150	13	4	27	M	33.8	N	N	N	N	25/07/2014	N	NA	NA	NA	NA
13.4.27	650569	656150	13	4	27	M	34.4	N	N	N	N	25/07/2014	N	NA	NA	NA	NA
13.4.27	650569	656150	13	4	27	M	35.8	N	N	N	N	25/07/2014	N	NA	NA	NA	NA
13.4.28	650558	656151	13	4	28	M	31.8	N	N	N	N	25/07/2014	N	NA	NA	NA	NA
13.4.28	650558	656151	13	4	28	M	35.8	N	N	N	N	25/07/2014	N	NA	NA	NA	NA
13.4.29	650548	656155	13	4	29	9999	NA	N	N	N	N	25/07/2014	N	NA	NA	NA	NA
13.4.3	650386	656245	13	4	3	9999	NA	N	N	N	N	25/07/2014	N	NA	NA	NA	NA
13.4.30	650537	656158	13	4	30	9999	NA	N	N	N	N	25/07/2014	N	NA	NA	NA	NA
13.4.31	650527	656162	13	4	31	9999	NA	N	N	N	N	25/07/2014	N	NA	NA	NA	NA
13.4.32	650517	656166	13	4	32	M	33.8	N	N	N	N	25/07/2014	N	NA	NA	NA	NA
13.4.33	650506	656169	13	4	33	F	33	N	N	N	N	25/07/2014	Y	372	32.2	0.8	271
13.4.33	650506	656169	13	4	33	F	33.5	N	N	N	N	25/07/2014	N	NA	NA	NA	NA
13.4.33	650506	656169	13	4	33	F	39.5	N	N	N	N	25/07/2014	N	NA	NA	NA	NA
13.4.34	650496	656173	13	4	34	F	31.2	N	N	N	N	25/07/2014	N	NA	NA	NA	NA
13.4.34	650496	656173	13	4	34	F	32.6	N	N	N	N	25/07/2014	N	NA	NA	NA	NA
13.4.34	650496	656173	13	4	34	F	37.8	N	N	N	N	25/07/2014	N	NA	NA	NA	NA
13.4.34	650496	656173	13	4	34	M	34.1	N	N	N	N	25/07/2014	N	NA	NA	NA	NA
13.4.35	650486	656176	13	4	35	9999	NA	N	N	N	N	25/07/2014	N	NA	NA	NA	NA
13.4.36	650475	656180	13	4	36	9999	NA	N	N	N	N	25/07/2014	N	NA	NA	NA	NA
13.4.37	650465	656183	13	4	37	9999	NA	N	N	N	N	25/07/2014	N	NA	NA	NA	NA
13.4.38	650455	656187	13	4	38	M	35.5	N	Y	N	N	25/07/2014	N	NA	NA	NA	NA
13.4.39	650444	656191	13	4	39	9999	NA	N	N	N	N	25/07/2014	N	NA	NA	NA	NA
13.4.4	650396	656242	13	4	4	9999	NA	N	N	N	N	25/07/2014	N	NA	NA	NA	NA
13.4.40	650434	656194	13	4	40	M	36.7	N	N	N	N	25/07/2014	N	NA	NA	NA	NA
13.4.41	650424	656198	13	4	41	F	37.2	N	N	N	N	25/07/2014	N	NA	NA	NA	NA
13.4.42	650413	656201	13	4	42	F	30.7	N	N	N	N	25/07/2014	N	NA	NA	NA	NA
13.4.43	650403	656205	13	4	43	F	31.8	N	N	N	N	25/07/2014	N	NA	NA	NA	NA
13.4.43	650403	656205	13	4	43	F	39	N	N	N	N	25/07/2014	N	NA	NA	NA	NA
13.4.44	650392	656208	13	4	44	F	32.5	N	N	N	N	25/07/2014	N	NA	NA	NA	NA
13.4.45	650382	656212	13	4	45	F	33.5	N	N	N	N	25/07/2014	N	NA	NA	NA	NA
13.4.45	650382	656212	13	4	45	M	28.8	N	N	N	N	25/07/2014	N	NA	NA	NA	NA
13.4.45	650382	656212	13	4	45	M	36.9	N	N	N	N	25/07/2014	N	NA	NA	NA	NA
13.4.46	650372	656215	13	4	46	F	38.6	N	N	N	N	25/07/2014	N	NA	NA	NA	NA
13.4.47	650361	656219	13	4	47	9999	NA	N	N	N	N	25/07/2014	N	NA	NA	NA	NA
13.4.48	650351	656223	13	4	48	F	35.8	N	N	N	N	25/07/2014	N	NA	NA	NA	NA
13.4.48	650351	656223	13	4	48	F	36.9	N	N	N	N	25/07/2014	N	NA	NA	NA	NA
13.4.5	650407	656239	13	4	5	9999	NA	N	N	N	N	25/07/2014	N	NA	NA	NA	NA
13.4.6	650417	656236	13	4	6	9999	NA	N	N	N	N	25/07/2014	N	NA	NA	NA	NA
13.4.7	650428	656234	13	4	7	9999	NA	N	N	N	N	25/07/2014	N	NA	NA	NA	NA
13.4.8	650438	656231	13	4	8	9999	NA	N	N	N	N	25/07/2014	N	NA	NA	NA	NA
13.4.9	650449	656228	13	4	9	M	35.5	N	N	N	N	25/07/2014	N	NA	NA	NA	NA
13.4.9	650449	656228	13	4	9	M	35.5	N	N	N	N	25/07/2014	N	NA	NA	NA	NA
13.5.1	650347	656187	13	5	1	9999	NA	N	N	N	N	25/07/2014	N	NA	NA	NA	NA
13.5.10	650443	656157	13	5	10	F	38.3	N	N	N	N	25/07/2014	N	NA	NA	NA	NA
13.5.11	650454	656153	13	5	11	F	33.8	N	N	N	N	25/07/2014	N	NA	NA	NA	NA
13.5.11	650454	656153	13	5	11	F	36.8	N	N	N	N	25/07/2014	N	NA	NA	NA	NA
13.5.11	650454	656153	13	5	11	F	38.5	N	N	N	N	25/07/2014	N	NA	NA	NA	NA
13.5.12	650464	656150	13	5	12	F	33	N	N	N	N	25/07/2014	N	NA	NA	NA	NA
13.5.12	650464	656150	13	5	12	F	36	N	N	N	N	25/07/2014	N	NA	NA	NA	NA
13.5.13	650475	656146	13	5	13	F	30.2	N	N	N	N	25/07/2014	Y	401	29.3	0.9	247
13.5.13	650475	656146	13	5	13	F	36.4	N	Y	N	N	25/07/2014	N	NA	NA	NA	NA
13.5.13	650475	656146	13	5	13	F	38	N	Y	N	N	25/07/2014	N	NA	NA	NA	NA
13.5.13	650475	656146	13	5	13	F	39.4	N	N	N	N	25/07/2014	N	NA	NA	NA	NA
13.5.13	650475	656146	13	5	13	M	32.1	N	N	N	N	25/07/2014	N	NA	NA	NA	NA
13.5.13	650475	656146	13	5	13	M	37.7	N	N	N	N	25/07/2014	N	NA	NA	NA	NA
13.5.14	650486	656143	13	5	14	9999	NA	N	N	N	N	25/07/2014	N	NA	NA	NA	NA
13.5.15	650496	656140	13	5	15	F	33.5	N	N	N	N	25/07/2014	N	NA	NA	NA	NA
13.5.15	650496	656140	13	5	15	F	34	N	N	N	N	25/07/2014	N	NA	NA	NA	NA
13.5.15	650496	656140	13	5	15	F	35.5	N	N	N	N	25/07/2014	N	NA	NA	NA	NA
13.5.15	650496	656140	13	5	15	F	37.4	N	Y	N	N	25/07/2014	N	NA	NA	NA	NA
13.5.15	650496	656140	13	5	15	F	38.1	N	N	N	N	25/07/2014	N	NA	NA	NA	NA
13.5.15	650496	656140	13	5	15	F	39.6	N	N	N	N	25/07/2014	Y	372	39	0.6	269
13.5.15	650496	656140	13	5	15	M	31.3	N	N	N	N	25/07/2014	N	NA	NA	NA	NA
13.5.15	650496	656140	13	5	15	M	32.6	N	N	N	N	25/07/2014	N	NA	NA	NA	NA
13.5.16	650507	656136	13	5	16	F	34.8	N	N	N	N	25/07/2014	N	NA	NA	NA	NA
13.5.16	650507	656136	13	5	16	F	35.1	N	N	N	N	25/07/2014	N	NA	NA	NA	NA
13.5.16	650507	656136	13	5	16	F	35.2	N	N	N	N	25/07/2014	N	NA	NA	NA	NA
13.5.16	650507	656136	13	5	16	F	38	N	N	N	N	25/07/2014	N	NA	NA	NA	NA
13.5.16	650507	656136	13	5	16	F	38.1	N	N	N	N	25/07/2014	N	NA	NA	NA	NA
13.5.16	650507	656136	13	5	16	F	42.5	N	N	N	N	25/07/2014	N	NA	NA	NA	NA
13.5.17	650518	656133	13	5	17	9999	NA	N	N	N	N	25/07/2014	N	NA	NA	NA	NA
13.5.18	650528	656129	13	5	18	9999	NA	N	N	N	N	25/07/2014	N	NA	NA	NA	NA
13.5.19	650539	656126	13	5	19	9999	NA	N	N	N	N	25/07/2014	N	NA	NA	NA	NA
13.5.2	650358	656184	13	5	2	9999	NA	N	N	N	N	25/07/2014	N	NA	NA	NA	NA
13.5.20	650550	656123	13	5	20	9999	NA	N	N	N	N	25/07/2014	N	NA	NA	NA	NA
13.5.21	650560	656119	13	5	21	9999	NA	N	N	N	N	25/07/2014	N	NA	NA	NA	NA
13.5.22	650571	656116	13	5	22	9999	NA	N	N	N	N	25/07/2014	N	NA	NA	NA	NA
13.5.23	650576	656100	13	5	23	M	33.9	N	N	N	N	25/07/2014	N	NA	NA	NA	NA
13.5.24	650575	656088	13	5	24	9999	NA	N	N	N	N	25/07/2014	N	NA	NA	NA	NA
13.5.25	650564	656084	13	5	25	F	31.6	N	N	N	N	25/07/2014	N	NA	NA	NA	NA
13.5.25	650564	656084	13	5	25	F	42.1	N	N	N	N	25/07/2014	N	NA	NA	NA	NA
13.5.25	650564	656084	13	5	25	M	31.4	N	N	N	N	25/07/2014	N	NA	NA	NA	NA
13.5.26	650553	656081	13	5	26	9999	NA	N	N	N	N	25/07/2014	N	NA	NA	NA	NA
13.5.27	650543	656084	13	5	27	F	43.9	N	N	N	N	25/07/2014	N	NA	NA	NA	NA
13.5.27	650543	656084	13	5	27	F	45.7	N	N	N	N	25/07/2014	N	NA	NA	NA	NA
13.5.27	650543	656084	13	5	27	M	37.3	N	N	N	N	25/07/2014	N	NA	NA	NA	NA
13.5.28	650532	656087	13	5	28	F	36.5	N	N	N	N	25/07/2014	N	NA	NA	NA	NA
13.5.29	650521	656090	13	5	29	F	30.9	N	N	N	N	25/07/2014	N	NA	NA	NA	NA
13.5.29	650521	656090	13	5	29	M	37.5	N	N	N	N	25/07/2014	N	NA	NA	NA	NA
13.5.3	650368	656181	13	5	3	9999	NA	N	N	N	N	25/07/2014	N	NA	NA	NA	NA
13.5.30	650510	656093	13	5	30	F	38.2	N	N	N	N	25/07/2014	N	NA	NA	NA	NA
13.5.30	650510	656093	13	5	30	M	39.6	N	N	N	N	25/07/2014	N	NA	NA	NA	NA
13.5.31	650500	656096	13	5	31	F	35.4	N	N	N	N	25/07/2014	N	NA	NA	NA	NA
13.5.31	650500	656096	13	5	31	F	40.1	N	N	N	N	25/07/2014	N	NA	NA	NA	NA
13.5.32	650489	656099	13	5	32	9999	NA	N	N	N	N	25/07/2014	N	NA	NA	NA	NA
13.5.33	650478	656103	13	5	33	F	38.6	N	N	N	N	25/07/2014	N	NA	NA	NA	NA
13.5.33	650478	656103	13	5	33	F	41	N	N	N	N	25/07/2014	N	NA	NA	NA	NA
13.5.34	650468	656106	13	5	34	F	31.8	N	N	N	N	25/07/2014	N	NA	NA	NA	NA
13.5.34	650468	656106	13	5	34	M	35.4	N	N	N	N	25/07/2014	N	NA	NA	NA	NA
13.5.35	650457	656109	13	5	35	9999	NA	N	N	N	N	25/07/2014	N	NA	NA	NA	NA
13.5.36	650446	656112	13	5	36	9999	NA	N	N	N	N	25/07/2014	N	NA	NA	NA	NA
13.5.37	650435	656115	13	5	37	9999	NA	N	N	N	N	25/07/2014	N	NA	NA	NA	NA
13.5.38	650425	656118	13	5	38	9999	NA	N	N	N	N	25/07/2014	N	NA	NA	NA	NA
13.5.39	650414	656121	13	5	39	9999	NA	N	N	N	N	25/07/2014	N	NA	NA	NA	NA
13.5.4	650379	656177	13	5	4	9999	NA	N	N	N	N	25/07/2014	N	NA	NA	NA	NA
13.5.40	650403	656124	13	5	40	9999	NA	N	N	N	N	25/07/2014	N	NA	NA	NA	NA
13.5.41	650393	656127	13	5	41	9999	NA	N	N	N	N	25/07/2014	N	NA	NA	NA	NA
13.5.42	650382	656130	13	5	42	9999	NA	N	N	N	N	25/07/2014	N	NA	NA	NA	NA
13.5.43	650371	656133	13	5	43	9999	NA	N	N	N	N	25/07/2014	N	NA	NA	NA	NA
13.5.44	650361	656136	13	5	44	9999	NA	N	N	N	N	25/07/2014	N	NA	NA	NA	NA
13.5.45	650350	656139	13	5	45	9999	NA	N	N	N	N	25/07/2014	N	NA	NA	NA	NA
13.5.46	650339	656142	13	5	46	9999	NA	N	N	N	N	25/07/2014	N	NA	NA	NA	NA
13.5.47	650328	656145	13	5	47	F	46.7	N	N	N	N	25/07/2014	N	NA	NA	NA	NA
13.5.48	650328	656145	13	5	48	9999	NA	N	N	N	N	25/07/2014	N	NA	NA	NA	NA
13.5.5	650390	656174	13	5	5	F	32.3	N	N	N	N	25/07/2014	N	NA	NA	NA	NA
13.5.5	650390	656174	13	5	5	F	32.5	N	N	N	N	25/07/2014	N	NA	NA	NA	NA
13.5.5	650390	656174	13	5	5	F	36.4	N	N	N	N	25/07/2014	N	NA	NA	NA	NA
13.5.5	650390	656174	13	5	5	M	36.2	N	N	N	N	25/07/2014	N	NA	NA	NA	NA
13.5.6	650400	656170	13	5	6	F	35.7	N	N	N	N	25/07/2014	N	NA	NA	NA	NA
13.5.6	650400	656170	13	5	6	M	36	N	N	N	N	25/07/2014	N	NA	NA	NA	NA
13.5.7	650411	656167	13	5	7	F	36.6	N	Y	N	N	25/07/2014	N	NA	NA	NA	NA
13.5.7	650411	656167	13	5	7	F	37.8	N	Y	N	N	25/07/2014	N	NA	NA	NA	NA
13.5.8	650422	656164	13	5	8	M	34.4	N	N	N	N	25/07/2014	N	NA	NA	NA	NA
13.5.9	650432	656160	13	5	9	F	33.3	N	N	N	N	25/07/2014	N	NA	NA	NA	NA
13.6.1	650330	656117	13	6	1	9999	NA	N	N	N	N	25/07/2014	N	NA	NA	NA	NA
13.6.10	650426	656083	13	6	10	9999	NA	N	N	N	N	25/07/2014	N	NA	NA	NA	NA
13.6.11	650437	656079	13	6	11	9999	NA	N	N	N	N	25/07/2014	N	NA	NA	NA	NA
13.6.12	650448	656075	13	6	12	F	36.2	N	N	N	N	25/07/2014	N	NA	NA	NA	NA
13.6.12	650448	656075	13	6	12	M	32.1	N	N	N	N	25/07/2014	N	NA	NA	NA	NA
13.6.13	650458	656071	13	6	13	9999	NA	N	N	N	N	25/07/2014	N	NA	NA	NA	NA
13.6.14	650469	656067	13	6	14	F	38	N	N	N	N	25/07/2014	N	NA	NA	NA	NA
13.6.15	650480	656063	13	6	15	F	46.9	N	N	N	N	25/07/2014	N	NA	NA	NA	NA
13.6.16	650490	656060	13	6	16	F	36.9	N	N	N	N	25/07/2014	N	NA	NA	NA	NA
13.6.16	650490	656060	13	6	16	M	32	N	N	N	N	25/07/2014	N	NA	NA	NA	NA
13.6.16	650490	656060	13	6	16	M	40.1	N	N	N	N	25/07/2014	N	NA	NA	NA	NA
13.6.17	650501	656056	13	6	17	F	30.8	N	N	N	N	25/07/2014	N	NA	NA	NA	NA
13.6.18	650512	656052	13	6	18	9999	NA	N	N	N	N	25/07/2014	N	NA	NA	NA	NA
13.6.19	650522	656048	13	6	19	F	37.2	N	N	N	N	25/07/2014	N	NA	NA	NA	NA
13.6.19	650522	656048	13	6	19	F	50.3	N	Y	N	N	25/07/2014	N	NA	NA	NA	NA
13.6.2	650341	656113	13	6	2	F	45.1	N	N	N	N	25/07/2014	N	NA	NA	NA	NA
13.6.20	650533	656044	13	6	20	F	40.3	N	N	N	N	25/07/2014	N	NA	NA	NA	NA
13.6.20	650533	656044	13	6	20	F	42.6	N	N	N	N	25/07/2014	N	NA	NA	NA	NA
13.6.21	650544	656040	13	6	21	F	37.8	N	N	N	N	25/07/2014	Y	415	36.5	1.3	355
13.6.21	650544	656040	13	6	21	F	41	N	N	N	N	25/07/2014	N	NA	NA	NA	NA
13.6.22	650555	656036	13	6	22	M	40.9	N	N	N	N	25/07/2014	N	NA	NA	NA	NA
13.6.23	650560	656021	13	6	23	9999	NA	N	N	N	N	25/07/2014	N	NA	NA	NA	NA
13.6.24	650554	656014	13	6	24	9999	NA	N	N	N	N	25/07/2014	N	NA	NA	NA	NA
13.6.25	650543	656011	13	6	25	9999	NA	N	N	N	N	25/07/2014	N	NA	NA	NA	NA
13.6.26	650532	656009	13	6	26	9999	NA	N	N	N	N	25/07/2014	N	NA	NA	NA	NA
13.6.27	650522	656012	13	6	27	9999	NA	N	N	N	N	25/07/2014	N	NA	NA	NA	NA
13.6.28	650511	656016	13	6	28	M	51.9	N	N	N	N	25/07/2014	N	NA	NA	NA	NA
13.6.29	650500	656020	13	6	29	F	37.8	N	N	N	N	25/07/2014	N	NA	NA	NA	NA
13.6.3	650351	656110	13	6	3	9999	NA	N	N	N	N	25/07/2014	N	NA	NA	NA	NA
13.6.30	650489	656023	13	6	30	9999	NA	N	N	N	N	25/07/2014	N	NA	NA	NA	NA
13.6.31	650479	656027	13	6	31	9999	NA	N	N	N	N	25/07/2014	N	NA	NA	NA	NA
13.6.32	650468	656031	13	6	32	9999	NA	N	N	N	N	25/07/2014	N	NA	NA	NA	NA
13.6.33	650457	656035	13	6	33	M	32.3	N	N	N	N	25/07/2014	N	NA	NA	NA	NA
13.6.34	650447	656038	13	6	34	F	37.6	N	N	N	N	25/07/2014	N	NA	NA	NA	NA
13.6.34	650447	656038	13	6	34	M	36.6	N	N	N	N	25/07/2014	N	NA	NA	NA	NA
13.6.35	650436	656042	13	6	35	F	39.1	N	N	N	N	25/07/2014	N	NA	NA	NA	NA
13.6.36	650425	656046	13	6	36	9999	NA	N	N	N	N	25/07/2014	N	NA	NA	NA	NA
13.6.37	650414	656049	13	6	37	9999	NA	N	N	N	N	25/07/2014	N	NA	NA	NA	NA
13.6.38	650404	656053	13	6	38	9999	NA	N	N	N	N	25/07/2014	N	NA	NA	NA	NA
13.6.39	650393	656057	13	6	39	9999	NA	N	N	N	N	25/07/2014	N	NA	NA	NA	NA
13.6.4	650362	656106	13	6	4	9999	NA	N	N	N	N	25/07/2014	N	NA	NA	NA	NA
13.6.40	650382	656060	13	6	40	9999	NA	N	N	N	N	25/07/2014	N	NA	NA	NA	NA
13.6.41	650372	656064	13	6	41	9999	NA	N	N	N	N	25/07/2014	N	NA	NA	NA	NA
13.6.42	650361	656068	13	6	42	9999	NA	N	N	N	N	25/07/2014	N	NA	NA	NA	NA
13.6.43	650350	656071	13	6	43	9999	NA	N	N	N	N	25/07/2014	N	NA	NA	NA	NA
13.6.44	650339	656075	13	6	44	9999	NA	N	N	N	N	25/07/2014	N	NA	NA	NA	NA
13.6.45	650329	656079	13	6	45	9999	NA	N	N	N	N	25/07/2014	N	NA	NA	NA	NA
13.6.46	650318	656083	13	6	46	9999	NA	N	N	N	N	25/07/2014	N	NA	NA	NA	NA
13.6.47	650307	656086	13	6	47	9999	NA	N	N	N	N	25/07/2014	N	NA	NA	NA	NA
13.6.48	650307	656086	13	6	48	9999	NA	N	N	N	N	25/07/2014	N	NA	NA	NA	NA
13.6.5	650373	656102	13	6	5	9999	NA	N	N	N	N	25/07/2014	N	NA	NA	NA	NA
13.6.6	650383	656098	13	6	6	M	38.5	N	Y	N	N	25/07/2014	N	NA	NA	NA	NA
13.6.7	650394	656094	13	6	7	9999	NA	N	N	N	N	25/07/2014	N	NA	NA	NA	NA
13.6.8	650405	656090	13	6	8	9999	NA	N	N	N	N	25/07/2014	N	NA	NA	NA	NA
13.6.9	650415	656087	13	6	9	F	34.8	N	N	N	N	25/07/2014	N	NA	NA	NA	NA
13.6.9	650415	656087	13	6	9	F	44.1	N	N	N	N	25/07/2014	N	NA	NA	NA	NA
14.1.1	650026	656577	14	1	1	9999	NA	N	N	N	N	01/09/2014	N	NA	NA	NA	NA
14.1.10	650141	656566	14	1	10	9999	NA	N	N	N	N	01/09/2014	N	NA	NA	NA	NA
14.1.11	650154	656565	14	1	11	9999	NA	N	N	N	N	01/09/2014	N	NA	NA	NA	NA
14.1.12	650167	656563	14	1	12	9999	NA	N	N	N	N	01/09/2014	N	NA	NA	NA	NA
14.1.13	650180	656562	14	1	13	9999	NA	N	N	N	N	01/09/2014	N	NA	NA	NA	NA
14.1.14	650192	656561	14	1	14	9999	NA	N	N	N	N	01/09/2014	N	NA	NA	NA	NA
14.1.15	650205	656560	14	1	15	9999	NA	N	N	N	N	01/09/2014	N	NA	NA	NA	NA
14.1.16	650218	656558	14	1	16	9999	NA	N	N	N	N	01/09/2014	N	NA	NA	NA	NA
14.1.17	650233	656557	14	1	17	9999	NA	N	N	N	N	01/09/2014	N	NA	NA	NA	NA
14.1.18	650247	656556	14	1	18	M	49.1	N	N	N	N	01/09/2014	N	NA	NA	NA	NA
14.1.19	650260	656555	14	1	19	9999	NA	N	N	N	N	01/09/2014	N	NA	NA	NA	NA
14.1.2	650039	656576	14	1	2	9999	NA	N	N	N	N	01/09/2014	N	NA	NA	NA	NA
14.1.20	650275	656553	14	1	20	9999	NA	N	N	N	N	01/09/2014	N	NA	NA	NA	NA
14.1.21	650282	656544	14	1	21	9999	NA	N	N	N	N	01/09/2014	N	NA	NA	NA	NA
14.1.22	650289	656532	14	1	22	9999	NA	N	N	N	N	01/09/2014	N	NA	NA	NA	NA
14.1.23	650298	656516	14	1	23	9999	NA	N	N	N	N	01/09/2014	N	NA	NA	NA	NA
14.1.24	650287	656509	14	1	24	9999	NA	N	N	N	N	01/09/2014	N	NA	NA	NA	NA
14.1.25	650275	656502	14	1	25	9999	NA	N	N	N	N	01/09/2014	N	NA	NA	NA	NA
14.1.26	650263	656498	14	1	26	9999	NA	N	N	N	N	01/09/2014	N	NA	NA	NA	NA
14.1.27	650250	656499	14	1	27	9999	NA	N	N	N	N	01/09/2014	N	NA	NA	NA	NA
14.1.28	650237	656500	14	1	28	9999	NA	N	N	N	N	01/09/2014	N	NA	NA	NA	NA
14.1.29	650224	656501	14	1	29	9999	NA	N	N	N	N	01/09/2014	N	NA	NA	NA	NA
14.1.3	650052	656575	14	1	3	9999	NA	N	N	N	N	01/09/2014	N	NA	NA	NA	NA
14.1.30	650211	656502	14	1	30	9999	NA	N	N	N	N	01/09/2014	N	NA	NA	NA	NA
14.1.31	650198	656503	14	1	31	9999	NA	N	N	N	N	01/09/2014	N	NA	NA	NA	NA
14.1.32	650186	656504	14	1	32	9999	NA	N	N	N	N	01/09/2014	N	NA	NA	NA	NA
14.1.33	650173	656506	14	1	33	9999	NA	N	N	N	N	01/09/2014	N	NA	NA	NA	NA
14.1.34	650160	656507	14	1	34	9999	NA	N	N	N	N	01/09/2014	N	NA	NA	NA	NA
14.1.35	650147	656508	14	1	35	9999	NA	N	N	N	N	01/09/2014	N	NA	NA	NA	NA
14.1.36	650134	656509	14	1	36	9999	NA	N	N	N	N	01/09/2014	N	NA	NA	NA	NA
14.1.37	650122	656510	14	1	37	9999	NA	N	N	N	N	01/09/2014	N	NA	NA	NA	NA
14.1.38	650109	656511	14	1	38	9999	NA	N	N	N	N	01/09/2014	N	NA	NA	NA	NA
14.1.39	650096	656512	14	1	39	9999	NA	N	N	N	N	01/09/2014	N	NA	NA	NA	NA
14.1.4	650064	656573	14	1	4	9999	NA	N	N	N	N	01/09/2014	N	NA	NA	NA	NA
14.1.40	650083	656513	14	1	40	9999	NA	N	N	N	N	01/09/2014	N	NA	NA	NA	NA
14.1.41	650070	656515	14	1	41	9999	NA	N	N	N	N	01/09/2014	N	NA	NA	NA	NA
14.1.42	650058	656516	14	1	42	9999	NA	N	N	N	N	01/09/2014	N	NA	NA	NA	NA
14.1.43	650045	656517	14	1	43	9999	NA	N	N	N	N	01/09/2014	N	NA	NA	NA	NA
14.1.44	650032	656518	14	1	44	9999	NA	N	N	N	N	01/09/2014	N	NA	NA	NA	NA
14.1.45	650019	656519	14	1	45	9999	NA	N	N	N	N	01/09/2014	N	NA	NA	NA	NA
14.1.46	650006	656520	14	1	46	9999	NA	N	N	N	N	01/09/2014	N	NA	NA	NA	NA
14.1.47	649994	656521	14	1	47	9999	NA	N	N	N	N	01/09/2014	N	NA	NA	NA	NA
14.1.48	649981	656523	14	1	48	9999	NA	N	N	N	N	01/09/2014	N	NA	NA	NA	NA
14.1.5	650077	656572	14	1	5	9999	NA	N	N	N	N	01/09/2014	N	NA	NA	NA	NA
14.1.6	650090	656571	14	1	6	9999	NA	N	N	N	N	01/09/2014	N	NA	NA	NA	NA
14.1.7	650103	656570	14	1	7	9999	NA	N	N	N	N	01/09/2014	N	NA	NA	NA	NA
14.1.8	650116	656568	14	1	8	9999	NA	N	N	N	N	01/09/2014	N	NA	NA	NA	NA
14.1.9	650128	656567	14	1	9	9999	NA	N	N	N	N	01/09/2014	N	NA	NA	NA	NA
14.2.1	650259	656219	14	2	1	9999	NA	N	N	N	N	01/09/2014	N	NA	NA	NA	NA
14.2.10	650157	656245	14	2	10	9999	NA	N	N	N	N	01/09/2014	N	NA	NA	NA	NA
14.2.11	650146	656248	14	2	11	9999	NA	N	N	N	N	01/09/2014	N	NA	NA	NA	NA
14.2.12	650135	656251	14	2	12	9999	NA	N	N	N	N	01/09/2014	N	NA	NA	NA	NA
14.2.13	650123	656254	14	2	13	9999	NA	N	N	N	N	01/09/2014	N	NA	NA	NA	NA
14.2.14	650112	656257	14	2	14	9999	NA	N	N	N	N	01/09/2014	N	NA	NA	NA	NA
14.2.15	650101	656260	14	2	15	9999	NA	N	N	N	N	01/09/2014	N	NA	NA	NA	NA
14.2.16	650089	656262	14	2	16	9999	NA	N	N	N	N	01/09/2014	N	NA	NA	NA	NA
14.2.17	650078	656265	14	2	17	9999	NA	N	N	N	N	01/09/2014	N	NA	NA	NA	NA
14.2.18	650067	656268	14	2	18	9999	NA	N	N	N	N	01/09/2014	N	NA	NA	NA	NA
14.2.19	650055	656271	14	2	19	9999	NA	N	N	N	N	01/09/2014	N	NA	NA	NA	NA
14.2.2	650248	656222	14	2	2	9999	NA	N	N	N	N	01/09/2014	N	NA	NA	NA	NA
14.2.20	650044	656274	14	2	20	9999	NA	N	N	N	N	01/09/2014	N	NA	NA	NA	NA
14.2.21	650033	656277	14	2	21	9999	NA	N	N	N	N	01/09/2014	N	NA	NA	NA	NA
14.2.22	650020	656280	14	2	22	9999	NA	N	N	N	N	01/09/2014	N	NA	NA	NA	NA
14.2.23	650013	656290	14	2	23	9999	NA	N	N	N	N	01/09/2014	N	NA	NA	NA	NA
14.2.24	650008	656300	14	2	24	9999	NA	N	N	N	N	01/09/2014	N	NA	NA	NA	NA
14.2.25	650014	656309	14	2	25	9999	NA	N	N	N	N	01/09/2014	N	NA	NA	NA	NA
14.2.26	650021	656317	14	2	26	9999	NA	N	N	N	N	01/09/2014	N	NA	NA	NA	NA
14.2.27	650032	656315	14	2	27	9999	NA	N	N	N	N	01/09/2014	N	NA	NA	NA	NA
14.2.28	650043	656314	14	2	28	9999	NA	N	N	N	N	01/09/2014	N	NA	NA	NA	NA
14.2.29	650055	656312	14	2	29	9999	NA	N	N	N	N	01/09/2014	N	NA	NA	NA	NA
14.2.3	650236	656225	14	2	3	M	41.3	N	N	N	N	01/09/2014	N	NA	NA	NA	NA
14.2.30	650066	656310	14	2	30	9999	NA	N	N	N	N	01/09/2014	N	NA	NA	NA	NA
14.2.31	650078	656308	14	2	31	9999	NA	N	N	N	N	01/09/2014	N	NA	NA	NA	NA
14.2.32	650089	656306	14	2	32	9999	NA	N	N	N	N	01/09/2014	N	NA	NA	NA	NA
14.2.33	650100	656304	14	2	33	9999	NA	N	N	N	N	01/09/2014	N	NA	NA	NA	NA
14.2.34	650112	656302	14	2	34	9999	NA	N	N	N	N	01/09/2014	N	NA	NA	NA	NA
14.2.35	650123	656300	14	2	35	9999	NA	N	N	N	N	01/09/2014	N	NA	NA	NA	NA
14.2.36	650134	656298	14	2	36	9999	NA	N	N	N	N	01/09/2014	N	NA	NA	NA	NA
14.2.37	650146	656296	14	2	37	9999	NA	N	N	N	N	01/09/2014	N	NA	NA	NA	NA
14.2.38	650157	656294	14	2	38	9999	NA	N	N	N	N	01/09/2014	N	NA	NA	NA	NA
14.2.39	650169	656292	14	2	39	9999	NA	N	N	N	N	01/09/2014	N	NA	NA	NA	NA
14.2.4	650225	656228	14	2	4	9999	NA	N	N	N	N	01/09/2014	N	NA	NA	NA	NA
14.2.40	650180	656290	14	2	40	9999	NA	N	N	N	N	01/09/2014	N	NA	NA	NA	NA
14.2.41	650191	656288	14	2	41	9999	NA	N	N	N	N	01/09/2014	N	NA	NA	NA	NA
14.2.42	650203	656286	14	2	42	9999	NA	N	N	N	N	01/09/2014	N	NA	NA	NA	NA
14.2.43	650214	656284	14	2	43	9999	NA	N	N	N	N	01/09/2014	N	NA	NA	NA	NA
14.2.44	650226	656282	14	2	44	9999	NA	N	N	N	N	01/09/2014	N	NA	NA	NA	NA
14.2.45	650237	656280	14	2	45	9999	NA	N	N	N	N	01/09/2014	N	NA	NA	NA	NA
14.2.46	650248	656278	14	2	46	9999	NA	N	N	N	N	01/09/2014	N	NA	NA	NA	NA
14.2.47	650260	656276	14	2	47	9999	NA	N	N	N	N	01/09/2014	N	NA	NA	NA	NA
14.2.48	650271	656275	14	2	48	9999	NA	N	N	N	N	01/09/2014	N	NA	NA	NA	NA
14.2.5	650214	656231	14	2	5	9999	NA	N	N	N	N	01/09/2014	N	NA	NA	NA	NA
14.2.6	650202	656234	14	2	6	9999	NA	N	N	N	N	01/09/2014	N	NA	NA	NA	NA
14.2.7	650191	656236	14	2	7	9999	NA	N	N	N	N	01/09/2014	N	NA	NA	NA	NA
14.2.8	650180	656239	14	2	8	9999	NA	N	N	N	N	01/09/2014	N	NA	NA	NA	NA
14.2.9	650168	656242	14	2	9	9999	NA	N	N	N	N	01/09/2014	N	NA	NA	NA	NA
14.3.1	650279	656163	14	3	1	9999	NA	N	N	N	N	01/09/2014	N	NA	NA	NA	NA
14.3.10	650327	656255	14	3	10	9999	NA	N	N	N	N	01/09/2014	N	NA	NA	NA	NA
14.3.11	650333	656265	14	3	11	9999	NA	N	N	N	N	01/09/2014	N	NA	NA	NA	NA
14.3.12	650338	656273	14	3	12	9999	NA	N	N	N	N	01/09/2014	N	NA	NA	NA	NA
14.3.13	650346	656271	14	3	13	9999	NA	N	N	N	N	01/09/2014	N	NA	NA	NA	NA
14.3.14	650354	656269	14	3	14	9999	NA	N	N	N	N	01/09/2014	N	NA	NA	NA	NA
14.3.15	650362	656267	14	3	15	9999	NA	N	N	N	N	01/09/2014	N	NA	NA	NA	NA
14.3.16	650370	656266	14	3	16	9999	NA	N	N	N	N	01/09/2014	N	NA	NA	NA	NA
14.3.17	650378	656264	14	3	17	9999	NA	N	N	N	N	01/09/2014	N	NA	NA	NA	NA
14.3.18	650385	656262	14	3	18	9999	NA	N	N	N	N	01/09/2014	N	NA	NA	NA	NA
14.3.19	650393	656261	14	3	19	9999	NA	N	N	N	N	01/09/2014	N	NA	NA	NA	NA
14.3.2	650285	656173	14	3	2	9999	NA	N	N	N	N	01/09/2014	N	NA	NA	NA	NA
14.3.20	650401	656259	14	3	20	9999	NA	N	N	N	N	01/09/2014	N	NA	NA	NA	NA
14.3.21	650409	656257	14	3	21	9999	NA	N	N	N	N	01/09/2014	N	NA	NA	NA	NA
14.3.22	650417	656255	14	3	22	9999	NA	N	N	N	N	01/09/2014	N	NA	NA	NA	NA
14.3.23	650425	656254	14	3	23	9999	NA	N	N	N	N	01/09/2014	N	NA	NA	NA	NA
14.3.24	650432	656252	14	3	24	9999	NA	N	N	N	N	01/09/2014	N	NA	NA	NA	NA
14.3.25	650440	656250	14	3	25	9999	NA	N	N	N	N	01/09/2014	N	NA	NA	NA	NA
14.3.26	650448	656249	14	3	26	9999	NA	N	N	N	N	01/09/2014	N	NA	NA	NA	NA
14.3.27	650456	656247	14	3	27	9999	NA	N	N	N	N	01/09/2014	N	NA	NA	NA	NA
14.3.28	650464	656245	14	3	28	9999	NA	N	N	N	N	01/09/2014	N	NA	NA	NA	NA
14.3.29	650472	656243	14	3	29	9999	NA	N	N	N	N	01/09/2014	N	NA	NA	NA	NA
14.3.3	650290	656183	14	3	3	9999	NA	N	N	N	N	01/09/2014	N	NA	NA	NA	NA
14.3.30	650480	656242	14	3	30	9999	NA	N	N	N	N	01/09/2014	N	NA	NA	NA	NA
14.3.31	650487	656240	14	3	31	9999	NA	N	N	N	N	01/09/2014	N	NA	NA	NA	NA
14.3.32	650495	656238	14	3	32	9999	NA	N	N	N	N	01/09/2014	N	NA	NA	NA	NA
14.3.33	650503	656236	14	3	33	9999	NA	N	N	N	N	01/09/2014	N	NA	NA	NA	NA
14.3.34	650511	656235	14	3	34	9999	NA	N	N	N	N	01/09/2014	N	NA	NA	NA	NA
14.3.35	650519	656233	14	3	35	9999	NA	N	N	N	N	01/09/2014	N	NA	NA	NA	NA
14.3.36	650527	656231	14	3	36	9999	NA	N	N	N	N	01/09/2014	N	NA	NA	NA	NA
14.3.37	650534	656230	14	3	37	9999	NA	N	N	N	N	01/09/2014	N	NA	NA	NA	NA
14.3.38	650542	656228	14	3	38	9999	NA	N	N	N	N	01/09/2014	N	NA	NA	NA	NA
14.3.39	650550	656226	14	3	39	9999	NA	N	N	N	N	01/09/2014	N	NA	NA	NA	NA
14.3.4	650295	656194	14	3	4	9999	NA	N	N	N	N	01/09/2014	N	NA	NA	NA	NA
14.3.40	650558	656224	14	3	40	9999	NA	N	N	N	N	01/09/2014	N	NA	NA	NA	NA
14.3.41	650566	656223	14	3	41	9999	NA	N	N	N	N	01/09/2014	N	NA	NA	NA	NA
14.3.42	650574	656221	14	3	42	M	35.5	N	N	N	N	01/09/2014	N	NA	NA	NA	NA
14.3.43	650581	656219	14	3	43	9999	NA	N	N	N	N	01/09/2014	N	NA	NA	NA	NA
14.3.44	650589	656218	14	3	44	9999	NA	N	N	N	N	01/09/2014	N	NA	NA	NA	NA
14.3.45	650597	656216	14	3	45	9999	NA	N	N	N	N	01/09/2014	N	NA	NA	NA	NA
14.3.46	650605	656214	14	3	46	9999	NA	N	N	N	N	01/09/2014	N	NA	NA	NA	NA
14.3.47	650613	656212	14	3	47	9999	NA	N	N	N	N	01/09/2014	N	NA	NA	NA	NA
14.3.48	650621	656211	14	3	48	9999	NA	N	N	N	N	01/09/2014	N	NA	NA	NA	NA
14.3.5	650301	656204	14	3	5	9999	NA	N	N	N	N	01/09/2014	N	NA	NA	NA	NA
14.3.6	650306	656214	14	3	6	9999	NA	N	N	N	N	01/09/2014	N	NA	NA	NA	NA
14.3.7	650311	656224	14	3	7	9999	NA	N	N	N	N	01/09/2014	N	NA	NA	NA	NA
14.3.7	650311	656224	14	3	7	M	41.2	N	N	N	N	01/09/2014	Y	453	34.8	6.4	70
14.3.8	650317	656234	14	3	8	9999	NA	N	N	N	N	01/09/2014	N	NA	NA	NA	NA
14.3.9	650322	656244	14	3	9	M	42.6	N	N	N	N	01/09/2014	Y	453	35.9	6.7	83
14.3.9	650322	656244	14	3	9	9999	NA	N	N	N	N	01/09/2014	N	NA	NA	NA	NA
14.4.1	650369	656235	14	4	1	9999	NA	N	N	N	N	01/09/2014	N	NA	NA	NA	NA
14.4.10	650475	656208	14	4	10	9999	NA	N	N	N	N	01/09/2014	N	NA	NA	NA	NA
14.4.11	650487	656205	14	4	11	9999	NA	N	N	N	N	01/09/2014	N	NA	NA	NA	NA
14.4.12	650498	656202	14	4	12	9999	NA	N	N	N	N	01/09/2014	N	NA	NA	NA	NA
14.4.13	650510	656199	14	4	13	9999	NA	N	N	N	N	01/09/2014	N	NA	NA	NA	NA
14.4.14	650522	656196	14	4	14	9999	NA	N	N	N	N	01/09/2014	N	NA	NA	NA	NA
14.4.15	650534	656193	14	4	15	F	41	N	N	N	N	01/09/2014	N	NA	NA	NA	NA
14.4.16	650545	656190	14	4	16	9999	NA	N	N	N	N	01/09/2014	N	NA	NA	NA	NA
14.4.17	650557	656187	14	4	17	9999	NA	N	N	N	N	01/09/2014	N	NA	NA	NA	NA
14.4.18	650569	656184	14	4	18	9999	NA	N	N	N	N	01/09/2014	N	NA	NA	NA	NA
14.4.19	650581	656181	14	4	19	9999	NA	N	N	N	N	01/09/2014	N	NA	NA	NA	NA
14.4.2	650381	656232	14	4	2	9999	NA	N	N	N	N	01/09/2014	N	NA	NA	NA	NA
14.4.20	650592	656178	14	4	20	M	40	N	Y	N	N	01/09/2014	N	NA	NA	NA	NA
14.4.21	650604	656175	14	4	21	9999	NA	N	N	N	N	01/09/2014	N	NA	NA	NA	NA
14.4.22	650614	656165	14	4	22	9999	NA	N	N	N	N	01/09/2014	N	NA	NA	NA	NA
14.4.23	650616	656154	14	4	23	9999	NA	N	N	N	N	01/09/2014	N	NA	NA	NA	NA
14.4.24	650604	656149	14	4	24	M	37.4	N	N	N	N	01/09/2014	N	NA	NA	NA	NA
14.4.25	650592	656144	14	4	25	9999	NA	N	N	N	N	01/09/2014	N	NA	NA	NA	NA
14.4.26	650580	656140	14	4	26	9999	NA	N	N	N	N	01/09/2014	N	NA	NA	NA	NA
14.4.27	650569	656140	14	4	27	9999	NA	N	N	N	N	01/09/2014	N	NA	NA	NA	NA
14.4.28	650557	656143	14	4	28	9999	NA	N	N	N	N	01/09/2014	N	NA	NA	NA	NA
14.4.29	650545	656147	14	4	29	9999	NA	N	N	N	N	01/09/2014	N	NA	NA	NA	NA
14.4.3	650392	656229	14	4	3	9999	NA	N	N	N	N	01/09/2014	N	NA	NA	NA	NA
14.4.30	650534	656151	14	4	30	9999	NA	N	N	N	N	01/09/2014	N	NA	NA	NA	NA
14.4.31	650522	656155	14	4	31	9999	NA	N	N	N	N	01/09/2014	N	NA	NA	NA	NA
14.4.32	650511	656159	14	4	32	9999	NA	N	N	N	N	01/09/2014	N	NA	NA	NA	NA
14.4.33	650499	656163	14	4	33	9999	NA	N	N	N	N	01/09/2014	N	NA	NA	NA	NA
14.4.34	650487	656167	14	4	34	M	35.9	N	N	N	N	01/09/2014	N	NA	NA	NA	NA
14.4.35	650476	656171	14	4	35	9999	NA	N	N	N	N	01/09/2014	N	NA	NA	NA	NA
14.4.36	650464	656175	14	4	36	M	40.8	N	N	N	N	01/09/2014	N	NA	NA	NA	NA
14.4.37	650452	656178	14	4	37	9999	NA	N	N	N	N	01/09/2014	N	NA	NA	NA	NA
14.4.38	650441	656182	14	4	38	9999	NA	N	N	N	N	01/09/2014	N	NA	NA	NA	NA
14.4.39	650429	656186	14	4	39	9999	NA	N	N	N	N	01/09/2014	N	NA	NA	NA	NA
14.4.4	650404	656226	14	4	4	9999	NA	N	N	N	N	01/09/2014	N	NA	NA	NA	NA
14.4.40	650417	656190	14	4	40	F	34.7	N	N	N	N	01/09/2014	N	NA	NA	NA	NA
14.4.40	650417	656190	14	4	40	F	37.7	N	N	N	N	01/09/2014	N	NA	NA	NA	NA
14.4.40	650417	656190	14	4	40	F	45.9	N	N	N	N	01/09/2014	N	NA	NA	NA	NA
14.4.41	650406	656194	14	4	41	9999	NA	N	N	N	N	01/09/2014	N	NA	NA	NA	NA
14.4.42	650394	656198	14	4	42	9999	NA	N	N	N	N	01/09/2014	N	NA	NA	NA	NA
14.4.43	650382	656202	14	4	43	9999	NA	N	N	N	N	01/09/2014	N	NA	NA	NA	NA
14.4.44	650371	656206	14	4	44	9999	NA	N	N	N	N	01/09/2014	N	NA	NA	NA	NA
14.4.45	650359	656210	14	4	45	9999	NA	N	N	N	N	01/09/2014	N	NA	NA	NA	NA
14.4.46	650347	656213	14	4	46	9999	NA	N	N	N	N	01/09/2014	N	NA	NA	NA	NA
14.4.47	650336	656217	14	4	47	9999	NA	N	N	N	N	01/09/2014	N	NA	NA	NA	NA
14.4.48	650336	656217	14	4	48	M	56.3	N	N	N	N	01/09/2014	N	NA	NA	NA	NA
14.4.5	650416	656223	14	4	5	M	39	N	N	N	N	01/09/2014	N	NA	NA	NA	NA
14.4.6	650428	656220	14	4	6	M	43.5	N	N	N	N	01/09/2014	N	NA	NA	NA	NA
14.4.7	650439	656217	14	4	7	M	40.5	N	N	N	N	01/09/2014	N	NA	NA	NA	NA
14.4.8	650451	656214	14	4	8	M	36.3	N	N	N	N	01/09/2014	N	NA	NA	NA	NA
14.4.8	650451	656214	14	4	8	M	38.7	N	N	N	N	01/09/2014	N	NA	NA	NA	NA
14.4.8	650451	656214	14	4	8	M	41.3	N	Y	N	N	01/09/2014	N	NA	NA	NA	NA
14.4.9	650463	656211	14	4	9	9999	NA	N	N	N	N	01/09/2014	N	NA	NA	NA	NA
14.5.1	650346	656180	14	5	1	9999	NA	N	N	N	N	01/09/2014	N	NA	NA	NA	NA
14.5.10	650447	656154	14	5	10	F	41.5	N	N	N	N	01/09/2014	N	NA	NA	NA	NA
14.5.10	650447	656154	14	5	10	M	35.4	N	N	N	N	01/09/2014	N	NA	NA	NA	NA
14.5.11	650458	656151	14	5	11	M	33.4	N	N	N	N	01/09/2014	N	NA	NA	NA	NA
14.5.11	650458	656151	14	5	11	M	36	N	N	N	N	01/09/2014	N	NA	NA	NA	NA
14.5.12	650470	656148	14	5	12	9999	NA	N	N	N	N	01/09/2014	N	NA	NA	NA	NA
14.5.13	650481	656145	14	5	13	9999	NA	N	N	N	N	01/09/2014	N	NA	NA	NA	NA
14.5.14	650492	656143	14	5	14	F	38	N	Y	N	N	01/09/2014	N	NA	NA	NA	NA
14.5.14	650492	656143	14	5	14	M	39.4	N	N	N	N	01/09/2014	Y	439	30.9	8.5	264
14.5.15	650503	656140	14	5	15	M	39.5	N	N	N	N	01/09/2014	N	NA	NA	NA	NA
14.5.16	650515	656137	14	5	16	9999	NA	N	N	N	N	01/09/2014	N	NA	NA	NA	NA
14.5.17	650526	656134	14	5	17	M	43.1	N	Y	N	N	01/09/2014	N	NA	NA	NA	NA
14.5.18	650537	656131	14	5	18	9999	NA	N	N	N	N	01/09/2014	N	NA	NA	NA	NA
14.5.19	650548	656128	14	5	19	F	49.2	N	Y	N	N	01/09/2014	N	NA	NA	NA	NA
14.5.2	650357	656177	14	5	2	9999	NA	N	N	N	N	01/09/2014	N	NA	NA	NA	NA
14.5.20	650560	656125	14	5	20	9999	NA	N	N	N	N	01/09/2014	N	NA	NA	NA	NA
14.5.21	650571	656122	14	5	21	9999	NA	N	N	N	N	01/09/2014	N	NA	NA	NA	NA
14.5.22	650582	656120	14	5	22	F	33.8	N	N	N	N	01/09/2014	N	NA	NA	NA	NA
14.5.23	650591	656109	14	5	23	9999	NA	N	N	N	N	01/09/2014	N	NA	NA	NA	NA
14.5.24	650592	656098	14	5	24	9999	NA	N	N	N	N	01/09/2014	N	NA	NA	NA	NA
14.5.25	650581	656092	14	5	25	9999	NA	N	N	N	N	01/09/2014	N	NA	NA	NA	NA
14.5.26	650570	656086	14	5	26	9999	NA	N	N	N	N	01/09/2014	N	NA	NA	NA	NA
14.5.27	650559	656083	14	5	27	9999	NA	N	N	N	N	01/09/2014	N	NA	NA	NA	NA
14.5.28	650548	656086	14	5	28	9999	NA	N	N	N	N	01/09/2014	N	NA	NA	NA	NA
14.5.29	650537	656089	14	5	29	9999	NA	N	N	N	N	01/09/2014	N	NA	NA	NA	NA
14.5.3	650368	656174	14	5	3	9999	NA	N	N	N	N	01/09/2014	N	NA	NA	NA	NA
14.5.30	650526	656092	14	5	30	M	38.9	N	N	N	N	01/09/2014	N	NA	NA	NA	NA
14.5.31	650514	656095	14	5	31	9999	NA	N	N	N	N	01/09/2014	N	NA	NA	NA	NA
14.5.32	650503	656097	14	5	32	M	29.3	N	N	N	N	01/09/2014	N	NA	NA	NA	NA
14.5.32	650503	656097	14	5	32	M	42.7	N	N	N	N	01/09/2014	N	NA	NA	NA	NA
14.5.33	650492	656100	14	5	33	M	34.9	N	N	N	N	01/09/2014	N	NA	NA	NA	NA
14.5.34	650480	656103	14	5	34	M	37.5	N	N	N	N	01/09/2014	N	NA	NA	NA	NA
14.5.35	650469	656106	14	5	35	F	41	N	N	N	N	01/09/2014	N	NA	NA	NA	NA
14.5.35	650469	656106	14	5	35	M	39.3	N	N	N	N	01/09/2014	N	NA	NA	NA	NA
14.5.35	650469	656106	14	5	35	M	40.3	N	N	N	N	01/09/2014	N	NA	NA	NA	NA
14.5.36	650458	656109	14	5	36	F	39.3	N	N	N	N	01/09/2014	N	NA	NA	NA	NA
14.5.37	650447	656112	14	5	37	9999	NA	N	N	N	N	01/09/2014	N	NA	NA	NA	NA
14.5.38	650435	656115	14	5	38	F	41	N	N	N	N	01/09/2014	N	NA	NA	NA	NA
14.5.39	650424	656118	14	5	39	M	45.7	N	N	N	N	01/09/2014	N	NA	NA	NA	NA
14.5.4	650379	656171	14	5	4	9999	NA	N	N	N	N	01/09/2014	N	NA	NA	NA	NA
14.5.40	650413	656120	14	5	40	9999	NA	N	N	N	N	01/09/2014	N	NA	NA	NA	NA
14.5.41	650402	656123	14	5	41	F	43.9	N	N	N	N	01/09/2014	N	NA	NA	NA	NA
14.5.42	650390	656126	14	5	42	9999	NA	N	N	N	N	01/09/2014	N	NA	NA	NA	NA
14.5.43	650379	656129	14	5	43	9999	NA	N	N	N	N	01/09/2014	N	NA	NA	NA	NA
14.5.44	650368	656132	14	5	44	9999	NA	N	N	N	N	01/09/2014	N	NA	NA	NA	NA
14.5.45	650357	656135	14	5	45	9999	NA	N	N	N	N	01/09/2014	N	NA	NA	NA	NA
14.5.46	650345	656138	14	5	46	9999	NA	N	N	N	N	01/09/2014	N	NA	NA	NA	NA
14.5.47	650334	656141	14	5	47	9999	NA	N	N	N	N	01/09/2014	N	NA	NA	NA	NA
14.5.48	650323	656143	14	5	48	M	34.4	N	N	N	N	01/09/2014	N	NA	NA	NA	NA
14.5.5	650391	656168	14	5	5	9999	NA	N	N	N	N	01/09/2014	N	NA	NA	NA	NA
14.5.6	650402	656166	14	5	6	9999	NA	N	N	N	N	01/09/2014	N	NA	NA	NA	NA
14.5.7	650413	656163	14	5	7	9999	NA	N	N	N	N	01/09/2014	N	NA	NA	NA	NA
14.5.8	650424	656160	14	5	8	9999	NA	N	N	N	N	01/09/2014	N	NA	NA	NA	NA
14.5.9	650436	656157	14	5	9	9999	NA	N	N	N	N	01/09/2014	N	NA	NA	NA	NA
14.6.1	650333	656106	14	6	1	M	52.9	N	N	N	N	01/09/2014	N	NA	NA	NA	NA
14.6.10	650435	656075	14	6	10	9999	NA	N	N	N	N	01/09/2014	N	NA	NA	NA	NA
14.6.11	650447	656071	14	6	11	9999	NA	N	N	N	N	01/09/2014	N	NA	NA	NA	NA
14.6.12	650458	656068	14	6	12	9999	NA	N	N	N	N	01/09/2014	N	NA	NA	NA	NA
14.6.13	650469	656064	14	6	13	M	43.1	N	N	N	N	01/09/2014	N	NA	NA	NA	NA
14.6.14	650481	656061	14	6	14	9999	NA	N	N	N	N	01/09/2014	N	NA	NA	NA	NA
14.6.15	650492	656057	14	6	15	9999	NA	N	N	N	N	01/09/2014	N	NA	NA	NA	NA
14.6.16	650504	656054	14	6	16	9999	NA	N	N	N	N	01/09/2014	N	NA	NA	NA	NA
14.6.17	650515	656050	14	6	17	9999	NA	N	N	N	N	01/09/2014	N	NA	NA	NA	NA
14.6.18	650526	656047	14	6	18	9999	NA	N	N	N	N	01/09/2014	N	NA	NA	NA	NA
14.6.19	650538	656043	14	6	19	9999	NA	N	N	N	N	01/09/2014	N	NA	NA	NA	NA
14.6.2	650344	656103	14	6	2	M	37.5	N	N	N	N	01/09/2014	N	NA	NA	NA	NA
14.6.2	650344	656103	14	6	2	M	45.5	N	N	N	N	01/09/2014	N	NA	NA	NA	NA
14.6.20	650549	656040	14	6	20	F	34.5	N	N	N	N	01/09/2014	N	NA	NA	NA	NA
14.6.21	650560	656036	14	6	21	9999	NA	N	N	N	N	01/09/2014	N	NA	NA	NA	NA
14.6.22	650572	656033	14	6	22	9999	NA	N	N	N	N	01/09/2014	N	NA	NA	NA	NA
14.6.23	650583	656029	14	6	23	9999	NA	N	N	N	N	01/09/2014	N	NA	NA	NA	NA
14.6.24	650594	656026	14	6	24	9999	NA	N	N	N	N	01/09/2014	N	NA	NA	NA	NA
14.6.25	650583	656020	14	6	25	9999	NA	N	N	N	N	01/09/2014	N	NA	NA	NA	NA
14.6.26	650572	656014	14	6	26	9999	NA	N	N	N	N	01/09/2014	N	NA	NA	NA	NA
14.6.27	650561	656008	14	6	27	9999	NA	N	N	N	N	01/09/2014	N	NA	NA	NA	NA
14.6.28	650549	656011	14	6	28	9999	NA	N	N	N	N	01/09/2014	N	NA	NA	NA	NA
14.6.29	650538	656014	14	6	29	F	36.4	N	N	N	N	01/09/2014	N	NA	NA	NA	NA
14.6.3	650356	656099	14	6	3	M	31.4	N	Y	N	N	01/09/2014	N	NA	NA	NA	NA
14.6.30	650526	656017	14	6	30	9999	NA	N	N	N	N	01/09/2014	N	NA	NA	NA	NA
14.6.31	650515	656020	14	6	31	F	46.4	N	N	N	N	01/09/2014	N	NA	NA	NA	NA
14.6.32	650503	656023	14	6	32	U	37.8	N	N	N	N	01/09/2014	N	NA	NA	NA	NA
14.6.33	650492	656026	14	6	33	9999	NA	N	N	N	N	01/09/2014	N	NA	NA	NA	NA
14.6.34	650481	656029	14	6	34	9999	NA	N	N	N	N	01/09/2014	N	NA	NA	NA	NA
14.6.35	650469	656032	14	6	35	9999	NA	N	N	N	N	01/09/2014	N	NA	NA	NA	NA
14.6.36	650458	656035	14	6	36	F	42.8	N	Y	N	N	01/09/2014	N	NA	NA	NA	NA
14.6.37	650446	656039	14	6	37	9999	NA	N	N	N	N	01/09/2014	N	NA	NA	NA	NA
14.6.38	650435	656042	14	6	38	9999	NA	N	N	N	N	01/09/2014	N	NA	NA	NA	NA
14.6.39	650423	656045	14	6	39	F	44.8	N	N	N	N	01/09/2014	N	NA	NA	NA	NA
14.6.4	650367	656096	14	6	4	9999	NA	N	N	N	N	01/09/2014	N	NA	NA	NA	NA
14.6.40	650412	656048	14	6	40	F	33.4	N	N	N	N	01/09/2014	N	NA	NA	NA	NA
14.6.41	650401	656051	14	6	41	F	48.2	N	N	N	N	01/09/2014	N	NA	NA	NA	NA
14.6.42	650389	656054	14	6	42	9999	NA	N	N	N	N	01/09/2014	N	NA	NA	NA	NA
14.6.43	650378	656057	14	6	43	9999	NA	N	N	N	N	01/09/2014	N	NA	NA	NA	NA
14.6.44	650366	656060	14	6	44	9999	NA	N	N	N	N	01/09/2014	N	NA	NA	NA	NA
14.6.45	650355	656063	14	6	45	9999	NA	N	N	N	N	01/09/2014	N	NA	NA	NA	NA
14.6.46	650344	656066	14	6	46	9999	NA	N	N	N	N	01/09/2014	N	NA	NA	NA	NA
14.6.47	650332	656069	14	6	47	9999	NA	N	N	N	N	01/09/2014	N	NA	NA	NA	NA
14.6.48	650332	656069	14	6	48	9999	NA	N	N	N	N	01/09/2014	N	NA	NA	NA	NA
14.6.5	650378	656092	14	6	5	9999	NA	N	N	N	N	01/09/2014	N	NA	NA	NA	NA
14.6.6	650390	656089	14	6	6	F	40.3	N	N	N	N	01/09/2014	N	NA	NA	NA	NA
14.6.7	650401	656085	14	6	7	9999	NA	N	N	N	N	01/09/2014	N	NA	NA	NA	NA
14.6.8	650413	656082	14	6	8	M	36.1	N	N	N	N	01/09/2014	N	NA	NA	NA	NA
14.6.9	650424	656078	14	6	9	9999	NA	N	N	N	N	01/09/2014	N	NA	NA	NA	NA
15.2.3	650386	656173	15	2	3	F	40.6	N	N	N	N	04/06/2015	Y	686	36.3	4.3	154
15.1.42	650434	656195	15	1	42	M	46.1	N	N	N	N	04/06/2015	Y	729	35.9	10.2	196
[truncated: 4,382 more rows]
